# Supplementary material for: Chromosome-Level Genome Assembly and Circadian Gene Repertoire of the Patagonia Blennie Eleginops maclovinus—The Closest Ancestral Proxy of Antarctic Cryonotothenioids
Source: MDPI journal article supplement (doi:10.3390/genes14061196), 2023-05-30
Supplement: s1 [file s1]

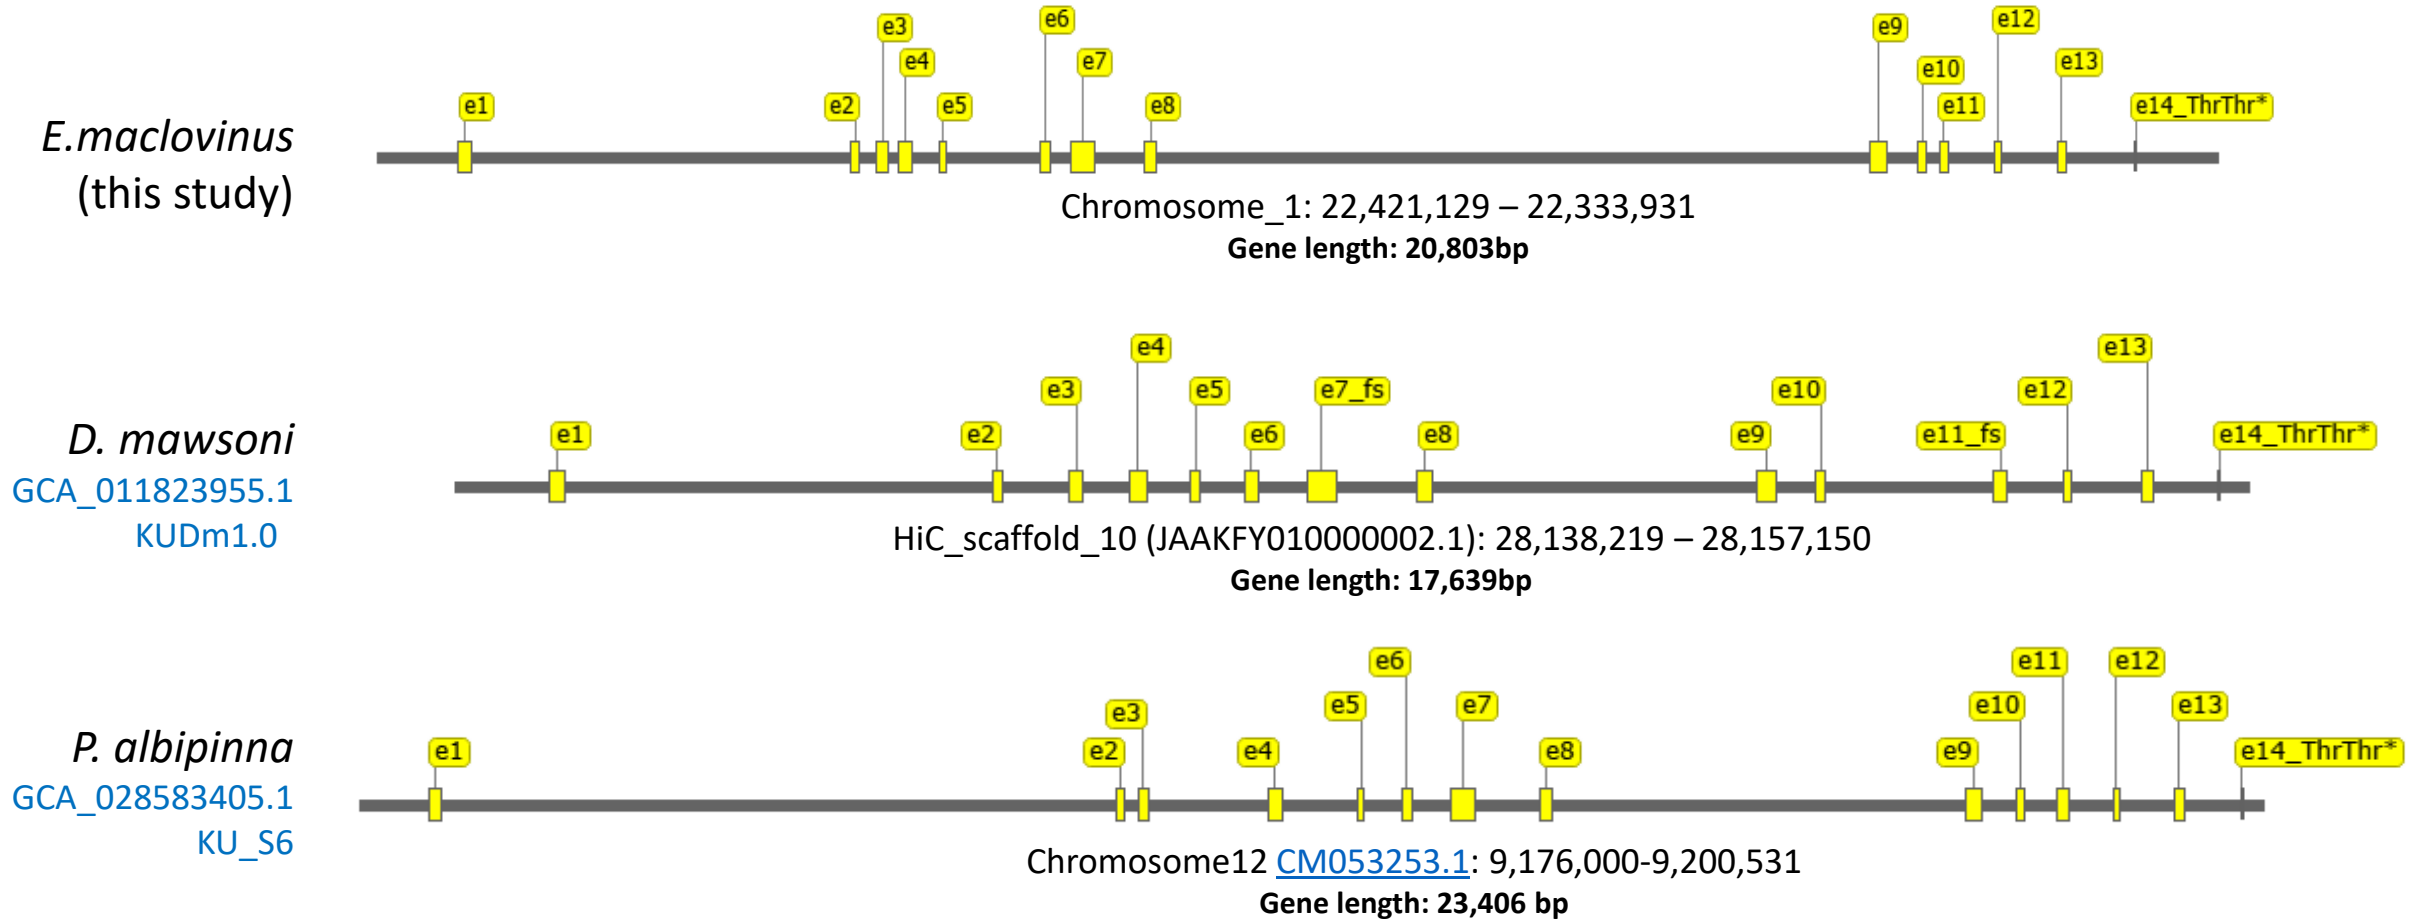

Figure S2. Manually curated and annotated *cry3a* from *D. mawsoni* and *P. albipinna* genome assembly. *E. maclovinus* *cry3a* gene structure is given as reference. “e” stands for exon. The two Thr residues encoded by the mini-e14 is indicated. Relative lengths of exons (rectangular boxes) and between exons are to scale.
