# Supplementary material for: Chromosome-Level Genome Assembly and Circadian Gene Repertoire of the Patagonia Blennie Eleginops maclovinus—The Closest Ancestral Proxy of Antarctic Cryonotothenioids
Source: MDPI journal article supplement (doi:10.3390/genes14061196), 2023-05-30
Supplement: s1 [file s1]

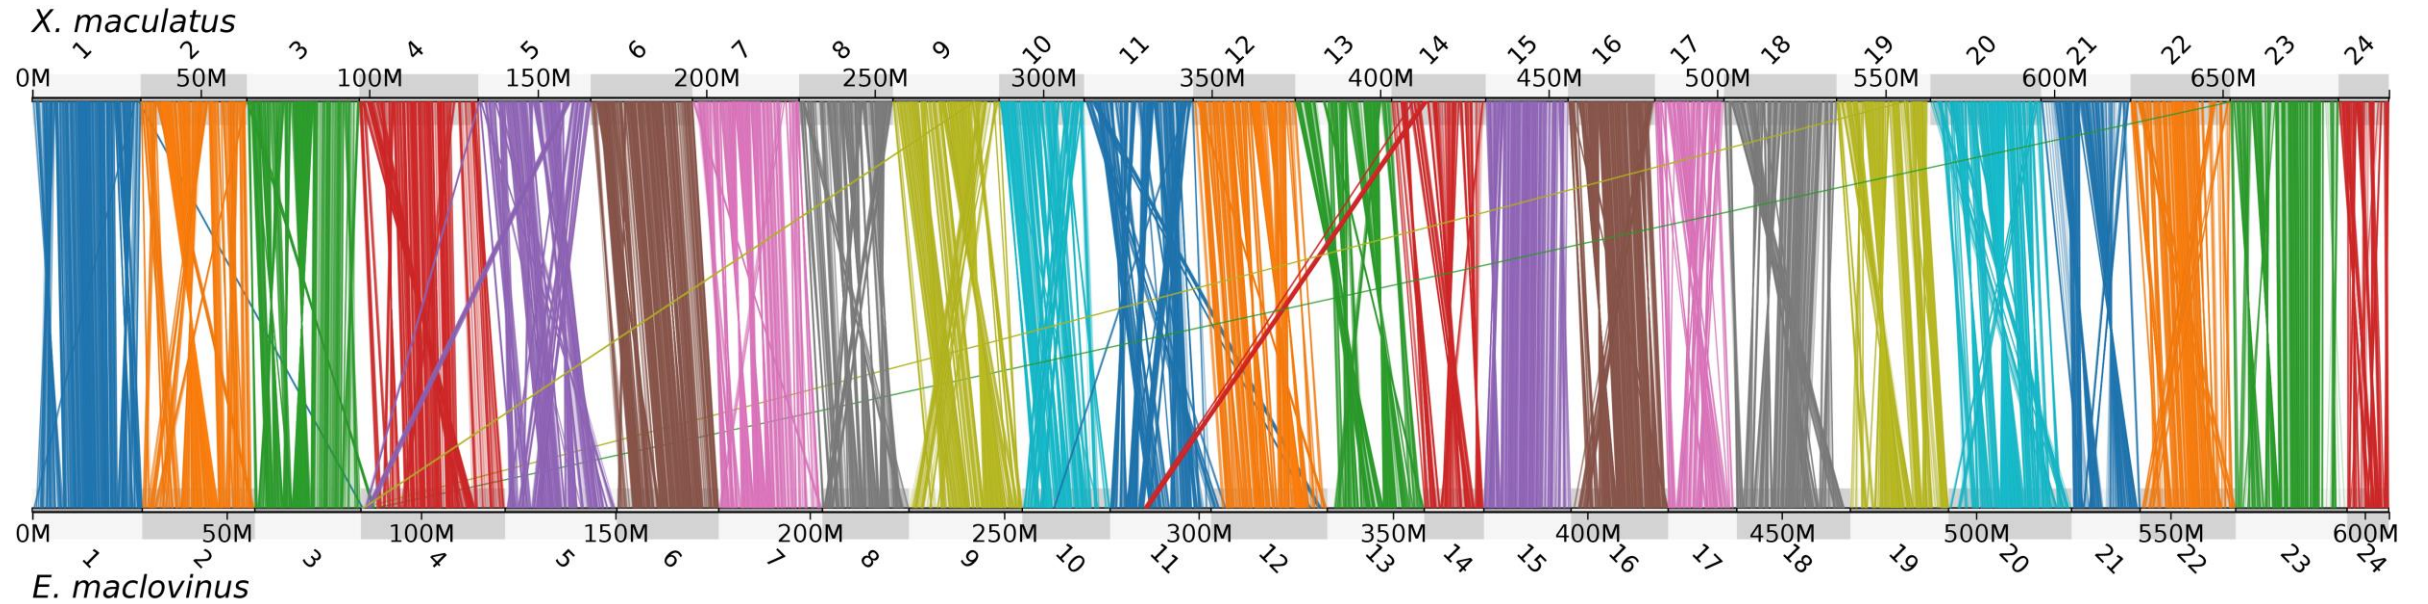

**Fig. S1: Conserved genome-wide synteny between *E. maclovinus* and the platyfish, *X. maculatus*.** Genome-wide conserved synteny plot displaying orthology between the 24 chromosomes of *X. maculatus* (top) and *E. maclovinus* (bottom). Each ortholog gene pair between the two species is represented by a line color-coded according to their chromosome of origin. While synteny highlights multiple intra-chromosomal rearrangements, chromosomes largely display one-to-one correspondence between the two species. In turn, the *E. maclovinus* chromosomal scaffolds were named according to their orthologous *X. maculatus* chromosome.
