# Supplementary material for: Chromosome-Level Genome Assembly and Circadian Gene Repertoire of the Patagonia Blennie Eleginops maclovinus—The Closest Ancestral Proxy of Antarctic Cryonotothenioids
Source: MDPI journal article supplement (doi:10.3390/genes14061196), 2023-05-30
Supplement: s1 [file s1]

## Supplementary FileS1:

Transcript sequences of circadian genes in *E. maclovinus* obtained from Iso-Seq and RNAseq transcriptomes.

```
>emac_fin_isoseq_HQ_transcript/28087_arntl1a mRNA_complete cds
GGAGAAACTGGGTACCGATCGAAAATCGTTTATGTCACAGTTCTGTGGGTTGCTATTGC
ACATTACCAAGCGCTTTCAATGGATAGACCAATCTCATTTCATATGCTGGGTAGACGGGT
TGCACCAAGCTCTTTGAGGATCAAATTAATCGGGGCACAGCGACCATCAATCCGGACA
AAACTAGGTCAGGCTGAATCAGAGCAGATCAGAGCAGACCCGCTGATCCAGGCATCCC
CGGCCCGTTCCAGTTTCATATCCAGTTGAGGGCCCAAGAGTGGATGGAAGGAGATGATTT
TAACACAGAGGCTGTGATGAACATCTGTGATGACCTGATGGCAGACCAAAGGATGGACAT
CTCGTCTACAATGACCGACTTCATGTGCGCCGGCTCCACCGACCTCATCTCCAGTCCAT
CAGCAGCGCCGGCATGGAATACACCCGCAAGAGGAAGGGCAGCACCACCGATTACCAAT
TGATGGCTTCTCATTTGATGACATGGATCCAGACAAAGACAAACTGGGAGGTGACCAACA
GGGCGGGATTAAGAATGCCAGAGAGGCTCACAGTCAGATCGAGAAGCGGCGCAGGGACAA
GATGAACAGCTTCATCGACGAGCTGGCTCTCTGGTGCCACCTGCAACGCCATGTCCCG
CAAACGGACAAGCTGACGGTGTGCGCATGGCCGTCCAGCACATGAAGACACTAAGAGG
TGCAGCCAACCCGTACACAGAGGCCAATACAAGCCCTCCTTCTGTGCGACGAGGAGCT
GAAGCACTTGATATTGAGGGCGGCTGATGGCTTCTGTGGTGGTGGTGTGACCGCGG
GAAGATCCTCTTTGCTCTGAGTCCGCTTCAAGATTCTCAACTACAGCCAGAATGACCT
GATAGGTCAGAGTCTGTTTGACTACCTTCAACCCAAAGGACATCGCCAAGGTCAAGAGCA
GCTGTCTCTTTCAGACACAGCCCTCGAGAGCGGCTCATCGATGCTAAAACCGGTCTCCC
AGTGAAGACGGACATCAACCCCGGCCGCTCCAGACTCTGCTCTGGAGCCAGACGCTCGTT
CTTCTGCAGGATGAAGTGCAACAGGCTTCCGTCAAAGTGGAGGACAAAGACTTCCCTC
CACCCTGCTTCAAGAAAGAAAGCCGATCGTAAGAGCTTCTGACCATCCACAGCACGGGCTA
CCTGAAGAGCTGGCCCCCACCAGATGGGTCTGGACGACGACAACGAGCCGACAACGA
GGGCTGCAACCTCAGCTGCCTGGTGGCCATCGGCCGGCTGCATCCCCACATTGTCCCCCA
GCCCAGCTTGGCAGACATCCGGGTGAAGCCACCGAGTATGTCTCCAGACACGCCATCGA
CGGGAAGTTTGTCTTCTGTCAGCAGAGAGCCACAGCCATCTGGCTATCTCCCCCAGGA
GCTGCTGGGAACCTCCTTCTATGAGTATTTCCACAGGACGACATGGACACCTGGCAGA
GTGTCAAGACAGGTGCTGACAGATGAGAGAGAAGATCAACACCAACTGCTACAAGTTCAA
GATCAAAGACGGCTCCTTCATCACGCTGAGGAGCCGCTGGTTAGCTTCATGAACCCCTG
GACCAAGGAGGTGGAGTACATCGTCTCCACCAACACCGTCTGTGCTGCTCTATGATGGA
GGGACCGGACTACCTCAGTCTGCTGCCCTCCCTCAGAGCATGGACAGTGTCTCACCTC
AGAGGGTGGAGGGAGGCGGCGCTGCAGACGGTGCCTGGCATCCCCGGGGGACAAGAGC
AGGAGCGGGGAAATAGGACGCATGATTGCAGAGGAGGTGATGGAGATCCAGAGGATCCG
AGGCTCCTCCCCCTCCAGCTGTGGCTCCAGCCCTTGAACATCACCAGCACCCCCCACC
TGACACCTGCTCCCCAGGGGCAAGAAGATTCAGAACGGTGGGACACCTGACCTGCCAAA
CACAGGGATCCTTCTGGACCTGACTCGGTGGCTACCCCTACTCCAACCAAGTCCATCAT
GAGTGACAACCTCCACCTGAGTATAGACATCATGGACGAGCCGGGCTCCAGCAGCCCCAG
CAACGACGAGGCGGCCATGGCGGTATCATGTCCCTGCTGGAGGCCGATGCCGGCTGGG
GGGGCCCGTGGACTTCAGCGACCTGCCCTGGCTTTGTGAGGAAGCTGGGTGGAGAGGAG
GAGGCGGGGACTCTGTGACGAGAGCCGTGGTGAGAGAGTTCACTCAGGGTGAAGTCTGAC
TGTTCCCCGTCCCCGACTCCCCCGCAGAGACATCATTAACAGATATATCATCCAGTA
GAGAGGCTGCAGGACTACAGGGGGTCTTTCAGTCCGGACAGATCACACCTACTCTTTTG
TTTATCATTTCCCTGTAGGGGGGACTGTTATTATACAGAAATCTCCCAAAGGTTAAGATG
ATTTCTACAGTGTTAGGGTCTGCACACTGTTTCAGCCGTGGGGGGGAGATCTCTAGGTAC
AGGACCCCGCTGCTAATCAATGAAGGACTGGACTCTGTCTCACTATGGCTCTGGGCCCTTC
ACTGTACAGCCCCCTCCACCAACACAGGACTCTGAGGCGTCACTAACGCTGGCTGAAG
TTTGTGTGGGGGCGGGGGGGGGGGTTGATGCCGTACACACAGGCTAAGGTGCACCCC
CCCCCCCCCATCTGACAATAATGTATCAAATCTTTAAATATTATCATGTTAAGAGTAT
ACTTTATGCAATATATATGAGTATGATGAGTATTGTATGTATCAGCAGTGAATATT
TTTAAATAAAATAATTTGTTCTGTCT
```

```
>emac_fin_isoseq_HQ_transcript/9158_arntl2 mRNA_complete cds
AGAATCGTTTCCCTCCGGTCTCTACTCTGCCCTGATTGCACAGCATACAGCTACCTCCG
TGCGCTTTTCCCTCTTTTTCTTTCATTGGGGAATACAAGGCAGTTTTTCATCCTTGTG
CCACCGTCTCGGCTCCCCACTCCCCGCCCTGTTATCACAGCAACCCCCGGAGCAGTCG
ACCGCTCATTTCATGATTGGAGTCCCCCGCGCACCGGCTCCGGCTCCAGCCATGTCCGGC
CAGGAATGCAGCGGCTGGCGCGGTGACAGAGTGGGAGGCGAACCGGAGATGTGCTGGT
TGAGGACAAACAGAGTATTCTGTGTCATTGCCAGCCGATGACCCGGCCTCAGTGC
TGGCATGTCTTGGATGGAGTGCCCGGAAGCGTAAGGGCAGCGTGGACAACAGGA
TACAAAATCTGCTTCAATGGATATGGACATTGAAGACTTGAAGAGAGGACACAACGGGTC
CGATGGTGAGGACCAACATGTCAAATGAAATGCTTCAGGGAACACACAGCCAAATGA
GAAGAGGAGACGGGACAAAATGAACAATCTCATTGACAAACTATCAGCCATGATCCCTAC
GTGTAACCCATGTCCCGTAAGCTGGACAAACTCACTGTTCTCCGAATGGCCGTGACAGA
CCTCAAATCTCTCAAAGGTTTCAAGGTTCTTTTCTGAAGCCAACACAAGCCCTCATT
CCTTCCAACGAGGATCTCAAACATCTTATCCTCAAGGCTGCGGACGGGTTCTGTTGT
AGTGGGCTGTGACCGTGGGAAAATTGTGTTGTCTCAGAGTCCGTACGAAGATATTA
```

TTATAGTCGGGCGGAGCTGATTGGACAGAGTCTGTTTGATTACATTCACCCAAAGGACAT  
 GGGAAAAGTGAAGGAGCAGCTGTGAGCCTCTGAATTATACCCCTCGTGAACGGCTAATAGA  
 TGCTAAAACCGGTCTGCAGGTCCAGGCTGACCTCCCGTCGGTGCAGCAGCTGTGTAC  
 AGGCGCAGGCGCTCATTCTTCTGTCGATGAAGATAAACAAGATTTGTGTCAAAGTAGA  
 GGAGAAAGGAATTCAGCCAGCACCTCCAAAAAGAAAGAGTCCAGAAATCTGCACGGT  
 CCACTGTACAGGCTACATGCGCAGCTGGCCACCACTGAGTTGGGAGCTGAGGGAGAGGG  
 CGATGCAGACAAGCAGGACAGCTCACACTTCAGCTGCCGTGGTGGCGGTGGGACCGCTCCA  
 CTCCCACTCCACTGCCAGGTTAATGGAGAAGTCAGAGTAAAACCCACAGAGTTCATCAC  
 ACGCTACGCCATGGATGGCAAATTCACCTTTGTGATCAAAGAGCGACAACCATTCCTTGG  
 TTATCTTCCCCAAGAACTGCTAGGGACATCATGCTACGAGTACTTCCATCAAGACGACTT  
 ACCGCAATTTAGCTGACAGACACCGAAAAGTGTGCGGAGTAAAGAAAAAATTGAGACAAA  
 CTGCTATAAGTTCAAAACGAAAAGTGGCTCTTTCTGCTACTCTGCAAAGTCAGTGGTTTAG  
 TTTTGTAAATCTTTGACCCAAAGAAGTGAATACTTAGTGTCAACAACACAGTTATATC  
 GTATGATAACAGTCAAGCTCGGTGAGGAAGCAAGTCTGAACAGTCAAGCAATTCCAA  
 GACCTCTGAAGATGGCAAGAAGTCCCTTCCAGTTATACCAGGCATCTCCACCACAAGTGG  
 AGCTATGATTTATGCTGGGAAGCATCGGACCCAGATTGCCAATGAGCTGTGGATTCCAA  
 CAGGATGAAGTCTTACCTTCCAGTGGCAGCGTCAGCCCTTTCAGTCTATCCAGGACAA  
 ATGTCCCCACAATCAGATCAGCAACAATGTGCCAAACGGAGAGGCAACAGACATGGAGAT  
 TGCAGGAAAGTCCAGCTCAGAGGAGGATGCTCAAGGAGCTACATTCTCAGGAGCCGAGTC  
 TCTCATGGGGGAGAATCCCCAGATGGATTGGACAGCGTGGTTGGACCGGGCCTTGGCAG  
 TCTCAGCAGTGACGAAGCAGCCATGGCAGTCATCATGAGCCTCTGGAGACGGACACAAA  
 CCTGGGCGATGCCGTGGACTTTGAAGAGATGCAGTGGTCTTATAGAATCTGCTCTGAGA  
 GTGTGAGACACCCGCAACACACTGAAAAACACTTGAACCTCTATTTTGTGATGAGAACTG  
 CTTGAATCTCCCTCTTAAGACTTGGCATTCTTTTGTATTTATTAGTTGAGTTTGT  
 CCACATCAGCTGTGTAGTCTTTGTGTGGCTCTGTAGCAGGGAGCGGGATCGACCTCAAT  
 AAGGGACGCTGTTGACCTCGTCAGGATGAGGATGCGCCTCTAAAGCCTTACAGCGGTCT  
 TGCTTGGCTTCAACAGCTGTCCCTCACACCTACTGTCATCTCTCAAGGCTGAAGAAC  
 CCATGAACACTATTGAAAAAGTGGCTTGGGATTTTCTCTCCACCTACATTTTAACTAAGGA  
 TGGGCTGACGATGCAAGAAAAACAAGATTGCACTGAGTTTTCTTTTAAAGGTTGTCTAT  
 TTAAGTACTGATGTTTAAATGAAAATACAAGAACGACAACCTGTCCCTCTCTGTG  
 ACCCCTCAGGATCCTAGCCGTAGGTAGCCAGTGTAACTGGCAACACACTTCCATAA  
 CCTCAAACTTTGAGAGTCACCTAATGGTGAGCCACTCGGAGATTTTCTCTGTGATATC  
 TGAACATTTTCCACGGAACAGTCCAGCAACCTCTCACTTGAACATGCTGTATACGTGT  
 GGATTTGGTATGAGATTTGCAAAACATCATGTCTCAAGCCATATCTGTCTTAAAGGGACA  
 GTTGTGATGAAGAATATTTTATTTTGGTATGTACACTTCTATGTACATCTAATAT  
 AGCCCTGGATTTTATTCCTCAACTCTAAACATTTAACATGTATTGCCAGAAATTATCAG  
 TCTATTATTGAGAGCATCCACTACTGATGGTTACCAAATCTTGAAGTATTTTGTGAGCA  
 CTACAGAATCCCTTCAAGCTAAGTGAAGAACACAAAGGAGTCTCTGTTGGCAACGGT  
 GAGCAGCAAAACGGTTTCAAACTGTGACTTTTATCAATACATGTTGGTTGACATTTGA  
 GTCTGACGGTAGAAGTTGAACCTCAGGATGTAATGGAACAGAGCTGCCACGATTAAACA  
 TGGACTGCAGCAGTTGTCTTCAATGTCTGAAATCTATCTACATACTCTTCTAGTAAT  
 TAGTCTGTAGTGGTTACCTGTGTGTTGTGTTCTGACCTTATCATCAGCGTTATAATC  
 TCGCAGGTAAAGCGTAGCTTTAGCTGGTTTCTCCTGCACTTCCACTGTATGAGTCTTTCA  
 AAATACATGTTTATGTGCTTGTAGAGGCACACAACCTTTTTCATAGATACATTATGGCTT  
 CACGATATGAGGAGAATATAAGATATGTGATAAGATTGAATATCGCGCTAACTATATTAC  
 TTGAGTTAAATAAACAGATATTAAGTCTGTTCTGCCTTCTGCTGCTTTCAGTACATTG  
 CTAAAAACAACAGATTGCATGTTGACTTGACAGGAAATATTCTTTTATGAACAAATT  
 GAAGTGAACACC

>emac\_fin\_Isoseq\_HQ\_transcript/7059\_clockb mRNA\_complete cds  
 GACCGACTCGATGCAACGTTCAAGTAAGCAAAACACGGAGGCTGCTGTCGATTACTCAGG  
 AAGGTGAGGTGTGGCTCACCATGAAGAGTTGTGAGTGCCTGGAAGGATAGGATCTTAAT  
 TAGCTTTTACATTCAGAAAGTTTGGTATCGCCATGTCTTTCTGTGGCCCGTTGTCTCT  
 CTCGTGACCCCAATGACCTCAACAGCAGTTTGGACCATAGAGTCAGCTTTGACCCCTAC  
 CTTTCTCTGACCCCTGAGAAAAGACATTCAAGTACGACGTCAGTAAAGCTGTGTTGGGT  
 GGTCTTCCAAATGCCTACCTCACGCCATAAGAGCAATCACTGCAGCCACAGGCTGATC  
 AGCAGCTACCATGACATCAAGCATAGGGGATGATTGTAGCATCTTTGATGGGTTGATGGA  
 AGAAGATGAAAAGGACAAAGCAAAACGCGTGTCCGTAACAAGTCTGAGAAGAAGCGGAG  
 AGACCAAGTTCAATGTCTCATCAAGGAACTCGGCACGATGTTGCCGGGCAACACCAAGAA  
 GATGGACAAGTCCACCATCTGCAGAAAAGCATTGACTTCTGTGTAACACAAAGAGAT  
 TGCAGCCAGTTCGAGTGCAGTGCAGTACAGGAGGACTGGAAGCCTCCATTCTCAGCAA  
 TGAGGAGTTTACCCAGCTCATGTGAGGAGCTCTGGATGGATTCTTTATAGCAATAATGAC  
 TGATGGGAACATCTCTACGTCTCTGAGAGTGTACCTCACTACTTGAACATCTACCGAC  
 TGACTTGGTGGACCAAGAACCTGTTAAACTTCTGCCACTCGGGGAACACTCTGATGTGTA  
 CAAGGCGCTGTCCACACACCCACCGACACGACAACCTTAGCTCCGATTACCAAAAGAC  
 TAAGAACCACATGGAGTTCTGCTGCCATATGCTGCGAGGGGCCATTGACCCCAAGAACCC  
 GCCCGTCTACGAGTATGTCAAGTTCAATGGCAACTTCAAGTCCCTCAACAATGTTCCCAA  
 CGTGACGAGGAATGGTCTAGCAGGGGTGTTACAGCGCTCACTGCAGCCTGCGTTGCAGCA  
 CCAGGTGTGCTTGTAGCCACAGTTGCGCTGGCCAAACCTCAGTTTCAAGGAAATGTG  
 TACAGTGGAAGAGCTAATGAAGAATTCACCTCGAGGCACAGCTAGAATGGAAGTTCCT  
 CTTCTTAGACCAAGAGCTCCACCAATCATAGGCTACCTGCCGTTGAGGTTCTGGGAAC

ATCAGGGTACGACTATTACCATGTGGACGACCTGGAGACATTAGCCAAGTGTACGAACA  
 CTTGATGACGTACGGTAAAGGAAAGTCTTGCTACTATCGTTTCTGACTAAAGGTCAACA  
 GTGGATCTGGCTTCAGACGCATTACTACATCACCTATCACCAGTGGAAGTCTCGACCTGA  
 GTTTATCGTCTGTACGCACACAGTAGTCAGTATGCAGAGGTAGGGCCGAACAGCGCAG  
 AGAGCTGGGCATTGAAGAGTCCAACCCGGAAGGGACTGTGAATAAGAGTCAGGACTCGGA  
 GTCAGAGTCACAGCTGAATACCTCCAGCCTCAAGGAGGCTCTGGAGCGATTGTATCGCAG  
 CCGAACGCCCTCAACATCTCTACGAAGTCTCGGAAGTCTCTGTCGATGTCTCTGACAA  
 CACTTGCACCTCTCTAAGCTACACATGGACACAGCCACACCTCTCTGGCAGTCCATGGC  
 CTCCACCATGGTGATGACGTACAGCGGCGCTCATCAATCAGCAGCCAGTCGATGAGCTC  
 TCAGACCACGAGCCAGAGTGTAACTCCAGGGATGATCACTCAGCAGCAGCAGCAGCAGCA  
 GCAGCAGCAACAACAACAGCAACAACAGCAACAACAACAACAGCAACAGCCACA  
 ACAGCAACAGCCACAGCCACAACAGGCAAACTACAGCCGGTGATGGAGTTCTCAGCGCA  
 GGTGAATGCCATGCAGCATCTGAAGGATCAACTGGAACAGAGGACAAGACTAATCCAAGC  
 CAACATCCAGCGGCAGCAGGACGAGCTGAGACACATCCAAGACAGCTGCAGAGGGTGCA  
 GGGACAGGGCATAACAGATGTTGTTGCAGCAGCAGGAGGAGCGATGAACGTGCAGTCCC  
 TCAGATGGGGTCCGTCACAAACAGCCAACCTTGACCAACCAGGTCCAGCAAAACAACAT  
 TAACCCCGTCCATTAGGAACACAGCAGCTCACCATCCAGCAGCAGGCCCCGCCCCCA  
 GCAGAACATACAACAGCAACAACAGCAGCAGACCAATGCACTCACACAGCCCCAGCTCAGCC  
 CCAACAACCTCCGAGGCTCAGCCCCAGACCCAGGGCTCCGTTTCTGCTCACTCTACAA  
 CACCATGATGATTTCCAGCCCGGGCAGCCCAACGTGCTGCAGATCAGCACCAGCTTGCC  
 GCAGACCAACACACAGCAAGGCACCGCGGTGGCAACCTTACACAAGACCAGAGATCCG  
 CTTCCAGCAGGGCAGCAGCTGGTGACCAAGCTGGTGACGGCGCCAAATGGCTGTGGAGC  
 AGTGATGGTGCCCACTCCATGTTTCATGGGGCAGGTGGTCACTGCCTACAACCCCTTTGG  
 TGGACAACAGCAGGGGGGCGAGACACAGACCTGACCTGCAACCAGCCAGCCCCCA  
 AGGTACGCCTGATGGCCAGAACCAGACCACGTAGTGGCACAGGGCGGGCAGCAGGGGCA  
 GCAGCAACAACAGCAATTCTTACAGGGCACTCGTCTTCTCCACAGTAACCAAGTCTACCCA  
 GCTGATTTCTGCAGGCAGCTTTCCCACTCCAACAACAGGGCACTTTACACAGGCAACTCA  
 TCAACAGCAACCAACAACAGCAACAACAGCAACAACAACAGCAACAACAGCAGCAACA  
 ACAACAACAGCAACAACAGCAGCAACGGCAACAGCAGCAGCAGCAACAATCCACCACCA  
 GAGGCACCAGCAGCAGCTGAAACCTCAGCCCCAGAAACCGCAGAAAGCCCCATCGTCGCA  
 CAGGACTGAGAGTGTGAGCAGCCAGCCGAGTGAAGTCTGGAGGAGAAAAATTGGGATT  
 TAGAAGCTCGAGGGGAGTTGCTGCGTATATTGGTTTGTTCACCTGGCTGTCGCAAAAGT  
 CATTTTCCCCAAAAATGTGTCGTCCTCTCTCCATCTGAAAGAAATTAATCATAGG  
 AAAGAGGAGAGCCCGTGAGTCTCAAGGAACCTCACCATAGATTGTACCATGGCAACAGG  
 ATTGATTCAAATCCACCAATTGTGAAGGAAGATCCAGTCTCCGTGGAACCTGACAAAAA  
 TACAAAGAACACCTTATCGCATGGTAACAACAGATTGTTTCGAAGGTGTGTCAAAGTGG  
 ACTGTGACCTTGTAGAGATTACTGTATGATAAAAGAAAACTTGTAAATATCATATATA  
 GCCTAACAGAAAAACAGAAATGTAGTATTTATATGATTGCATGGAAGAAAACTGTGT  
 AAGCTTTTATTAGTCGCTTTTGAATAATTGAATTTTACTTTGTTCAAGTGTTTCTGCTC  
 AAAGATGGAGCAATGACATGCTCTGTCAATCTTCTCCACCCCTTCTCTTAACAAAAA  
 ACACGGTTTCGGAATAAACACGGCTTTAAAGTCTGCAAGTTTGGTTGGGTTTGGGTTTTT  
 GTGGAAGTTGTGTTTTTAAACACTGTGTCTCTGAGACAAAAATGGCTCTTTTAACTTTG  
 TAAGTACAAATTATCTTTGGC

>emac\_fin\_isoseq\_HQ\_transcript/7712\_clockb mRNA\_complete cds  
 GGCGCATGACTGTACGTCGTAATATGAAGTAGGCCCTCTGTTTTTCTCCCAACCCGGAG  
 TCCTCCGAGCCCCACCGACTCGATGCAACGTTCAAGTAAGCAAAACACGGAGGCTGCTG  
 TCGATTACTCAGGAAGGTTTGGTATCGCCATGTCTTCTGTGGCCCGTTGCTCTCTCGT  
 GACCCCAATGACCTCAACAGCAGTTTTGACCATAGAGTCAGCTTTGACCCCTACCCCTTT  
 CTTGACCCCTGAGAAAAGACATTCAAGTACACGTCGATTAAGCTGTGTTGGGGTGGTCT  
 TCCAAATGCCTACCTCACGCCTAAAGAGCAATCACTGCAGCCACAGGCTGATCAGCAG  
 CTACCATGACATCAAGCATAGGGGATGATTGTAGCATCTTTGATGGTTGATGGAAGAAG  
 ATGAAAAGGACAAGCAAAACGCGTGTCCCGTAACAAGTCTGAGAAGAAGCGGAGAGACC  
 AGTTCAATGTCTCATCAAGGAACCTCGGCACGATGTTGCCGGGCAACACCAGGAAGATGG  
 ACAAGTCCACCATCTTGACAGAAAAGCATTGACTTCTGTGTAACACAAAAGAGATTGAG  
 CCCAGTCGGAGTCGAGTGAAGTCAAGGAGCTGGAAGCTCCATTTCTCAGCAATGAGG  
 AGTTCAACCCAGCTCATGCTGGAGGCTCTGGATGGATTCTTTATAGCAATAATGACTGATG  
 GGAACATCTCTACGCTCTGAGAGTGTACCTCACTACTTGAACATCTACCGACTGACT  
 TGGTGACCAAGAACTTTAAACTTCTGCACTCGGGGAACACTCTGATGTGTACAAGG  
 CGCTGTCCACACACCCACCGACCAACCTTAGCTCCGATTACCAAAAGACTAAGA  
 ACCACATGGAAGTTCTGTGCGCATATGCTGCGAGGGGCCATTGACCCCAAGAACCGCCG  
 TCTACGAGTATGTCAAGTTCATTGGCAACTTCAAGTCCCTCAACAATGTTCCCAACGTGA  
 CGAGGAATGGTCTAGCAGGGGTGTTACAGCGCTCACTGCAGCCTGCGTTGCAGCAGCAGG  
 GTGCTTCTGTAGCCACAGTTTCGGCTGGCCAAACCTCAGTTTCAAGGAAATGTGTACAG  
 TGGAAGAGCCTAATGAAGAATTACCTCGAGGCACAGCCTAGAATGGAAGTTCTCTTCT  
 TAGACCACAGAGTCCACCAATCATAGGCTACCTGCGGTTGAGGTTCTGGGAACATCAG  
 GGTACGACTATTACCATGTGGACGACCTGGAGACATTAGCCAAGTGTACGAACACTTGA  
 TGCAGTACGGTAAGGAAAGTCTTGTCTACTATCGTTTCTGACTAAAGGTCAACAGTGA  
 TCTGGCTTCAGACGCATTACTACATCACCTATCACCAGTGGAACCTCTGACCTGAGTTTA  
 TCGTCTGTACGCACACAGTAGTCAGCTATGCAGAGGTGAGGGCCGAACAGCGCAGAGAGC  
 TGGGCATTGAAGAGTCCAACCCGGAAGGGACTGTGAATAAGAGTCAGGACTCGGAGTCAG

AGTCACAGCTGAATACCTCCAGCCTCAAGGAGGCTCTGGAGCGATTGATCGCAGCCGAA  
 CGCCCTCAACATCCTCAGAAAGTTCTCGGAAGTCTCGTCGATGTCTCTGACAAACATT  
 GCACCTCCTCTAAGCTACACATGGACACAGCCACACCTCCTCGGCAGTCCATGGCCTCCA  
 CCATGGTGATGACGTACAGTCAGCGGGCTCATCAATCAGCAGCCAGTGCATGAGCTCTCAGA  
 CCACGAGCCAGAGTGTAATCCAGGGATGATCACTCAGCAGCAGCAGCAGCAGCAGCAGC  
 AGCAGCAACAACAACAACAACAACAACAACAACAACAACAAGCAACAGCCACAACAGC  
 AACAGCCACAGCCACAACAGGCAACGTACAGCCGGTGATGGAGTTCTCAGCGCAGGTGA  
 ATGCCATGCAGCATCTGAAGGATCAACTGGAACAGAGGACAAGACTAATCCAAGCCAACA  
 TCCAGCGGCAGCAGGACGAGCTGAGACACATCCAAGACCAGCTGCAGAGGGTGAGGGGAC  
 AGGGCATAAGATGTTGTTGTCAGCAGCAGGGAGGAGCGATGAACGTGCAGCTCCCTCAGA  
 TGGGGTCGGTCCAAACAACAACCAACTTGACCAACCAGGTCCAGCAACAACAATTAAACC  
 CCGTCCATTAGGAACACAGCAGCTCACCATCCAGCAGCAGGCCCCGCCCCCCCAGCAGA  
 ACATACAACAGCAACAGCAGCAGCAACGCCTCACACAGCCCCAGCGTCAAGCCCCAAC  
 AACCTCCGCAAGGCTCAGCCCCAGACCCAGGGCTCCGTTTCTGCTCCACTCTACAACACCA  
 TGATGATTTCCAGCCCCGGGCAGCCCAACGTGCTGCAGATCAGCACCAGCTTGCCGCAGA  
 CCAACACACAGCAAGGACCGCGGTGGCAACCTTCACACAAGACCGACAGATCCGCTTCC  
 CAGCAGGGCAGCAGCTGGTGACCAAGCTGGTGACGGCGCCAATGGCCTGTGGAGCAGTGA  
 TGGTGCCCACTCCATGTTTCATGGGGCAGGTGGTCACTGCCTACAACCCCTTTGGTGGAC  
 AACAGGGGGGGCAGACACAGACCTTGACCTGCAACCAGCCAGCCCCCAAGGTGAGC  
 CTGATGGCCAGAACCAGACCACTGTAGTGGCACAGGGCGGGCAGCAGGGGAGCAGCAAC  
 AACAGCAATTCCTACAGGGCACTCGTCTTCTCCACAGTAACCACTCTACCCAGCTGATTC  
 TGCAGGCAGCTTTCCACTCCAACAACAGGGCACTTTACACAGGCAACTCATCAACAGC  
 AACCACAACAACAGCAACAACAGCAACAACAACAGCAACAACAGCAGCAACAACAACAGC  
 AGCAACAACAGCAGCAACGGCAACAGCAGCAGCAGCAACAATCCACCACCAGAGGCACC  
 AGCAGCAGCTGAACCTCAGCCCCAGAAACCGCAGAAAGCCCCATCGTCGCACAGGACTG  
 AGAGTGTGACGAGCCAGCCGAGTGAAGTCTGGAGGAGAAAACATTGGGATTTAGAATC  
 GGAGGGGAGTTGCTGCGTATATTGGTTTTGTTCACTGGCTGTCGCAAGTCCATTTTCC  
 CAAAAAATGTGTCGTCCTCTTCTCCATCTGAAAGAAATTAATCATAGGAAAGAGGA  
 GAGCCCGTGAGTCTCAAGGAACTCACCATAGATTGTCACCATGGCAACAGGATTGATTC  
 AAATCCACCAATTTGTAAGGAAGATCCAGTCTCCGTGGAACCTGACAAAAATACAAAGA  
 ACACCTTATCGCCATGGTAACAACAGATTGTTTCGAAGGTGTGTCAAAGTGGACTGTGAC  
 CTTGTAGAGATTTACTGTATGATAAAAGAAAAAATTTGTAATATCATATATAGCCTAACA  
 GAAAAACAGAAATGTAGTATTTTATATGATTGCATGGAAGAAAAAATGTGTAAGCTTTT  
 ATTAGTCGCTTTTGAAATTTGAATTTTACTTTGTTCAAGTGTTTTCTGGTCAAGATGG  
 AGCAATGACATGCTCTGTAATCTTCTCCACCCCTTCTCTTAACAAAAAACACGGTT  
 CGGAATTAACACGGCTTTAAAGTTCTGCAAGTTGGTTGGGTTTGGGTTTTTTTGTGGAAG  
 TTGTGTTTTTAAACACTGTGCTCTGAGACAAAAATGGCTCTTTTAACTTTGTAAGTAC  
 AAATTATCTTTGGC

>emac\_fin\_isoseq\_HQ\_transcript/24113\_cry1a mRNA\_complete cds  
 GAGTGTGGGCGGGGTACGCTTGTAGGTGCGGCGAGAAGATTGAGCAGCAATTCGTGGAC  
 TTTGAGGAGAATTTACTCAAAACATCCGACTGACAGTGCAGGAGAAGACTCAAGCGGAAC  
 AGAGAAGGATTTATAAAAGCGACTTTTATGTTCAAGTGTGTTTAGGACGACTCTCTTGAG  
 AATATCGAAGGAAGTGTGTTTACATAACCAGCTTCCCTCTAACGCGGGCAGGAGCAGCC  
 TGTTTTCCAGGTAACTTCTGACTAAGGAACAACCTTCAATTTACAGGCTATTTAATTCCTC  
 TGCTACGTTATTGATATTCAATTTGAGTGCAGAAACGTTTTAGTACATGTATTGTTGTAC  
 AAGCTTTTTTCATCTTTAGAAAAACAAGTTATACAACGCAAAACGAGGTTACTGCCTGT  
 CAGCGGACTGGGTCTTAAAGCCGATCGGGTGCACATCGTGCCCAATGGTTCAGCAGAC  
 TACTGTTCTTAAATTTCTTGACATTATGGAAAAAGTTCTGTTAGAACAAAGGTTAATTGCA  
 AACTTGGACTGCGTCACTTAAAGCAACGAGCCGATGCTTCAATAGCATACGAGCTGAA  
 CAAGCCTACTTTCTTTTGACATTTGGATTGCTGTGAAGTATTTCCCTTCTTGATA  
 TACTGTTTTGTTTAAACAGTGAAGTGAAGTAAAGAGTACTTCTTAAATAACAAAAAAG  
 AAAAAGTAGGACTCGTCCACTTGAGTAATGGTCATTAATACGATCCACTGGTTACGGAAG  
 GGCTTGGGCTCCACGACAATCCGTGCTCAAAGACTCCCTGCTGGGGCGGATACTGTC  
 CGCTGTGCTACATTCTCGACCCCTGGTTTCGAGGATCCTCAACGTTGGGATCAACAGG  
 TGGAGGTTCTTACTGCAGAGTCTGGAGGACTTGGACTCCAGCCTCCGTAAGCTCAACTCT  
 CGACTGTTTGTGATCCGAGGCCAACCCACTGATGTCTTTCCAGACTCTTCAAGGAATGG  
 AATATTTCTCGTTTGTCTACGAGTACGACTCTGAGCCCTTTGGAAAGAACGAGATGCA  
 GCGATTAAAGAACTGGCTGTGAGGCTGGAGTGGAGGTGACCGTTTCATCTCTCCACACA  
 CTCTATGACCTGGACAAGATCATAGAGTTAAATGGGGGCCAGTCACCTCTGACCTACAAG  
 CGGTTCCAGACCTCATCAGCCGGATGGATGCGGTGGAGGAGCTGCAGACTCCATCAGC  
 GCGGACATCATGGGAAGTGCAGGACGCGCTGTCCGAAGACCATGATGACAAGTTTGGC  
 GTCCCTCATTTGGAGGAGCTGGGTTTTGATACTGAAGGTCTTTCTCCGCTGTGTGGCCG  
 GGGGAGAGACGGAAGCCCTCACACGACTTGAGAGGCATCTGGAGGGAAGGCGTGGGTG  
 GCCAATTCGAGCGTCCAGAATGAACGCCAAGTCTGCTGCTGCGCAGCCGACCGGCTC  
 AGCCCATACCTGCGCTTTGGTGCCTCTCTGCGCCTCTTCTACTTCAAACTCACCGAC  
 CTCTACAAGAAGGTGAAGAAGAACAGTCCCTCTCTCTGCTGTATGGTCAGTGTCTC  
 TGGCGCGAGTTCTTCTACACAGCAGCCACCAACAACCTTGTTCGACACAGTGGAGAGC  
 AACCCCATCTGTGTCCAGATCCCTGGGACCGAAACCCAGAGGCGTGGCCAAGTGGGCG  
 GAGGGCGCAGCCGCTTCCCTGGATCGACGCCATCATGACGAGCTGAGACAGGAGGGC  
 TGGATCCACCACCTCGCCGACATGCTGTGCTGCTTCTGACCCGGGAGACCTGTGG

ATCAGCTGGGAGGAGGGCATGAAGGTGTTTGAGGAGCTGCTGCTGGATGCAGACTGGAGT  
 GTGAACGCGGGGAGCTGGATGTGGCTCTCCTGCAGCTCTTTCTTCCAGCAGTCTTCCAC  
 TGCTACTGCCCCGTGGGCTTCGGCCGCCGACAGACCCCAACGGAGATTACATACGGCGC  
 TACCTGCCATTCTCAGAGGCTTTCCAGCCAAGTACATTTATGATCCGTGGAATGCTCCA  
 GAGAGTGTGCAGAAGGCAGCAAAGTGTATCATTGGAGTGCATTACCCCAAACCCATGGTG  
 AACCACGCAGAGTCCAGCCGGCTCAACATCGAGCGGATGAAGCAGATCTACCAGCAGCTG  
 TCCTGCTACAGAGGCCCTCGGCCCTCTGGGTTCAATTCCCTCCACTTCTAACGGTAACGGA  
 GAGACGTCCTCTGACGGGATGGGATTCTCTGCTGAGGCTACACACAACACTGCTGCAGCT  
 CCATCTGGCTATCAGATGAGCGTTCACTCGCAGGGAGATTGGCAGAGCGGCGTCATGACG  
 TTCATGCAGGGCGACACGCAAACAGCTGCAGCTCAGCAGCAGGGTTATGCAGGCACC  
 AGTAGTAGTATGCTGTGTACACCCAAGTGCACAGCAAATCCAAAGGACCTGAACAC  
 CACGTACCCCTCTGTCCGGTGGGAAAAGACTGCGAGGACCTGGGAATGGCAGAGGC  
 TCTAAAATCCAGAGACAGAGTACACACTAAGCGAGTGTGTGCAGTCAGACCAAGGACACA  
 GCCAACACAAAAATGGACATTTTGTCTCAGCACTTCAAGATGAGCAACACAAACAAGACT  
 GAATATTATAATGTGGACTGCACGGCACTGCGACGTGCAGACGACTCAGAAGCAACTCTG  
 TTCTTTTCTTTGGGTAAACATAGCCATGACAACGGTCTGTGTATATAATGAATTTGCT  
 CATTTGACATACAACTTGATACATTTGAATATTGTATGTGTGTTTTCTCTCACTGTGTA  
 GCCATAGACCCATTGATATATTTTGTATATGAAATCATTTGGATGGATCTTTGTTTT  
 TTTTAAATATTGATTAAAAACAACCTTTGTAATATGTC

>emac\_fin\_isoseq\_HQ\_transcript/13334\_cry1a mRNA\_complete cds  
 AGGTGCGCGGAGAAAGATTGAGCAGCAATTCGTGGACTTTGAGGAGAATTTACTCAAAACA  
 TCCGACTGACAGTGCAGGAGAAAGACTCAAGCGGAACAGAGAAGGATTATAAAAGCGACT  
 TTTATGTTCAAGTTGTTTTAGGACGACTCTCTGAGAATATCGAAGGAACGTGTTTACA  
 TAACCAAGCTTCCCTCTAACCGCGCGAGGAGCAGCTGTTCCACGGTAACCTTGACTA  
 AGGAACAACCTCAATTTACAGGCTATTTAATTCCTCTGCTACGTTATTGATATTCAATTC  
 GAGTGCAGAAACGTTTTAGTACATGTATTGTTGTACAAGCTTTTTTATCTTTTCAGAAAA  
 ACAAGTTATACAACGAAAACGAGGTACTGCTGTGCAGCGACTGGGTCCTAAAGCCGA  
 TCGGGTTGCACATCGTGCCCAAATGGTTCAGCAGACTACTGTTCTTAAATCTTTGACAT  
 TATGGAAAAAGTTCTGTTAGAACAGGTTAATTGCAAACTTGGACTGCGTCACTAAAAAG  
 CAACGAGCCGTATGCTTCAATAGCATACGAGCTGAACAAGCTACTTTTTCTTTGACATT  
 TGGATTTCGTGTGAAGTGAATTTCCCTTCTTGGATATACTGTTTTGTTAACAGTGAGTC  
 GGAGTAAGAAAGTAGACTTCTTAAATAACAAAAAGAAAAAGTAGGACTCGTCCACTTGA  
 GTAATGGTCATTAAACGATCCACTGGTTCAGGAAGGGCTGCGGCTCCACGACAATCCG  
 TCGCTCAAAGACTCCCTGCTGGGGGCGGATACTGTCCGCTGTGTCTACATCTCGACCCC  
 TGGTTCGCAGGATCCTTCAACGTTGGGATCAACAGTGGAGGTTCTTACTGCAGAGTGTG  
 GAGGACTTGGACTCCAGCTCCGTAAGCTCAACTCTCGACTGTTTGTGATCCGAGGCCAA  
 CCCACTGATGTCTTTCCAGACTCTTCAAGGAATGGAATATTTCTCGTTTGTCTACGAG  
 TACGACTCTGAGCCCTTTGGGAAAGAACGAGATGCAGCGATTAGAAACTGGCCTGTGAG  
 GCTGGAGTGGAGGTGACCGTTCGCATCTCCACACACTCTATGACCTGGACAAGATCATA  
 GAGTTAAATGGGGGCCAGTCAGCTCACCCTGACCTACAAGCGGTTCCAGACCTCATCAGCCGG  
 ATGGATGCGGTGGAGGAGCTGCAGACTCCATCACGGCGGACATCATGGGAAGTGCAGG  
 ACGCCGCTGTCCGAAGACCATGATGACAAGTTTGGCGTCCCTCATTGGAGGAGCTGGGT  
 TTTGATACTGAAGTCTTCTCCGCTGTGTGGCCGGGGGAGAGACGGAAGCCCTCACA  
 CGACTTGAGAGGCATCTGGAGAGGAAGGCGTGGGTGGCCAACCTCGAGCGTCCGAAGTGA  
 AACGCCAATCGTGTCTCGCAGCCGACCGGCTCAGCCCATACCTGCGCTTTGGCTGC  
 CTCTCTGCGCCTCTTCTACTTCAAACCTACCGACCTCTACAAGAAGGTGAAGAAGAAC  
 AGCTCCCTCTCTCTCGCTGTATGGTCAAGTGTCTGCGCGGAGTTCTTACACGGCA  
 GCCACCAACAACCTTGCTTCGACACGATGGAGAGCAACCCATCTGTGTCCAGATCCCC  
 TGGGACCGAAACCCAGAGGCGCTGGCCAAAGTGGGCGGAGGGCCGACCGGCTTCCCTGG  
 ATCGACGCCATCATGACGAGCTGAGACAGGAGGGCTGGATCCACCACCTCGCCGACAT  
 GCTGTGCGCTGTCTTCTGACCCGGGAGACCTGTGGATCAGCTGGGAGGAGGGCATGAAG  
 GTGTTTGAGGAGTGTGCTGGATGCAGACTGGAGTGTGAACGCGGGCAGCTGGATGTGG  
 CTCTCTGCACTCTTTCTTCCAGCAGTTCTTCCACTGCTACTGCCCCGTGGGCTTCGGC  
 CGCCGCACAGACCCCAACGGAGATTACATACGGCGCTACCTGCCATTCTCAGAGGCTTT  
 CCAGCCAAGTACATTTATGATCCGTGGAATGCTCCAGAGAGTGTGAGAAGGCAGCAAAG  
 TGTATCATTGGAGTGCATTACCCCAAACCCATGGTGAACACGCAGAGTCCAGCGGGCTC  
 AACATCGAGCGGATGAAGCAGATCTACCAGCAGCTGTCTGTACAGAGGCTCGGCCTT  
 CTGGGTTCAAGTTCCCTCCACTTCTAACGGAACGAGAGACGTCCTCTGACGGGATGGGA  
 TTCTCTGCTGAGGTACACACAACACTGCTGCAGCTCCATCTGGCTATCAGATGAGCGTT  
 CACTCGCAGGGAGATTGGCAGAGCGGCGTCATGACGTTTATGAGGGCGACACGCAAACC  
 AGCTGCAGCTCAGAGCAGCAGGTTATGCAGGCACCAAGTAGTAGTATGCTGTGTACACC  
 CAAGGTGCACAGCAAATCCAAAAGGACCTGAACACCACGTACCCCTCTGTCCGGTGGG  
 AAAAGACACTGCGAGGACCTGGGAATGGCAGAGGCTCTAAAATCCAGAGACAGAGTACA  
 CACTAAGCGAGTGTGTGAGTCAGACCAAGGACACGCCAACACAAAATGGACATTTTG  
 TCTCAGCACTTCAAGATGAGCAACACAAACAAGACTGAATATTATAATGTGGACTGCAGC  
 GCATGCGACGTGCAGACGACTCAGAAGCAACTCTGTTCTTTTGGGTTAACATAGC  
 CATGACAACGGTCTGTGTGTATATAATGAATTTGCTCATTGACATACAACTTGATACATA  
 TTTGAATATTGTATGTGTGTTTTCTCTCACTGTGTAGCCATAGACCCATTGATATATTTT  
 TGATATATGAAATCATTTGGATGGATCTTTGTTTTTTTTTAATATTGATTAAAAACAAC  
 CTTTGTAAATGTCTATTCAAGAACAATTCAATTTGATAAATCTGTATCTATCTTAATA

TATTTTCTGTTCTTATTGTACTTTCTATTATACTCGAGATGTATATCAACAAGTGTT  
 TCAATCATTCCCTTTCTCTTCTGCTTCTGACTTTAATCCTCACCCTCTAGAGGCAATA  
 TCAGTTTAACATCAAGTTGTTGCCAGATCTGCTGTTACTGAAAGAAGCCGACAGAAATAC  
 ATGTTCTTCATATCATGGTGAGCCCTGCCTCCTTGATAAGCTTCAGTAAATGTAGTA  
 CATAAGCTTCTTTGGGCACCAAGGAGCGCTATATAAATACCATGTATTAGTATTATGA  
 CATGAGAGAACTGCTTACTTGCGATTGTTCTCTCAATGTGCTTCTTAATAAACTG  
 GGTTAATAT

>emac\_fin\_isoseq\_HQ\_transcript/18412\_cry1a mRNA\_complete cds  
 GCTTGTAGGTGCGGCGAGAAGATTGAGCAGCCTGTTCCACGGTAACCTCTGACTAAGGA  
 ACAACTTCAATTTACAGGCTATTTAATTCCTCTGCTACGTTATTGATATTCAATTCGAGT  
 GCAGAAACGTTTTAGTACATGTATTGTTGTACAAGCTTTTTTCATCTTTCAGAAAAACAA  
 GTTATACAACGCAAAACGAGGTTACTGCCTGTCAGCGGACTGGGTCTAAAGCCGATCGG  
 GTTGACATCGTGCCCAAATGGTTCAGCAGACTACTGTTCTTAAATCTTTGACATTATG  
 GAAAAAGTTCTGTTAGAACAAGGTTAATTGCAAACTTGGACTGCGTCACTAAAAAGCAAC  
 GAGCCGTATGCTTCAATAGCATACGAGCTGCACAAGCCTACTTTCTTTTGACATTTGGA  
 TTCGCTGTGAACGTATTTCCCTTCTTGGATATACTGTTTTGTTTAAACAGTGAGTCGGAG  
 TAAGAAAGTACACTTCTTAAATAACAAAAAGAAAAAGTAGGACTCGTCCACTTGAGTAA  
 TGGTCATTAATACGATCCACTGGTTCAGGAAGGCTGCGGCTCCACGACAATCCGTCGC  
 TCAAAGACTCCCTGCTGGGGGCGGATACGTCCGCTGTGTCTACATTCTCGACCCCTGGT  
 TCGCAGGATCCTCCAACGTTGGGATCAACAGGTGGAGGTTCTTACTCGACAGTCTGGAGG  
 ACTTGGACTCCAGCTCCGTAAGCTCAACTCTGACTGTTTGTGATCCGAGGCCAACCCTA  
 CTGATGCTCTTTCCAGACTCTTCAAGGAATGGAATATTTCTCGTTTGTCTTACGAGTACG  
 ACTCTGAGCCCTTTGGGAAAGAACGAGATGCAGCGATTAAGAACTGGCTGTGAGGCTG  
 GAGTGGAGGTGACCGTTGCGATCTCCACACACTCTATGACCTGGACAAGATCATAGAGT  
 TAAATGGGGGCCAGTCACTCTGACCTACAAGCGTTCCAGACCCTCATCAGCCGGATGG  
 ATGCGGTGGAGGAGCCTGCAGACTCCATCAGCGGACATCATGGGGAAGTGACGAGACGC  
 CGCTGTCCGAGACCATGATGACAAGTTTGGCGTCCCTCATTTGGAGGAGCTGGGTTTTG  
 ATACTGAAGGTCTTTCTCCGCTGTGTGGCCGGGGGAGAGACGGAAGCCCTCACACGAC  
 TTGAGAGGCATCTGGAGAGGAAGGCGTGGGTGGCCAACCTCGAGCGTCCCAAGATGAACG  
 CCAACTCGCTGCTCGCCAGCCGACCGGCTCAGCCCATACCTGCGCTTTGGCTGCCTCT  
 CTGCGCGCTCTTCTACTTCAAACCTACCGACCTCTACAAGAAGGTGAAGAAGAACAGCT  
 CCCCTCTCTCTCGTGTATGGTCAGTGTCTGGCGGAGTCTTCTACACGGCAGCCA  
 CCAACAACCTTGCCTCGACACGATGGAGAGCAACCCCATCTGTGTCCAGATCCCTGGG  
 ACCGAAACCCAGAGGCGCTGGCCAAGTGGGCGGAGGGCCGACCGGCTTCCCTGGATCG  
 ACGCCATCATGACGCACTGAGACAGGAGGGCTGGATCCACCCTCGCCCGACATGCTG  
 TCGCTGCTTCTGACCCGGGAGACCTGTGGATCAGTGGGAGGAGGGCATGAAGGTGT  
 TTGAGGAGCTGCTGCTGGATGCAGACTGGAGTGTGAACGCGGCGAGTGGATGTGGCTCT  
 CCTGACGCTCTTCTTCCAGCAGTCTTCCACTGCTACTGCCCGTGGGCTTCGGCCGCC  
 GCACAGACCCCAACGGAGATTACATAAGGCGCTACCTGCCCATCTCAGAGGCTTTCCAG  
 CCAAGTACATTTATGATCCGTGGAATGCTCCAGAGAGTGTGCAGAAGGCGACCAAGTGA  
 TCATTGGAGTGCATTACCCCAACCCATGGTGAACACGAGAGTCCAGCCGGCTCAACA  
 TCGAGCGGATGAAGCAGATCTACCAGCAGCTGTCTGCTACAGAGGCTCGGCCCTCTGG  
 GTTCAGTTCCTCCACTTCTAACGGTAACGGAGAGACGTCCTCTGACGGGATGGGATTCT  
 TGTGTAGGCTACACACAACACTGCTGACGCTCCATCTGGCTATCAGATGAGCGTTCCT  
 CGCAGGGAGATTGGCAGAGCGGCTCATGACGTTTATGACGGGCGACGCAAAACAGCT  
 GCAGCTCACAGCAGCAGGTTATGCAGGCACAGTAGTAGTATGCTGTGTACACCCAAG  
 GTGCACAGCAAAATTCAAAAGGACCTGAACACACGTCACCCCTCTGTCCGGTGGGAAAA  
 GACACTGCGAGGACCTGGGAATGGCAGAGGCTCTAAAAACAGAGACAGGTACACACT  
 AAGCGAGTGTGTGCACTGAGACCAAGGACACAGCCAACACAAATGGACATTTTGTCTC  
 AGCACTTCAAGATGAGCAACACAACAAGACTGAATATTATAATGTGGACTGCACGGCAC  
 TCGCAGCTGCAGACGACTCAGAAGCACTCTGTTCTTTCTTTGGGTTAACATAGCCATG  
 ACAACGGTCTGTGTATATAATGAATTTGCTCATTTGACATACAACCTGTACATATTTG  
 AATATTGTATATGTTTCTCTCACTGTGTAGCCATAGACCCATTGATATATTTTGATAT  
 ATGAAATCATTTGGATGGATCTTTGTTTTTTTTTAATATTGATTAACCAACCTTTGT  
 AAAATGTCTATTCAAGAACAATTCAATTTGATAAATCTTGATCTATCTTAATATATTTT  
 TCTGTTCTCTATTGTACTTCTATTATACTCGAGATGTATATCAACAAGTGTTCATC  
 ATTCCTTTCTCTTCTGCTTCTGACTTTAATCCTCACCCTCTAGAGGCAATATCAGTT  
 TAACATCAAGTTGTTGCCAGATCTGCTGTTACTGAAAGAAGCCGACAGAAATACATGTT  
 TTCATATCATGGTGAGCCCTGCCTCCTGTATAAGCTTCAGTAAATGTAGTACATAAG  
 CTTCTTTGGGCACCAAGGAGCGCTATATAAATACCATGTATTAGTATTATGACATGAG  
 AGAACTGCTTACTTGCGATTGTTCTCTCAATGTGCTTCTTAATAAACTGGGTTTA  
 ATATAC

>emac\_fin\_isoseq\_HQ\_transcript/13348\_cry1b mRNA\_complete cds  
 GGATACAGAAACTTGAAGGGCTTGATGTGAGACGATTGGCAAGCGTAACAATTGATA  
 TATCATTTTACGTGTAAGTGAGTAAGGGTGTGCGGTAAACAACCGGAATGATTTGCGTG  
 TCTGTGCTGCTTTGAGCTAGTATTGTGTACATTATCCTCCCTCGTTATAAACGTCGCT  
 GCAGACTGATTTTTTTTCTTCTTCTTGAACGCACTTTAGTCAAATGTCTTCACTTGAT  
 CGTTTCTATTAATCGAGACAAGCTTGTGTTTTTCTCACGCTGCGGTTGTACCTGCT  
 GTTCCACATGCAGCCTTCTGTGAGGAGACTCAACTCAGTGGATACATTATGGAGCAAGG

TGGGACAAACCATTAACCTCAGACTCTCTGAAGCTACTGGCCGAAGCGTATTTACCCCTCG  
 GATGTAATTTTACACTTTTCGCTAAGAAAACAACGTAACAGGGGTGTCATTTGAAAAACAT  
 CCCATCTTTTCAACCCCGCCGGAATAAGAGAAGGCAGGCAACATGGTGGTCAACAC  
 CATCCACTGGTTCAGGAAGGGGCTCGGCTACACGACAACCCGTCCTAAGGGACTCTAT  
 CCGGGATGCGGACACGCTGCGCTGTGTTTACATCCTGGACCCCTGGTTCGAGGGTCCTC  
 CAATGTGGGCATCAACAGGTGGAGGTTTTGTTGCACTGCTTAGAGGACTTGGATGCAGG  
 CCTGCGAAAAATCAACTCCCGCTTGTGTTGTCATCAGAGGCCAGCCACAGATGCTTCCC  
 AAGGATTTTTAAGGAATGGCAGATTAACCGTTTATCTTATGAATATGACTCGGAGCCGTT  
 TGGCAAGGAGCGTGATGCTGCCATCCAAAACTAGCCAGTGAGGCTGGGGTAGAGGTCA  
 GGTGCGGACCGCTCACACCTTGTACAATCTGGACAAGATCATAGAACTGAATGAGGGTCA  
 ATCTCCCTCACCTACAAGCGCTTCCAGGCCCTCATCAACCGTATGGATGCTGTGGAGCT  
 GCCGGCAGAGACCATCACGTGAGAGTTATTAAAGAATGTGCCACACCCATCAGCGAAGA  
 GCATAATGAGAAGTTTGGGGTGCCCTCCCTAGAAGAGCTTGGTTTTGAAACAGAGGGCTT  
 GACCACAGCAGTGTGGCCAGGTGGAGAAACAGAAGCCCTCATGAGACTGGAGCGCCACT  
 GGAGAGGAAGGCATGGGTGGCAAACTTTGAGCGTCCGCTATGAACGCCAACTCCCTGCT  
 GGCCAGTCCCACAGACTAAGCCCTACCTGCGCTTCGGATGCTCTCTCTGCTGACTCTT  
 CTACTTCAGACTTACCGACCTGTACAAGAAGGTCAAGAAGAAGCAGCACCCGCCACTTTC  
 CTTGTACGGCCAGCTGTTGTGGCGGAGTTCTTTTATACATCTGCCACGAACAACCCCTG  
 CTTTGATAAGATGGAGGGAACCCCTGTGTGTGTCAGATCCCTGGGACCGAAACCCAGA  
 GGCCTGTGGCTAAGTGGCAGAGGGGACAGACAGGCTTCCCTGGATAGACGCCATCATGAC  
 ACAGCTGAGACAGGAAGGCTGGATCCATCATTTGGCGAGGCACGCTGTAGCTGCTTCT  
 CTCCAGGGGAGACCTCTGGGTGAGCTGGGAGGAAGGCATGAAGGTGTTTGAAGAGTTGCT  
 TATAGATGCCGACTGGAGTGGAATGCTGGCAGCTGGATGTGGCTCTCTTCAGATTTCATT  
 TTTCCAGCAGTTTTTCACTGCTACTGCCCTGTGCGATTGGACGACGACAGACCCCAA  
 TGGAGACTACATTAGGCGTTATTTGCCCATCTTGAAGGGCTTTCCAGCCAAATACATTTA  
 TGATCCCTGGAATGCCCCAGAGGACGTGCAGAAGGCTGCAAAGTGTATCGTAGGAGTCCA  
 TACCCCAAGCCCATGGTGAACCATGCTGAGGCCAGCCGATCAACATAGAGCGGATGAA  
 GCAAATTTACCAGCAGCTTTCAAGCTACAAAGGATTGGGCTGCTGGCAACCATACCTTC  
 CAATCCCCACAGTGGTGTGCGAGGAGTCAACACAGGAAGCAGTCACGGTGTAGGAGGCTT  
 CTCAACATACACAGTATCCCTCAAACAGAAAGAGTACAGACCACAGAAAAGAGGCGCCA  
 TGAAGAGGGTCCACATAGAGGCTCCAAATCGTTAAGCAGAGCAAATAGTGTGCAAAAGG  
 TTGAATACAAAGGGAGCCCAAGTCATTCTGGATCTTTGGATATCATCTTTATATGCAATT  
 GTTATCAGCTGACACAGCAGCTGTAACTAACAACCATAGATGACCATCATGATCTTC  
 AAATAAGACATGTTATTAATCTAAGGAAGGCGGAAGGCATTTAGACTATAATTGAAGAT  
 AAAGAACCCTGAAACAGCGGATGTAAATGCAAAACCATTTGATCTAAAGTATCCACAT  
 CAGCTTCTGCTACAGTATGTTAAATGTTGATCGTTATCATCAATGCCCGCCCCCCCCCA  
 TGACTGATGTAGGGCGTTGAGCGGGAATTTGGGTCATGAGGTCTTCTGTATGAACTTTGT  
 AACTTGTGTGAATGTGATCCATGCCTAAGTTATCAAGACAATGAGCTCAACTTTTAGCG  
 GCTTTGGCCTTTACTTTTTCTTTAAAAAATGTCTAAATCTGATTCCCATTCAAATGATG  
 GGAACCTATAACACAATTTGGAGTTGCTTATCTGACCTGGGTAACATACAGTGGTGTCTT  
 TCCATAAATTTGGGAAATATTAGGAAAAGAATGAATAAATATGTCTAAATGTACATTTG  
 ACAATGTACAAGCTCTGGACACTAAATGAGATGTACAGTAATGAAAATGACAACCTCTC  
 TGTGAGTTTGACAATAAATATGCCTTTTATAAATGCCAACAGACAGTTTTTAAATTTT  
 ATTATTTTTATTCCAACCTTATATATTTGGTTGTGTGGTTTTACAACAACCTTTGTAAA  
 TAATGTGTTACGAAAACAAAAATCCACTGGATATGCATTTCAATTTCTCCCATGTGATCG  
 TAAATATGTTATTTTGTATAAAGAATGAAAAGATTCTAACTGTATTGGAATGGCAATAA  
 ATGACACATTGTATATAATATTGATTCATCTTTTATTTGACTATAATTGTAAAGTTG  
 TTTAACTGACACCATCTTTCAACAAGAAATTAAGGTATTGTTGTGCTTTTAAAGTCT  
 GATAATCCTGCATAAGGTTTGTGATGAACAAGTTTGTACTATTGTCCTTTATGCAGTTA  
 GAAAAGATTGTGACGCTGCACATCTATATAATTGTGCTTCAGAGAAAAGCTTAATGG  
 GGGAAACATCTACCCTTATTTAATTAAGGAATTCCTCTAAATCCCATT

>emac\_fin\_isoseq\_HQ\_transcript/18671\_cry1b mRNA\_complete cds  
 GATACAGAACTTGAAGGGCTTGATGTGAGACGGATTTGCCAAGCGTAACAATTGATAT  
 ATCATTTTACGTGTAAGTGAGTAAGGGTGTGCGGTAACAAACCGGAATGATTTGCGTGT  
 CTGTGCTGTCTTTGAGCTAGTATTGTGTACATTATCCTCCCTCGTTATAAACGTCGCTG  
 CAGACTGATTTTTTTCTTCTTGGAACGCACTTAGTCAAATGCTTCACTTGATC  
 GTTTCTATTAATCGAGACAAGCTTGTGTTTTTCTCACGTCTGCCGTTGTACCTGCTG  
 TTCCACATGCAGCCTTCTGTGAGGAGACTCAACTCAGTGGATACATTATGGAGCAAGGT  
 GGGACAACCATTAACCTCAGACTCTCTGAAGCTACTGGCCGAAGCGTATTTACCCCTCGG  
 ATGTAATTTTACATTTTCGCTAAGAAAACAACGTAACAGGGGTGTCATTTGTTGTAATTG  
 GAAAACACATCCCATCTTTCAACCCCGCCGGAATAAGAGAAGGCAGGCAACATGG  
 TGGTCAACACCATCCACTGGTTAGGAAGGGGCTGCGGCTACACGACAACCCGCTCTAA  
 GGGACTCTATCCGGGATGCGGACACGCTGCGCTGTGTTTACATCTGGACCCCTGGTTG  
 CAGGGTCTCCAATGTGGGCATCAACAGGTGGAGGTTTTGTTGCACTGCTTAGAGGACT  
 TGGATGAGGCCCTGCGAAAAATCAACTCCCGCTTGTGTTGTCATCAGAGGCCAGCCACAG  
 ATGCTTCCCAAGGATTTTAAAGGAATGGCAGATTAACCGTTTATCTTATGAATATGACT  
 CGGAGCCGTTTGGCAAGGAGCGTGATGCTGCCATCCAAAACTAGCCAGTGAGGCTGGGG  
 TAGAGGTGATGGTGGGACCGCTCACACCTTGTACAATCTGGACAAGATCATAGAACTGA  
 ATGAGGGTCAATCTCCCTCACCTACAAGCGCTTCCAGGCCCTCATCAACCGTATGGATG  
 CTGTGGAGCTGCCGACAGACCATCACGTGAGAGTTATTAAAGAATGTGCCACACCCA

TCAGCGAAGAGCATAATGAGAAGTTTGGGGTGCCCTCCCTAGAAAGAGCTTGGTTTTGAAA  
 CAGAGAGCTTGACCACAGCAGTGTGGCCAGGTGGAGAAAAGAGCCCTCATGAGACTGG  
 AGCGCCACCTGGAGAGGAAGGCATGGGTGGCAAACCTTTGAGCGTCCGCGTATGAACGCCA  
 ACTCCCTGCTGGCCAGTCCCACAGGACTAAGCCCTACCTGCGCTTCGGATGTCTCTCT  
 GTCGACTCTTCTACTTCAGACTTACCGACCTGTACAAGAAGGTCAAGAAGAACAGCACAC  
 CGCCACTTTCTTGTACGGCCAGCTGTTGTGGCGGGAGTTCTTTATACATCTGCCACGA  
 ACAACCCCTGCTTTGATAAGATGGAGGGAAACCTGTGTGTGCCAGATCCCCTGGGACC  
 GAAACCCAGAGGCGCTGGCTAAGTGGGCAGAGGGGCAGACAGGCTTCCCCTGGATAGACG  
 CCATCATGACACAGCTGAGACAGGAAGGCTGGATCCATCATTTGGCGAGGCACGCTGTAG  
 CCTGCTTCCTCCAGGGGAGACCTCTGGGTGAGCTGGGAGGAAGGCATGAAGGTGTTTG  
 AAGAGTTGCTTATAGATGCCGACTGGAGTGTGAATGCTGGCAGCTGGATGTGGCTCTCTT  
 GCAGTTCATTTTCCAGCAGTTTTTCCACTGCTACTGCCCTGTCTGGATTTGGACGACGCA  
 CAGACCCCAATGGAGACTACATTAGGCGTTATTTGCCCATCTTGAAGGGCTTTCCAGCCA  
 AATACATTTATGATCCCTGGAATGCCAGAGGACGTGCAGAAGGCTGCAAAAGTGTATCG  
 TAGGAGTCCACTACCCCAAGCCCATGGTGAACCATGCTGAGGCCAGCCGCATCAACATAG  
 AGCGGATGAAGCAAATTTACAGCAGCTTTCAAGCTACAAAGGATTGGGCTGTCTGGCAA  
 CCATACCTTCCAATCCCACAGTGGTGTGCGAGGAGTCAACACAGGAAGCAGTCACGGTG  
 TAGGAGGCTTCTCAACATACACAGTATCCCTCAAACAGAAAGAGTACAGACCCACAGAAA  
 AGAGGCGCCATGAAGAGGGTCCACATAGAGGCTCCAATCGTTAAAGCAGAGCAAATAGT  
 GTGCAAAAGGTTGAATACAAAGGGAGCCCAAGTCATTCTGGATCTTTTGGATATCATCTT  
 TATATGCATTGTTATCAGCTGACACAGCAGCAGCTGTAACCTAACACCATAGATGACCAT  
 CATGATCTTCAAATAAGACATGTTATTAATCTAAGGAAAGGCGGAAGGCATTTAGACTAT  
 AATTGAAGATAAAGAACCCCTGAAACAGCGGGATGTAAAAATGCAAAACCATTTGATCTACA  
 GTATCCACATCAAGCTTCTGCTACAGTATGTTAAATGTTGATCGTTATCATCAATGCCCC  
 GCCCCCCCCATGACTGATGTAGGGCGTTGAGCGGGAAATTTGGGTGATGAGGTCTTCTGTA  
 TGAACCTTTGTAACCTTGTGTGAATGTGATCCATGCCTAAGTTCATCAAGACAATGAGCTC  
 AACTTTTAGCGGCTTTGGCCTTTACTTTTTCTTAAAAAAATGTCTAAATCTGATTCCCA  
 TTCAAATGATGGGAACCTATAACACAATTTGGAGTTGCTTATCTGACCTGGGTAAACATAC  
 AGTGGTGTCTTTCTTAATATTGGGAAATATTAGGAAAAGAAATGAATAAATATGTCATAA  
 ATGTACATTGACAATGTACAAGCTCTGGACACTAAATGAGATGTACAGTAATGAAAAT  
 GACAACCTCTCTGTGAGGTTTGACAATAAATAATGCCTTTTATAAATGCCAACAGACAGT  
 TTTAATAATTTATTTATTTTATTTTCCAACCTTATATATTGTTGTGTGGTTTTACAACA  
 ACTTTTGTAATAATGTGTTACGAAAACAAAATCCACTGGATATGCATTCAATTTCTC  
 CCATGTGATCGTAAATATGTTATTTTGTATAAAGAAATGAAAGATTCTAACTGTATTGG  
 AATGGCAATAAATGACACATTGTCATAT

>emac\_fin\_isoseq\_HQ\_transcript/97523\_cry2 mRNA\_partial cds  
 GAAGTGCTGGTTGGTTTGACAGCAGGTGAAGTTTCTCGGGGGTCTACAAACTGCCTGT  
 TTACATTAGACGATCTCTGGATTCTTCTTATGATGGAATAAGGAGTCATCATGGTGGTA  
 AACTCTGTGCACTGGTTTCGCAAGGCCGCGGCTGCACGATAACCCGGTGTGCAGGAG  
 GCCCTGACCGGGGCGGACACGGTGCCTGTGTATGTCCTGGACCGGTGGTTTCGCCGGC  
 GCCGCTAACGTGGGAATCAACAGATGGAGGTTTCTGCTTGAGGCTCTGGAGGACCTGGAT  
 AACAGTCTGAAGAAGCTCCACTCCAGACTGTTTGTAGTCAAGGGCAGGCCACCGATGTT  
 TTCCCAAGGCTCTTTAAGGAATGGAAGTGACCAGGTTGACATTTGAGTATGACCCAGAG  
 CTTATGGGAAGGAGAGGGACGGGCTATCATCAAGATGGCCAGGAGTTTGGAGTGGAG  
 ACTGTTGTGAGAACTCACACCCCTCTACAACCTGGACCGGATAATAGAGGCGAACAAC  
 AACAGCCCCCCTGACCTTCAAGCGCTTTCAGGCCATTGTGAGCAGACTGGAGTTGCC  
 CGGAGACCGCTGCCCCCATCACCCAGCAGAGATGGACAAATGTTGCACTAAATAGCT  
 GACAACCATGACAGCTTTACAGTATACCTTCACTGGAAGAACTAGGTTTCAGGACAGCA  
 GGTTTACCTCCAGCTGTGTGGAAGGGAGGAGAGTCAAGGCTTTGGACCGACTCAACAAA  
 CATCTGGACAAGAAGGTGTGGGTGGCCAACTTTGAGCACCCCGTGTCAACAGTGCTCA  
 CTGTATGCCAGCCCACTGGCTCAGCCCTACCTGCGCTTCGGCTGTCTGTCTGCAGG  
 GTTCTGTACTAACCTCCGAGAGCTCTACATGAAG

>emac\_fin\_Isoseq\_HQ\_transcript/25284\_cry2 mRNA\_partial cds  
 GGCTGCTCTACAGCTCCTGATTCATCCACAGTGTGTGTCTCCTGTATCCAGGGCTG  
 GAGGGGGGGGGGACAGTCACCCATCACAGACTGCCTCACACACACTGCCAGCCCCAGCT  
 TCAACACACACCCAGAGCAGTCGGTCAAGGTCCAACCCCTCCTCCCCATGTCTCTTTCC  
 CCGAGTCCAGCCAGACCATGACTCAGCACTCCTCTCAGGGCCAGAGGAAGAAAGCCCG  
 GCCTGCAAGGTGCGTCGACGCCAGAGGCAGAGGGAGCAACACTCCATCCAGGGCGGGA  
 GAGGAGGAGATTGAGGAAGGAGGGGTGGAGGAGATGATGGAGGAGGAGGACGTTGAGCAG  
 GGTGAGGAGAGAATGGAGGAGGAGACGGCAGAGCCTCAGCAGTGATGTGAGGTGGAGGTC  
 AAAGAACAATGGTCCAACATCCATCTCAGGCAACTGGACTCATAAACACCTTCAAGGAGA  
 CGTGTTCTGGATATGTGGACAACACTTCAAGCATGTGCTCAGCAGGAAGCAGAACTAAA  
 TCATTTTACTTGAGCTTACTCCATCCAGAACAAAATGGTAAACAGTCTGGATAATAATA  
 GCTCCATGAAACCAAGGGGCCCTTTTTAACATTTTATAACAGAACAGTCAAGAAGGAT  
 CCAGAAAGTGCTTAGAAATACAAAATATTATTATTATCAATTATCAATTACGGTAAA  
 TTATTTTAAAAAAAATTTTTTATTCAAGGAAATGGGGTGATAATCCTAAAAAGTTTTTC  
 AAGATGGTTGACCTTCTCTTGAAGTTCACCTCTGACACCCACACTTAATAAGACACA  
 TTGTACTGCAACTACTCACACACACTATCCAGTGAACACAGTGTGACATTCAAGCCCT  
 CTCGGTGCCTAGCTGTCTTACCTCTGGAAGCAAGACGAGGAGCCTGTCCCTGCTTTG



CTCCCCCTCCCCTCCCTCGATAGTGATTAGAGAGAGAGTAAGTAACTGTTCCAGTCTGAAAC  
 ATGTCCTTGGTGGTGGGTGAGCAGAGAGGATCACTTCATTCTGGGTCGCCCATAAAACT  
 GACCATTAGTATTATTTAGCGGCAGTAAAAATATCAAAATGTCCTTTATGTTGCAGCTC  
 CCTTCAACGATCAACTGTGGATGCTTTGAGCCTGCTTTACGAGGCACTGGATTATATTC  
 AGCGGGAAAAACAGTCTCGTCAATGTGAGACTTTATTTAATGTAAAGCCATTTAGGCTCA  
 GGAACAGAATGCTTTTCTGTGAATTGGCCCTGATTATTTACTTTGCCACATTTAAAAA  
 CACCTAAGGAGAAAAATGAAATATACATATTAAATTTGAAAGCACAATGTAAGTATTTTG  
 GAAAAAAGTCAGATATTTTGTAGGGGCAATGAAATGTTTTATAGTGACGGGGAACA  
 TTTCTATAGACTACCTCCCTTAATCTGCTGTTTTGGAGTCACATATACAGCCCGGAAA  
 AAAATGAAGAGACCACTTCAGTATTATCATTTTCTCCTATTTTATTATTATTAGGTTGT  
 CTTTGAGTTAAAAAAATGTTTTAATTTAAAAATAGTTCAATTATTTGTATTGATTTTA  
 TTGTATTCTAAAAACTCCTGACGATTTTCTCTGTGTTGGAATTAACAGACACTGGAAT  
 GGCTGCCATACATGTAGAGATAAATATTTAAGAAAAATGTGGAGTAGTTTCCGCGGCTGT  
 ATATAAAATATATGAAACATTTAAGGTCAAATTAACACCGTATGTATTACGTGTGACCT  
 TATGCTTTTGTCTCTGACAATAAAAATGCTGCATGTGTAGAATGAATGTAGAACGAAA  
 AACGACGTGTGTGCTCCCATTTATTTATAAGAGTTTGTATTGAAATTATATGTAAAT  
 CATAACCTGTGCTTCTGGTTAAAGGGATTTTACCAATTTTCTACCAGAAGCATCCACC  
 AGAGGGCAGCAGATGCACTCATTTCCGCACATGTTTGTATTTGTACATTTACAAAAGCT  
 CCAACTCATTTCTTCAATCCTGATTTGTTTCTGTGATAAATGCACTAAATGCTATCA  
 GATACTGAAACCTGCCATTTCAATGTGCTTTAGATGTCCTGTTTAGTGAACCCAGAGTC  
 CAAAACAAGATTGAGAGACCTTACAGCCAAAAACAACAAATGACTTCATTACATTTTCG  
 TTCTGATAACTGACATTTAACTGATTAAAAAAATGTTTTCTAAATGTAACCTCTTTTTG  
 TTTACGATTAACATGCTGACTGCTCCCGCATTTCAAAGAGTGACAATCTGTTTGCTT  
 ATTCTACCTCATACCTTTCTGTTTACATTTTCCACTTCTAGCTGAAAACTGAAGCG  
 TTGAATCTTGTAGGTGTGTGTGTCATGGAATTTTGTGTAAGTTAGTTGATTTGA  
 AAGCAATGATTAAGTTGGACCTAATGTTTTTATTTAACTTGATATTATTGCTTTTCG  
 ACTTAATAGAGAGATGTGAAATCGATTTACATAATACATTTGAGTTAAATTCACGTTTC  
 AGTTCTTTTCACTGTAACCTTCACTGAGAAATAAGCCACCAACCTTTGGCTGAGAGACCT  
 CAGTGTGCTGAGAGGCTTCCAGGATGTTGATGTTGAGAAAAAATCTCTCAGCACTGGC  
 AGTTCTCAGTCGATTTAAAGGACGAGTGGGAATATGACGTTTAAACGAAAAGCTCACA  
 GTTCCCACTGTTCTAAACATCAACAGCTCCCTGACCAGGGGATTTGTATACGTTCCACC  
 TGCCACCATGATGCTCTGACGCGGGGTGTGCTGACTGTGTGGATATTTATGTGTTGG  
 TTTTTTTGTACAGAAATAGTTATTTTCATTAAAATGCTGAAGGAAAGTGATTG

>emac\_TRINITY\_DN52132\_c1\_g6\_i2\_cry2 mRNA\_partial cds  
 CTTCTGTCCACGCCCTTAAGTGCTGGTTGGTTTGACAGCAGGTGAAGTTTCTCGGGGGT  
 CTACAAACTGCTGTTTACATTAACGATCTCTGGATTCTTTCTTATGATGGAATAAGG  
 AGTCATCATGGTGGTAACTCTGTGCACTGGTTTCGCAAAGGCTGCGGCTGCACGATAA  
 CCCGGTGTGTCAGGAGGCCCTGACCGGGGCGGACAGCGTGCGCTGTGTGATGTCCTGGA  
 CCCGTGGTTCCGCGGCGCCCTAACGTGGGAATCAACAGATGGAGGTTTCTGCTTGAGGC  
 TCTGGAGGACCTGGATAACAGTCTGAAGAAAGCTCCACTCCAGACTGTTTGTAGTCAGAGG  
 GCAGCCCAAGTGTGTTTCCAAGGCTCTTTAAGGAATGAAAGTGACCAGGTTGACATT  
 TGAGTATGACCCAGAGCCTTATGGGAAGGAGAGGGACGGGGCTATCATCAAGATGGCCCA  
 GGAGTTTGGAGTGGAGACTGTTGTGAGAACTCACACACCTCTACAACCTGGACCGGAT  
 AATAGAGGGAACAACAACAGCCCCCTGACCTTCAAGCGCTTTCAAGGCCATTGTGAG  
 CAGACTGGAGTTGCCCCGGAGACCGCTGCCCCCATCACCCAGCAGCAGATGGACAAATG  
 TTGACTAAATAGCTGACAACCATGACAGCTTTACAGTATACCTTCACTGGAAGAACT  
 AGGTTTTCAGGACAGCAGGTTTACCTCCAGCTGTGTGGAAGGGAGGAGTCTCAGAGGCTT  
 GGACCGACTCAACAAACATCTGGACAAGAAGGTGTGGGTGGCCAACCTTGTGACCCCCG  
 TGTCAACACAGTCTCACTGTATGCCAGCCCCACTGGCCTCAGCCCCCTACCTGCGCTTCGG  
 CTGTCTGTCTGCAAGGTTCTGTACTACAACCTCCGAGAGCTCTACATGAAGTGCCTGAA  
 GCGCTGCAGTCTCTCTCTCTGTTTGGACAGCTGTTGTGGAGGGAGTCTTCTACAC  
 AGCCGCCACCAACAACCCCACTTTGACCGCATGGAGGGAACCCCATCTGTGTGCGAGAT  
 CCCGTGGGACCAAGCCAGAGGCGCTGGCCAAGTGGGTGAGGGTGGACTGGTTTCCC  
 CTGGATCGATGCCATCATGACCCAGCTGAGACAGGAGGGCTGGATCCACCACTGGCCCG  
 GCACGCCGTGGCTGTTTCTAACCAGGGGGACCTTTGGATCAGCTGGGAGAGCGGCAT  
 GC

>emac\_TRINITY\_DN62964\_c2\_g6\_i2\_cry2 mRNA\_partial cds  
 TTCTTCCAGCAGTTCTTCCACTGCTACTGCCCCTGTGGGCTTTGGAAGGAGGACCGACCCG  
 TCCGGAGACTTCATCAGGCGTTACATCCCATCCTGAAGCACTACCCCAACCGCTACATC  
 TATGAGCCGTGGAACGCTCCGAGTCCGTCCAAAGGGCAGCCAACTGCATCGTGGGAGTG  
 GATTACCCCAACCTATGATCAACCACGAGAGGGCAGCAGGCTCAACATCGAGAGGATG  
 AAACAAGTGTACCAGCAGCTCTCCACTACAGAGGCTCAGTCTACTAGCATCAGTACCA  
 ACGATCCAAGAGGAGGAGAGCCACCAATGAGCGATGAATCCAGAGCAGCAGTGGCGCT  
 GACTCTCTCCAGAGCCCTGCTGACAGCGAGGACGCGGCTGCTCTACAGCTCCTGAT  
 TCATCCACAGTGTGTGTCTCTCTGTATCCAGGGCTGGAGGGGGGGGGCAGAGTCAC  
 CCATCACAGACTGCTTCAACACACTGCCAGCCCCAGCTTCAACACACACCCAGAGCAGT  
 CGGTCAAGGTCCAAACCTCTCCCCATGTCTCTTTCCCCAGTCCAGCCAGACCATG  
 ACTCAGCACTCTCTCAGGGCCAGAGGAAGAAAGCCCGGCTGCAAGGTGCGTGCAGC  
 CAGAGGCGAGGGGAGCAACACTCCATCCAGGGCGGGAGAGGAGGAGATTGAGGAAGGA

GGGGTGGAGGAGATGATGGAGGAGGAGGACGTTGAGCAGGGTGAGGAGAGAATGGAGGAG  
 GAGACGGCAGAGCCTCAGCAGTGATGTGAGGTGGAGGTCAAAGAACAATGGTCCAACATC  
 CATCTCAGGCAACTGGACTCATAAACACCTTCAGGGAGACGTGTTCTGGATATGTGGACA  
 ACACCTCTAAGCATGTGCTCAGCAGGAAGCAGAACAATAATCATTTTACTTGAGCTTACTC  
 CATCCAGAACAATAATGGTAAAAAGCTCTGGATAATAATAGCTCCATGAAACCAAAGGGCC  
 CCTTTTAAACATTTTATAACAGAACAGTCAAGAAGGATCCAGAAAGTGCTTAGAAATAC  
 AAAATATTATTATTATCAATTATCAATTACGGTAAATATTTAAAAAACAAATTTT  
 TATTCAAGGAAATGGGGGTGATAATCCTAAAAGTTTTCAAGATGGTTGACCTTCTCTTG  
 TAAAGTTCACCTCTGACACCCACACTTAATAAGACACATTGTAAGTCAACTACTCACAC  
 ACACATATCCAGTGAACACAGTGTGACATTACGCCCTCTCCGGTGCCTAGCTGTCTT  
 ACCTCTGGAAGCAGAGCAGGAGCCTGTCCCTGCTTTGCTCCCTCCCTCCCTCGAT  
 AGTGATTGAGAAAGAGAAGTAACTGTCCAGTCTGAAACATGTCTTGGTGGTGGGTGAG  
 CACAGAGGATCACTTCTGCTGCTCCGCATAAACTGACCATTAGTATTATTATAGCG  
 GCAGTAAATATATCAATGTCCCTTTATGTTGCAGTCCCTTCAACGATCAACTGTGGA  
 TGCTTTGAGCTGCTTACGAGGCACTGGATTATATCCAGCGGAAACAGTCTCGTCA  
 ATGTACAGACTTTATTAATGTAAAGCCATTTAGGCCTCAGGAACAGAAATGCTTTCTGTT  
 GAATTGGCCTGATTATTTACTTTGCCACATTTAAAAACACCTAAGGAGAAAATTGAAA  
 TATACATATTAATTTGAAAGCACAAATGTAAGTATTTTGAAAAAAGTCAGATATTTT  
 GCTAGGGGCAATGAAATGTTTTATAGTGACGGGAACATTTCTATAGACTACCTCCCTT  
 AATCTGTCTGTTTTGAGTCAATATACAGCCGCGAAAAAATGAAGAGACCCTTCAG  
 TATTATCATTTTCTCTATTTTATTATTATTAGGTTTGTCTTGAAGTAAAAAATGTTT  
 TAATTTTAAATAGTTCAATATTTGTATTGTATTTATTGTATTCTAAAACTCCTGAC  
 GATTTTCTCTGTGTTGGAAATCAACAGACACTGGAATGGCTGCCATACATGTAGAGATA  
 AATATTTAAGAAAAATGTGGAGTAGTTTCCGCGGCTGTATATAAATATATGAACATTT  
 AAGGTCAAATTAATA

>emac\_fin\_isoseq\_HQ\_transcript/2988\_cry3a

GGTGAGCCAACTCTGATGAAGGTAGTGACAGCAGCAGCAGAAATCAACACATTCATA  
 GAGTGCTTCTAGGCTCAGACACTTTCCTGATACGTAACACTTGAAGAAATGCGTCT  
 TTCTTTGGAAGTACATAAATATCAACTACAAGGAGCCAGCATCAGAACAAA ATGGCCCC  
 AAATTCATCCACTGGTTCAGGAAGGGCTGCGTCTCCATGACAACCCATCACTGCTGCA  
 GGCGGTCAAAGGAGCAGGCACCGTGCCTGTGTTTACTTCTGGATCCTTGGTTGACAGG  
 CTCGTCCAACGTCGGTGTCAACAGTGGAGGTTTCTCCTCAGTGTTTGGAGGATCTTGA  
 CGCCAGCCTTCGGAAGCTTAACTCTGCCTTTTGTGTCAGAGGCCAACAGCCAACGT  
 GTTCCACGGCTCTTTAAGGAGTGAAGATCTCTGCCTGACCTTTGAGTATGATACGGA  
 GCCGTTTGGGAAGGAGAGAGCGTGCCATCAAGAAGCTGGCCATGGAGGAGGGGTGGA  
 GGTGTCGTCAAGACGTCACACACCTCTACGATCTGGACAAGATCAGAGCTGAATGG  
 CGGACAGCCACCACTCACCTACAAGCGTTTCCAGACTCTGATCAGTGAATGGATCCTCC  
 TGAGATGCCCGTGGAGACGCTGTGCGACACCTGATGGGTGTTGCGTCACCCCGTCGC  
 AGAGGACCAAGGAGAAAGTACGGAGTCCCTTCCCTGGAGGAGCTAGGCTTTGACACCGA  
 GGGCTGCCACAGGCGTTTGGCCGAGGAGAGACAGAGGCTCTGACAAGGATAGAGCG  
 CCATCTGGAGAGAAAGCGTGGGTAGCTAACTTCGAGCGTCCAGAAATGAATGCCAATTC  
 GTTGCTCGCCAGCCGACTGGCCTCAGCCCATACCTGCGCTTCGGCTGCCTCTCTGTGCG  
 CCTTTTCTACTTCAAGCTACCGACCTCTACCGCAAGGTGAAAAAGAACAGCTCCCTCC  
 ACTCTCTGTACGGCCAGCTGCTGTGGCGAGAGTTCTTCTACACACAGCAACCAACAA  
 CCCACGCTTCGACAAGATGGAGGAAACCGATCTGCGTGCAGTCCCTGGGACAAAAA  
 TCCTGAAGCCTTGGCAAGTGGGCGGAGGCTAAGACAGGATTTCCCTGGATAGACGCCAT  
 CATGACTCAGCTGCGGCAGGAGGGCTGGATCCATTACCTGGCCCGCATGCTGTGGCTTG  
 CTTCTCACAGGGGAGACCTTTGGATCAGCTGGGAGGAGGGATGAAGGTGTTTGAGGA  
 GCTGCTTCTTATGACAGCTGGAGCGTGAACGAGGAGCTGGATGTGGTTGCTCTGCAG  
 TTCAATTTTCCAGCAGTTCTTCCACTGCTACTGCCCGTGGGCTTCGGCCGCGGACCGA  
 CCCCACGGGGACTTCATTAGACGATACTTACCTGTCTCCGAGGTTTCCCGCTAAGTA  
 CATCTACGACCCGTGGAACGCTCCGGAGTCCGTGCAGGCAACCGCAAGTGCATCATCGG  
 CGTCCATTACCCGAAGCCATGGTGCATCACGCAGAGGCGAGCCGGCTCAACATCGAGAG  
 GATGAAGCAGATCTACCAGCAGTGAGCCGATACAGGGGACTGAGCCTGCTGGCATCCGT  
 TCCGTCTCCAATGGGAACGGGAACGGAGGAATGATGGCTACCCCTCGGAGAGCAGCA  
 GCCAGGGTCCAACAACAATTCACATTTGCTTGGAGTGTGGGGAGTTTCGGTTTCAAC  
 GAGTAACGGCAGCGGGAACATCCTCAACTTTCAAAATGAAGAAGACATGGGGCTAGCAG  
 CAGACAACAACAGCAGCAGCATGGATACCCCTCAGTGCAAGAAGCCAGCCAGACCAT  
 CAGCAGCAGCCGACTCTACCACGAGTTCGCTGTGCTCAACACCCAGGATTTCTGCACAG  
 CAGAGGAAGCATTACAGGAAGAGGGAGCGTGAATCGGAACGAGAAGGGGCGGGGAGAA  
 AGACCCGGCGTCTGCTCCGTGCACAAGATGCAGAGGAGAGTGACAGAGACTACCTAGAG  
 CAGCTGTTGATGAGGATTACTTTGAAATCACCATCCAACAGCGGAGAGAGGGAATCCAA  
 ACATGGTCACCTGTCTCCAAACACGCGCTGACATCACTGCCTCGAACTTTATGCACCTA  
 CTCTCTGTCTTTAACGTCAGAGATTCAGGGGTGCGAACGAGAGTTGAAAATGTGACT  
 TTTGACACTTTTCTACAAGTCCATTGACCTTTGACTTCTTGAAGACAGGTGTGAAGACG  
 CAAGAGGAATGTGCAAAAGTAAACGAAACACCTCGAAACTTACACAGGAAAAATGATTCTGA  
 AAAACAAATATGTACATTATTGTCTTAAACCCGCTGCCACAGTCAGTACATACTGTGTG  
 AACTCTGAAGCAGCTATACATGTGAGGTATAGAACAATCAACTCTTTTTTTCAGAGACC  
 TTTTTGTACTTTACGCAGTTTGAATAATGCTCACCAGGATAACATATACCTCCTCGC

GTTCCCTTTCACTACAGGAATATTTCTAGTCACTAGTGTTTAACTTAATATTTGAAGAA  
ATTATATTTTACTGATATTTATTGTGCGCTTGTAATGTGTGAGAAAAAGAGGACAGTG  
ATTTTAGACCTTGATTTCACTGGGCAAAATGACACAAAAAGTAATACCGTAATTAAGTAA  
AGTTTCGATGTCAATGGGGATTAAGGCACCTGGAGGTTCAAGTTACTGAGTGAGCAGGAAAT  
CCCTCTGAATATCAACGTGACTTTTCACAGTTGATATAATTAACACAAGTATTCATTTCA  
TTTGAAACCATCAATAAACAAAGAAAAGGTTTTCAGATTGTATGTACCCGTATCAGGG  
ATTTAAAAAAAACCTCAGACCGGTTTTATTGTTGATCTGTA AAAACATGTAAATTAGT  
TAGGAGACATTAGATGTGTCACTCTGGCTGTAAAACCTGCTTTTTGGAGTGTGGCATTG  
TAGGTAAGAGAGTTCTTAATAGCTTCCCTGGTAGTCTGTGTTCCATTGTGTGAGATTAT  
CAGACACATAGATGAAACCTTCAATTAAAAATATATTTTTTTCCATTTCTATGAAAACC  
ATGACGGTCTTGAGCCTTTGTGCGTTTTAACCGAACACACCGATCGATGAAACATGATCA  
GGCTCTGTTCTGTGCTGTTACTGAGATTTCTTTTCTATCACATGTTTTATTCTGAGTTT  
CCAATGTTGCTTTTTTTCATTGTAAATTATTAATTATGTACAGATCCGCTCTATGGTTTCAC  
GATGATTTGTTATAGAATTATTAGATTTTTCACAGCTGTTATATTTCTGTGATGTTGA  
TTTGACTCAACGCTTAGAAAGTCACTTGCATTCTCACCTCTTTGTTTCCCCAGAAATCT  
TCAGGGTTTCTAAAAGAGTAAAAGAAAATTGTATAACTTTGGAGTATCTCTAAGGCATTC  
TGTGCTGAAATTGAACATTTTGTGTGCAACACGTTCAACAACCAAAAACATGTGGTG  
ATTCAATTCGCGAGAGGACGTGGATGTTACATCTGTCAAATACCATGAAGACAGGGATCAG  
TTCCTGTAAACATGGGGTTTTTTTCTAAGATTTGAGGTACAAAAGGAGGAAAAAC  
GATTTAAAAAGAGGGAACGACATTCCTCAAAAACCTGTACCTCTCTGAAGACTGCTTC  
ACAGGGAGTTATTTTATTAGTTACTTTATGTATTGCTTCTTGCTAAATTTTGACGAAT  
AGTAAATACAAAATGTCAAATACTGTTTCAGAGAGCTGTACAGCATTGGACGCTGTACA  
GCTATTGGAGCGCTGTACAGTCTATTGGAGGATTGTGCTTATTTAGTTTCTACCCAAC  
CCTCGATCATCACCTTTACTTCTGATGAGAACTAATCCAAGGAATGTATGATTGGCCACA  
CCTTTCTGTTTCTCTCACACACACACACACACACACACACACACACAAACACACACTA  
AACATTGATAACTAGTGATACACAAACAGATACATCTACTGTAATCCTGACATTA AAA  
GCAGTCTAAATGTAAACATTATTTAAAGTGATCCCTTACAATTGGTCTGATTGATTATAT  
ACATCTGTATCATGAATCTGTAAGTCTTAAAGGATTTTGGAACTATTAGTTTATTT  
TAAGTCGAACCAATCTTTTAATTTGTTTTTTCTTTGTTTTGTTCTCCTCGTTGTGAC  
ATGAGCAGCTGCCATCTATCATCTCTGTAATATGTATCTTTCTTCGATTCTCCGTGTG  
TTGTGAACACTTTTGTATGCTTGATTAAGTTCCTGACAGGAAATAAAACTGTAACAT  
ACTG

>emac\_fin\_isoseq\_HQ\_transcript/49232\_cry3a  
GACATTCATAGAGTGCTTCTAGGCTCACAGCACTTTCCCGTACATCGTAACACTTGGAAG  
AAATGCGTCTTTCTTTGGACTTGACATAAATATCAACTACAAGGAGCCAGCATCAGAACA  
AAATGGCCCCAAATTCATCCACTGGTTGAGGAAAGGCTGCGTCTCCATGACAACCCAT  
CACTGTGACAGGCGGTCAAAGGAGCAGGCACCGTGCCTGTGTTTACTTCTGGATCCTT  
GGTTTGCAGGCTCGTCCAACGTCGGTGTCAACAGGTGGAGGTTTCTCCTTCAGTGTGG  
AGGATCTTGACGCCAGCCTTCGGAAGCTTAACCTCTCGCTCTTTGTATCAGAGGCCAAC  
CAGCCAACGTGTTCCACGCGCTTTAAGGAGTGGAAGATCTCTCGCTGACCTTTGAGT  
ATGATACGGAGCGGTTTGGGAAGGAGAGAGACGCTGCCATCAAGAAGCTGGCCATGGAGG  
CAGGGGTGGAGGTCGTGCTCAAGACGTCACACACCTCTACGATCTGGACAAGATCATAG  
AGCTGAATGGCGGACAGCCACCCTCACCTACAAGCGTTTCCAGACTCTGATCAGTCGAA  
TGGATCCTCTGAGATGCCGTGGAGACGCTGTGCGACACCTGATGGGTGCTTGCCTCA  
CCCCGTGCGAGAGGACCACGGAGAAAAGTACGGAGTCCCTTCCCTGGAGGAGCTAGGCT  
TTGACACCGAGGGCTGCCACAGGCGTTTGGCCGGAGGAGAGACAGAGGCTCTGACAA  
GGATAGAGCGCCATCTGGAGAGAAAGCGTGGGTAGCTAACTTCGAGCGTCCAGAAATGA  
ATGCCAATTCGTTGCTCGCCAGCCGACTGGCTCAGCCATACCTGCGCTTCGGCTGCC  
TCTCCTGTGCGCTTTTCTACTTCAAGCTCACGACCTCTACCGCAAGGTGAAAAGAACA  
GCTCCCTCCACTCTCTGTACGGCCAGCTTCTGTGGCAGAGTCTTCTACACCACAG  
CAACCAACAACCCCGCTTCGACAAGATGGAGGGAACCCGATCTGCGTGCATCCCT  
GGGACAAAATCCTGAAGCCCTTGCCAAGTGGGTGAGGCTAAGACAGGATTTCCCTGGA  
TAGAGCCATCATGACTCAGCTGCGGCAGGAGGGCTGGATCCATCACCTGGCCCGGCATG  
CTGTGGCTTGCTTCTCACAAAGGGGAGACCTTTGGATCAGCTGGGAGGAGGGATGAAGG  
TGTTTGAGGAGCTGCTTCTTGATGCAGACTGGAGCGTGAACGCAGGCAGCTGGATGTGGT  
TGTCTGCAAGTTATTTTCCAGCAGTTCTTCACTGCTACTGCCCGTGGGCTTCGGCC  
GCCGACCGACCCCAACGGGGACTTCATTAGACGATACTTACCTGTCTCCGAGGTTTCC  
CCGCTAAGTACATCTACGACCCGTGGAACGCTCCGGAGTCCGTGCAGGCAGCCGCAAGT  
GCATCATCGGCGTCCATTACCCGAAGCCCATGGTGCATCACGCAGAGGCGAGCGGCTCA  
ACATCGAGAGGATGAAGCAGATCTACCAGCAGCTGAGCCGATACAGGGGACTGAGCCTGC  
TGGCATCCGTTCCGCTCTCAATGGGAACGGGAACGGAGGAATGATGGCTTACCCCTCG  
GAGAGCAGCAGCCAGGGTCCAACAACAATTACATTTGCTTGGAGTGTGGGGAGTT  
CGGTTTCAACGGGTAAACGGCAGCGGGAACATCTCAACTTCAAAATGAAGAAGACATGG  
GGCTAGCAGCAGACAACAACAGCAGCAGCAGCATGGATACCCCTCAGTGCCAGAAGCCA  
GCCAGACCATCAGCAGCAGCGACTCTACCACGAGTTCGCTGTGCTCAACACCCAGGAT  
TTCTGCACAGCAGAGGAAGCATTACAGGAAAGAGGGAGCGTGAATCGGAACGAGAAGGGG  
CGGGGAGAAAGACCCGGGCTCCTGCTCGTGCAACAAGATGCAGAGCAGAGTGCAGAGA  
CTACCTAGAGCAGCTGTTGATGAGGATTACTTTGAAATCACCATCCAACAGCGGAGAGA  
GGGAATCCAACATGGTCACCTGTCTTCAACACGCGCTGACATCACTGCTCGAACTT  
TATGCACCTACTCTGTCTTAAAGCTCAGAGATTCCAGGGGTGCGAACGCAGAGTTGA

AAATGTGACTTTTACACTTTTTCTACAAGTCCATTGACCTTTGACTTCTTGAAGACAGG  
TGTGAAGACGCAAGAGGAAGGTGCAAAGTAACAAAACACCTCGAAACTTACACAGG

>emac\_fin\_isoseq\_HQ\_transcript/71427\_cry5

GGTTTTATGAAACAAATCAACGTGTTGGTTACCAACGCGCAACTCTCAGTAAACCAAGC  
GGAATTCCTAAGTGTGTGAGGCACAATAACGGCATGGCTCATTCTTGATTCTACTGGTTC  
CGCAAGGGGACTCAGGCTACATGACAACCCAGCCCTGATGGCTGCTCTGAGGGACTGTAAAG  
GAGCTGTACCCCGTGTATTCTCTGGACCTTACCTATATAACAACACCCCTGTGAGTATC  
AACCGCTGGAGGTTTCTCATTGGATCCCTCAAAGACCTGGACCGCAGCCTCAGGAAACTC  
AACTCCAGGCTGTTTGTGTGAGAGGGAAGCCAGAGGAAGTGTCCCTAAGCTGTTCAAG  
AAGTGGGACGTCACAAAGTTAACCTATGAGTACGACACAGAGCCCTACAGCCTGAGCCGG  
GACAGAACAGTGACACACTGGCCAAAGAACATGAAGTGAAGTCACTACAAAATCTCA  
CACACTATTATGATATGGACAGGATAATTGAGGAAAACAACGGGAAGGCTCCCTTACT  
TATAACCGGTTTGAACCAATATTGAAGACTATAGGTTCCCTTAAGAAACCCATTCTGCT  
CCAGCCATCGAAGATATTAAGATGTGAAGACGCTTGTTCAGAAAACCATGAGAAAGAT  
TATGGGATACCTACTCTGGAGGAACCTCGGTCTGACACCACAGCTCTTGGAGAAGAGAAG  
TTCCCAGGAGGAGAACAAGAGGCTCTGAGGAGATTAGATGAACACATGGAAGAAAGGAA  
TGGGTGTGTAAGTTTGAGAAAGCCTCAGACTTCTCCGAACCTCTGAGCCCCAGCACACT  
GTCTCAGTCCGTACGTCACTTTTGGCTGCCTGTCCGCACGCACCTTTTGGTGGAGGGTG  
ACAGAGCTCTATCAGGGGAAGAAGCACTCAGAGCCTCCTGTTTCCCTGCATGGCCAGCTT  
CTGTGGAGAGAGTTTTACTACGCCGCTGGTGTGGGTATCCCTAACTTTGACAAAATGGAG  
GGCAACCTGTTTGTACCCAGGTGGATTGGGACACAAACCTGAATATCTTGCATGG  
AGAGAGGCTCGGACTGGTTTCCCTTTCATCGACGCCATCATGACTCAGCTGAGGCAGGAG  
GGCTGGATCCACCACCTGGCCAGACATGCTGTGCCTGTTTTCTACCAGGGGAGACCTG  
TGGATCAACTGGGAAGAGGGCAGAAAGGTGTTGAGTATCTTTTATTGGATGGCGATTGG  
GCCCTGAATGCTGGAACTGGCAGTGGCTCTCAGCGAGTGCCTTCTTCCATCAGTACTTC  
AGAGTTTACTCGCTGTTGCTTGGCAAGAAGACAGACAAAATGGAGATTACATCAAA  
AAGTACCTTCTCTTCTGAAAAGTTCCAGCCAGTATATCTATGAGCCTTGGAAAGCT  
CCGTGAGTGTCCAGCAGGCAGCAGGTTGCATTGTGGGTAAGAGACTACCCGCAACCTATT  
GTTAAGCATGAAATGATCAGCAAGCAAAACATCCAGAGGATGAAGTTGGCTTATGCTAAG  
AGATCCAAAGATTCTGCTGAATACCAAACGAATCACCCAGCAAAATACAAGGTGTCAAG  
CGAAAGGCTAAATCCCGTCAATTGACATGCTGCAAAAGAAAAGAAAACCTAATAATGGTAC  
ACAAACAAACGGGAAGCGATGTCTGGGCTGAAAGGTTGGGACACTTTTTTGTGTATGCAG  
ACAGTGTACTATGTCTACCTCATCTCCTTAACTAGTTACTGTTTTATATTGATTTATG  
TCAATGTTTTTGTAAAAGCGAGTGAAGGGTATACTTAAAAAAATATATTCTTGCATG  
GGGATTGAGTTAAATGTGTAAGATGAATGGTCTCGTATTGTATGAAGACGAGAGATTT  
TGAGGCATCATATTGTTGCACCTTAAAGATTGAATGTTTATTTTTTACGGTTTGTTTTT  
AATATCCAATATAAATAAATTCATACATATT

>emac\_fin\_isoseq\_HQ\_transcript/72338\_cry-dash mRNA\_complete cds

GTACACCGGAGCAGCTACACACCGGGAGGAGCTGCTCTCTCACACCGAGCACTTCTGTGC  
CTAATATACTATTAGTTACACTAGTATATAATATATAAGTATGTCTACCTCGGTACAA  
TCATATGTTTACTGAGAAACGACTTGCGTCTGCACGACAAACGAGCTTTTCCACTGGGCTC  
AAAGAAATGCAGAACACATTGTCCCTCTGTACTGCTTCGACCCAAGACATTATGTGGGGA  
CGTATAACTACAACCTGCCAAGGACCGGGCCTTTCCGCTGCGTTTCTACTGGACAGCA  
TCAGGGACCTCAGACACACGTTGCTCAACAAGGGCAGCAACCTGGTAGTGAGACGGGGTA  
AACCAGAGGAGGTCGTTGCGGACCTCATCAAGCAGCTGGGCTCCGTAGTACCGTGGCTT  
TCCATGAAGAGGTGACTTCCGAGGAACCTGAATGTGGAGAAACGAGTGAAGGATGTCTGCG  
CACGGATGAAGGTCAAAGTTACACCTGCTGGGGTCCACACTGTACCACAGAGACGATC  
TTCCATTCAACCCACATATCCAGGCTGCCTGATGTGTACACTCAGTTACGGAAGGCGGTGG  
AGACCCAGAGCCGGGTGAGACCTCTGATACCGACACCTGAGCAGCTGAAGACTCTGCCCC  
AAGGGCTGGAGGAAGGAGCCATTCCCACAGCAGAGGACCTGGAACAAACAGAGCCTGTGT  
CTGATCCCCGCTCAGCCTTCCCTGCACTGGTGGGAGAGTCAAGCTTTGGCCAGACTCA  
AACACTATTTCTGGGACACTAATGCAGTTGCAACCTACAAGGAGACTCGCAACGGCTTGA  
TCGGTGTGATTATTCCACTAAATTTGCACCTTGGCTGGCGCTGGGTTGCATCTCACCCA  
GGTACATCTATCATCAGATCCAGCAGTATGAGAAGGAGCGGACGCCAATCAGAGCACAT  
ACTGGGTCATTTTTGAACCTTTGTGGAGGGATTACTTCAAGCTTGTAGGGGTCAAGTACG  
GGAACAGACTGTTTCAGATCAAAGGACTTCAAGACAAATCTGTTCCATGGAAGAAGGACA  
TGAAGCTTTTTCGACGCATGGAAGAGGGACGCACAGGAGTGCCCTTTGTGGACGCAAAACA  
TGAGAGAGTTGGCCATGACGGGCTTCATGTCCAACAGGGGGCGGCAAAATGTTGCCAGCT  
TCCTCACAAGGACCTGTGCCTGGACTGGAGGATGGGAGCGGAGTGGTTTGAATACCTGC  
TGATTGACCATGATGTCTGCAGCACTATGGGAACCTGGCTGTACAGCGCGGGCATTGGAA  
ACGACCCAGAGAGAAACAGGAAGTTCAACATGATCAAGCAGGGCTGGACTACGACAACA  
ATGGTGACTATGTGAGGAGTGGGTGCTGAGCTGCAGGGGATCAGGGGAAGCGATGTAC  
ACACACCTGGACCTCAGCACTGCGTCGCTGTACACGCCAACGTCTCCCTCGGTGAAA  
CCTACCCAACCCCATCGTCAATGGCGCTGAATGGAGCCGACACGCTAACAAAGAAACCGA  
GTGGCGCTGGGCTTTCATCACGAGGAAAGAAAGGCCGCTCTCACTCCCAACAAACACC  
GTGACAGAGGAATAGATTTCTATTCTCAAAGCAAAACCTTTGACCTTCACAGTGA  
CCCAGGAGGAACTCCAGTGATTCTAAGTGGACTGCTGCTGGACAAAATCGGTGTTGC  
CTGATGAGGATTTTATCAAATCACAAAGCGCTTTTATGGATGTGCTTCTGTTGCACTG  
CAGTAACGATGAAGCAAACTGTGGTTTTCATGCACTCAGATGATGCTTTGATGCAAGTT

TTAATGTGGTTTTCTTTGAAGTTAGCTTTTTTATGTGTGTTACCCAATAAAATGGAAT  
ATTAAGTTGTATAAGCGGTCGTGATTTTGTATGCGATGCAAATAAAATGTTTTGAC

>emac\_fin\_isoseq\_HQ\_transcript/76532\_cry-dash mRNA\_complete cds  
GTCACACGGAGCAGCTACACACGGGAGGAGCTGCTCTCTACACCGAGCACTTCTGTGC  
CTAATATACTATTAGTTACACTAGTATATAATATATAAGTATGTCTACCTCGCGTACAA  
TCATATGTTTACTGAGAAACGACTTGCGTCTGCACGACACAGAGCTTTCCACTGGGCTC  
AAAGAAATGCAGAACACATTGTCCCTCTGACTGCTTCGACCAAGACATTATGTGGGGA  
CGTATAACTACAACCTGCCAAGGACCGGGCCTTTCCGCTGCGTTTTCTACTGGACAGCA  
TCAGGGACCTCAGACACAGTTGCTCAACAAGGGCAGCAACCTGGTAGTGAGACGGGGTA  
AACCAGAGGAGGTCGTTGCGGACCTCATCAAGCAGCTGGGCTCCGTAGTACCGTGGCTT  
TCCATGAAGAGGTGACTTCGGAGGAAGTGAATGTGGAGAAACAGTAGAAGGATGTCTGCG  
CACGGATGAAGGTCAAAGTTCACACCTGCTGGGGGTCACACTGTACCACAGAGACGATC  
TTCCATTCAACCCACATATCCAGGCTGCCGTGATGTGTACACTCAGTTCAGGAAGGCGGTGG  
AGACCCAGAGCCGGGTGAGACCTCTGATACCGACACCTGAGCAGCTGAAGACTCTGCCCC  
AAGGGCTGGAGGAAGGAGCCATTCCACAGCAGAGGACCTGGAAACAAACAGAGCCTGTGT  
CTGATCCCCGCTCAGCCTTCCCTGCGAGTGGTGGGAGAGTCAAGCTTTGGCCAGACTCA  
AACACTATTCTTGGGACACTAATGCAGTTGCAACCTACAAGGAGACTCGCAACGGCTTGA  
TCGGTGTGGATTATTCACATAAATTTGCACCTTGGCTGGCACTGGGTTGCATCTACCCA  
GGTACATCTATCATCAGATCCAGCAGTATGAGAAGGAGCGGACAGCCAATCAGAGCACAT  
ACTGGGTCATTTTTGAACCTTTTGTGGAGGGATTACTTCAAGCTTGTAGGGGTCAAGTACG  
GGAACAGACTGTTTCAGATCAAAGGACTTCAAGACAATCTGTTCCATGGAAGAAGGACA  
TGAAGCTTTTCGACGCATGGAAGAGGGACGACAGGAGTGGCTTTGTGGACGCAAAACA  
TGAGAGAGTTGGCCATGACGGGCTTCATGTCCAACAGGGGGCGGCAAAATGTTGCCAGCT  
TCTTCACAAAGGACCTGTGCCTGGACTGGAGGATGGGAGCGGAGTGGTTTGAATACCTGC  
TGATTGACCATGATGCTGCAGCAACTATGGGAACCTGGCTGTACAGCGCGGGCATTGGAA  
ACGACCCCGAGAGAGAACAGGAAGTTCAACATGATCAAGCAGGGCCTGGACTACGACAACA  
ATGGTGACTATGTGAGGCACTGGGTGCCGTGAGCTGCAGGGGATCAGGGGAAGTGTGTAC  
ACACACCTGGACCTCAGCACTGCGTGCCTGTACACGCCAACGTCTCCCTCGGTGAAA  
CCTACCCAACCCCATCGTCATGGCGCTGAATGGAGCCGACACGCTAACAGAAACCGA  
GTGGCGCTGGGCTTATCAGGAGAAAGAAAGGCCGCTCTCACACTCCCAACAACACC  
GTGACAGAGGAATAGATTTCTATTCTCCAAAGCAAAACCTTTGACCCCTCAGAGTGAA  
CCCAGGAGGAAACTCCAGTGATTCTAACTTGGACTGCTGCTGGACAAAATCGGTGTTGC  
CTGATGAGGATTTTATCAAATCACAAGCGCCTTTTATGGATGTGCTTCTGTTCGACTG  
CAGTAACGATGAAGCAAACTGTGGTTTTATGTCAGTCAAGTATGCTTTGATGCAAGTT  
TTAATGTGGTTTTCTTTTGAAGTTAGCTTTTTTATGTGTGTTACCCAATAAAATGGAAT  
ATTAAGTTG

>emac\_fin\_isoseq\_HQ\_transcript/2370\_csnk1da mRNA\_complete cds  
GAGCTACAACAGATCACTGACAGAGACATACAGGATCCTGCGGAACCTCTCAAAATCCA  
GCTTCATCCGTACTGAATTAAGCGTAGCCATCTCAAAACAGCAGGAGCATAAAGTACA  
CACTTCTACCTTTCTAACGAGTGCTTTATTAGCACGGCATGACGTTATTAGGATTTTAAA  
ACAAGAGGGGAAAGATTGTGAGAGCTGACTTACTTCCGGAGAGGACATACTACAGAAC  
AGAGGACACTGTTTCATCTTATCTGAAAGGAGGTTTCATGTTTCGGATGCTGAACAGGCTG  
GGGCTGTGAACCTGAAAGCTTATTTTGGTGAATTTGGGAGCTAGCGAGCTGCTTGTACTG  
CGAGACCATGGAGCTGAGAGTGGGGAACAGATACAGACTGGGCAGGAAGATTGGAAGTGG  
ATCATTTGGGGACATCTATCTGGGAACCTGATATCTCCGTGGGAGAGGAGTCCCATCAA  
GCTGGAATGTGTGAAGACCAACACCCCGAGCTCCACATAGAGAGCAAAATCTACAAGAT  
GATGCAAGGTGGAGTGGGCATCCGACGATAAAGTGGTGGGGGGGAGGGGGACTATAA  
TGTGATGGTGATGGAGCTGCTGGGGCCAGCCTGGAGGATCTGTTCAACTTCTGCTCCCG  
GAAGTTCAGCCTCAAGACAGTCTGCTGCTGGCTGACCAAGATGATCAGCCGATCGAATA  
CATCCACTCCAAGAACTTATCCACCGAGACGTGAAGCCGGACAACCTTCTGATGGGGCT  
GGGCAAGAAGGGCAACCTGGTCTACATCATCGACTTCGGCTGGCCAAGAAGTACCGCGA  
CGCGCGCACACACAGCACATCCCTACCGCGAGAACAGAACTGACCGGCACCGCCCG  
CTACGCTTCATCAACACTCACCTGGGCATTGAACAGTCCAGGCGGGACGACCTGGAGTC  
CCTGGGCTATGCTCTATGTACTTCAACCTGGGCTCTCTGCCCTGGCAGGGCCTCAAGGC  
TGCCACCAAGAGGCGAAGTATGAACGCATCAGTGAGAAGAAGATGTCCACGCCATCGA  
GGTCTCTGCAAAGGATACCCATCGGAGTTCGCCACCTACCTGAATTTTCTGCCGCTCGTT  
GCGCTTCGACGACAAGCCCGACTACTGTAACCTCCGCCAGCTCTTCAGGAACCTGTTCCA  
TCGACAGGGCTTCTCTACGACTACGTCTTCGACTGGAACATGCTCAAATTTGGTGCCAA  
CCGAGCCGTGGAGGATGACAGAGGGGAGCGGCGGGAGCGTGAGGAGCGTCTGAGGCACAG  
CAGGAACCCCGGGGCCCGGGGCACTTCCCTCGGCCCTCAGGCAGAGCCAGGGCAACACAGGA  
AGTCGACGCCCCCTCCCACTCAACCCCGCCTCACACACAGGTTTAGAGAAGGAGAGGAA  
GGTGAGCATGCGTCTTATCAGCGAGCGCCAGTCAACATCTCCTCTTCAGACCTGACGGG  
ACGCCAGGACAGTCCCGCATGTCTCACAGGCTCTGTCTCCCGAGTCACACCCAGCGG  
CCTCCAGTCTGACGCTCCACGGTGAAAGCTGCCAAAAACATCCACCTGTGCACCATGGAG  
GCCTCAACATGCACCGCTGCTGCAGCACACACACAAAAACACAAAAACACACATAC  
ACTTTCATGTATACACACAGGACTGTTAAATGACAGAGGGGGACTACCATCCAATGCACC  
AGAAGAGTCTGGCTGCTCTTGTTCACCTTACAGAGGAAGAGCTGCACAACAGGAGTG  
TCTGGTGTGTGCTGTATGTGAGCACCTCCCCCCTCCCTGAAGCCTTGGATCTTCTTTT  
TTTAACCTTTTTGGTTTTACTTTATTTTTTGTCTTTAGCATTAACCTTTCTTCCACC

ACTGATCAGACTTCACCAGGGTCTGTTGTCGTAGGACTTTTTGGAAGAGACA  
 CGATCCATCTTTGCATTGTAAAGGACAGTGCCTAAACTCTAATGTTTGTCTGAACGAC  
 TCCTTGAATCCCAAGTCTGTTTTGTTAGATGTTTGAAGTTTAAATGTTAAGGTAGG  
 CATTGTTTTAAAGATGGGACAAGAGGTCATTTTAATGTTCTAGTTTCAAAGGTGCTTTTT  
 CTTTTTTTTTGTCTCTCAGGTGCGTGTGTATTGATCCGAAAACACGAGCAGCACT  
 CTCTGTCCGTGTACAGGCTGTGACTGCAGTGTGCTTGGGAAATCTGTGAATGGATGA  
 CATGTTGTTTTAATCTGTGCGTAGTGATGTCTTGTGTGGTCTGTCTTAGGGTTATA  
 CAAGAACATGTGAGGGTGTATTTCTTTTAGGGTTCCTTACTCCTCAGCCCTTAAGTGC  
 TTTTTACACCACATAACATCTGCCTCCATTTTTTCAAGTCCACCTCTGGCCATTTTCTA  
 CCGAGACCTCGACAACTCTGTATTATCGGTGGACTCAGCATTTAGGAAGTTACAACCTT  
 CCTCCTTCTTTGCAAAAAAACAACCTCACAGATGCCAACAAACTGTCTTTTCCAAT  
 GGAATGACTGTTCTTACAGCGAGATAAATCCACGGCCGTCTCACCAGCGTCACATAGTG  
 GTGAATATTATTGCTTAGCTAGCACCCTAAGTACAGCGGTATCTGATTGGTTGCGCAACAA  
 CATTCTCTCTTTTAAAGCTGCCTTCATATGATGCGCATGCTTCTATGGTTAGCGGCCCT  
 GCTAGTACTGTAAGTGGTATTGATTAGTTGCGCTTCGAAAGGTGAGCAGCGAGTTGG  
 TCAGAAATAGCATTTATCTCTTAAAGTTGCCTTCACATTATGCGCAATTTAAACCTCACT  
 TACTGAAGTTAGGATGTAGCATTCAGCGAAAACAGTAGTATGTTTGTAGTATGGT  
 AACTTTTTCTGCTAGCTAGCACCCTAAGTACAGCGGTATCTGATTGGTTGCGCAACAA  
 TCAAGCTAAACAACATGTTAAGAATTTGAAGTTTGGGCACAGCAAAACATCACTTCTGCG  
 AGTTTAGTTGGAATAGCATTTCTCTCGCTGTAGCCGCTTCACATTATCAGAGTTTT  
 TGTTTCTATAGTTAGTCCCTGTAGCTTGCGCCCTACATGCAGCTGGTATGTGATTG  
 CTCTGCGAGTTTGGTCGATATCAAAGCATTTCTTCTCGCGTAAAGGTGCCCTCTCTGTT  
 ACGCGATTAAAGGGTAAAGCCTTGCAGGAAAACAGTAGCTAGCTTCTACGGTAACCTCCC  
 CTGCTGGCTTGACCCGCTATTAAGAGCTGGTTGAAAGGTAAATCGACAATCGAGATCGAAA  
 GAAATGTCAACTCTGCAATTTCAAGCAGTGGGCGAAGCCAGGACCGCTCTCTCATAGA  
 AACAGCAGAATGTCAACACAGCTGTTTTTGTAGTTGTGAAGGCAGCTTCATCCAAATAA  
 TTCTGTTAGGACTTCCTACGTGATTGTACAGTACACCACTGGCGTAAAGTATACCCCC  
 GCAGCCCCCGGAGGCGGGGGGGCCCCGGCCCCCTCATATGAGAACGGGCCCCCTACCT  
 CTATACCCCAAGCGGCGCGACAGCATGTTAGGTTTCTACTAGAGCGGCGGCGCGG  
 CCGCAATTTTGAAGACACTACATGAAATAATACTGCGCCAGTGGATACATGAACAACCT  
 ACTTTTATTTTGAACATTATTTTGTAGTAGGCTAGTAGTAAGGAGGCCGTGGCAGGTGGC  
 GGTGGGGGGCCCCAGTCTAAGTACCTGCAGGGGGGGCCCCAAGTGCTTGTGTTACGCCAGT  
 GCAGTACACAACAGAAGTGAAGCCATGCAGCTCACACGATTCATTTTGTACATGAACAA  
 AATAAAAGGCACTCGTTTGATCAGTAAATGTGAGAGTCCAGGTAGAAAATGGACCGCC  
 ATGCTTTTACGAGGCTTTACGGACGTAAAGAGGTGATGGAGAGCTGTCTTAAAGAAAGCGT  
 GTACGAGCCATGTGGGACTTTTTCGGTCACTGTGAATGACCAATGAATCCTGCAGACTT  
 TAAAGTAGAAGAATCCTTGATGTGATAGACTGGTTGTAGGCTGTAACTGTGGGAGGGTGG  
 GATGGGGGGTGTACATGCTTGTCTGTTGTGTGTATAAGGTGTTACTGTCTGCCACG  
 TCCGGATGATGGAGGCGGAATACGGAGGGATTGGAAAATGCCTATTACACACCTCACAT  
 GGGGGCTTGAAAAACAATCTCAGAAAGTGCCCAATGAGCTTGTCTACTGACGCTGGCGA  
 TGATAGATACAGGGACACTTAATAAGGGATAATAGTTTTTCCATGTCTGCTTCTCACTT  
 CTTTTCTAGTTTGTCACTCCGGTCCAGTTTTGCTTTGAACTGCGCAGCGGATTATCT  
 CTACTGTGGATTCAAGGGAAATCTTTCTTCACTCCACCTTAAGACTTATGCTCCTC  
 ATTTGTAATGCCACTGTATTGTGATTTTAAAGTGTAATAAATAAGTACTTGC

>emac\_fin\_isoseq\_HQ\_transcript/50994\_csnk1da mRNA\_complete cds  
 ATCCGGAGAGGACATACTACAGAACAGAGGACACTGTTTCATCTTATCTGAAAGGAGGTTT  
 CATGTTTCGGATGCTGAACAGGCTGGGGCTGTGAACCTGAACGTATTTTGGTGAAATTT  
 GGGAGCTAGCGAGCTGCTTGTAGCCGAGACCATGGAGCTGAGAGTGGGGAACAGATACA  
 GACTGGGCAAGGAAGATTGGAAGTGGATCATTTGGGACATCTATCTGGGAACATGATATCT  
 CCGTGGGAGAGGAGGTGCGCATCAAGCTGGAATGTGTGAAGACCAACACCCCCAGCTCC  
 ACATAGAGAGCAAAATCTACAAGATGATGCAGGGTGGAGTGGGCATCCCGACGATAAAGT  
 GGTGCGGGGCGGAGGGGACTATAATGTGATGGTGTGAGCTGCTGGGGCCAGCCTGG  
 AGGATCTGTTCACTTCTGCTCCCGGAAGTTCAGCCTCAAGACAGTCTGCTGCTGGCTG  
 ACCAGATGATCAGCCGCATCGAATACATCCACTCCAAGAACTTCATCCACCGAGACGTGA  
 AGCCGGAACAATCTCTGATGGGGCTGGGCAAGAAGGGCAACCTGGTCTACATCATCGACT  
 TCGGCTTGGCCAAGAAGTACCGGACGCGCGCACACACAGCACATCCCCACCAGCAGGA  
 ACAAGAACCTGACCGGCACCGCCGCTACGCTCCATCAACACTCACCTGGGCATTGAAC  
 AGTCCAGGCGGGACGACCTGGAGTCCCTGGGCTATGTCCTCATGTACTTCAACCTGGGCT  
 CTCTGCCCTGGCAGGGCTCAAGGCTGCCACCAAGAGGCAAGTACGAACGCATCAGTG  
 AGAAGAAGATGTCCACGCCATCGAGGTCCTGTGCAAGGATACCCATCGGAGTTCTGCCA  
 CCTACCTGAATTTCTGCCGCTCGTTGCGCTTCGACGACAAGCCCGACTACTCGTACCTCC  
 GCCAGCTCTTCAGGAACCTGTTCCATCGACAGGGCTTCTCTACGACTACGTCTTCGACT  
 GGAACATGCTCAAAATTTGGTGCCAACCGAGCCGTGGAGGATGCAGAGAGGGAGCGGCGGG  
 AGCGTGAGGAGCGTCTGAGGCACAGCAGGAACCCGGGGCCGGGGCATTCCCTCGGCCT  
 CAGGCAGAGCCAGGGCAACACAGGAAGTGCAGCCCCCTCCCACTCAACCCCGCTCAC  
 ACACAGGTTTAGAGAAGGAGAGGAAGGTGAGCATGCGTCTTATCGCGGAGCGCCAGTCA  
 ACATCTCCTCTTACAGCTTACGAGGACGCGCAGGACAGTCCCGCATGTCTTACAGGCTC  
 GTCTCTCCGAGTCAACCCAGCGGCTCCAGTCTGAGCTCCACGGTGAAAGCTGCCAA  
 AAACATCCACCTGTGCACCATGGAGGCTCAACATGCACCGCTGCCTGCAGCACACACA  
 CACAAACACACAACACACATACACTTTCATGTATACACAGGACTGTTAAATGACA

GAGGGGGACTACCATCCAATGCACCAGAAGAGTCTGGCTGCTCTCTTGTTCACTTTACAG  
 AGGAAGAGCTGCACAACCAGGAGTGTCTGGTGTGTCTGTATGTGAGCAGCTCCCCCCC  
 TCCCTGAAGCCTTGGATCTCTTTTTTTAACTTTTTGGTTTTACTTTATTTTTGTTT  
 TTTAGCATTAAAACTTTCTTCCACCAGTATCAGACTTCACCAGGCTGTGTGTCGTAG  
 GACTTTTTGGAAAAGTGAAGAGACACGATCCATCTTGCATTGTTAAAGGACAGTGCCT  
 AAACCTTAATGTTTGTCTGAACGACTCCTTGAATCCACAAGTCTGTTTTGTTTAGAT  
 GTTTGAGGTTTAAATGTTAAGGTAGGCATTGTTTTAAAAATGGGACAAGAGGTCATTTTA  
 ATGTTCTAGTTTCAAAGGTGCTTTTTTTTTTTTTTGCTCCTCAGGTGCGTGTGTA  
 TTTGATCCGAAAAACACGACGACACTCTGTCCGTGTACAGGCTGTGACTGCAGTGTGC  
 TGCTTGGGAAATCTGTGAATGGATGACATGTTGTTTTAATCTGTGCGTAGTGATGTGCT  
 TTGTGTGGTTCTGTCTTAGGTTATACAAGAATGTCAGGGTGTATTTCTTTTAGGGT  
 TCCTTACTCCTCAGCCCCCTAACTGCTTTTACACCACATAACATCTGCCTCCATTTTTT  
 TCAAGTCCACCTCTGGCCATTTCTACCGAGACCTCGACAAACTCTGTATTATCGGTGGA  
 CTCAGCATTTACGGAAGTTACAACCTTCTCCTCTTTGC

>emac\_fin\_isoseq\_HQ\_transcript/99369\_csnk1db mRNA\_complete cds  
 ACAACGAGATGGAGCTGAGAGTAGGGAACCGATACAGACTGGGCAGGAAAATCGGAAGTG  
 GATCTTTTCGGGGACATCTATTTAGGCACAGATATTTCCGTGGGTGAAGAGGTGGCCATTA  
 AGTTGGAATGCGTGAAGACCAACACCCCCAGCTCCACATTGAGAGCAAGATCTACAAGA  
 TGATGCAAGGAGGAGTGGGCATTCCAACCATCAAGTGGTGTGAGCAGAAGGCGACTACA  
 ACGTGATGGTGATGGAGCTGCTGGGGCCAGTCTGGAGGATCTCTTCAACTTCTGCTCTC  
 GCAAGTTACGCTGAAGACGGTCTGCTGCTCGTGATCAGATGATCAGTCGATTTAGT  
 ACATTCACCTCCAAGAACTTCATCCACAGAGATGTGAAGCCCGATAACTTCTGATGGGTC  
 TGGGCAAAAAGGGCAACCTGGTCTACATCATCGACTTTGGCTGGCTAAAAAGTACCGCG  
 ACGCCAGAACAACACGACATCCCCTACCGAGAGAACAAGAACCTGACTGGCACC GCCC  
 GCTACGCCCTCAACACACATCTGGGGATCGAACAGTCGAGACGTGACGACCTGGAGT  
 CTTTGGGCTATGTTCTCATGTATTTTAACTCGGCTCTTTGCCCTGGCAAGGCCCTCAAGG  
 CTGCTACCAAGAGGCAGAAGTACGAGCGGATCAGTGAGAAGAAAATGTCCACCCCATTTG  
 AGGTTCTTTGCAAGGGATACCCCTCTGAGTTTGCAGCTACCTGAACCTTCTGTGCTCCC  
 TGCCTTTGACGACAAGCCGACTACTCGTACCTGCGGCAGCTCTTCAGGAACCTGTTC  
 ACAGACAGGGCTTCTCTTACGACTATGTGTCGACTGGAACATGCTCAAGTTTGGAGCTA  
 ACCGTGCAAGCTGAGGAAGCAGAGAGGGAGAGGCGGACCGGGAGGACAGGCTGAGGCACG  
 GCAGGAACCCAGGGGCCAGAGGAGTCCCTGCTGCATCAGGACGGCCCGAGCAGCCCAAG  
 AGGGAGCCCCACCCACCCCGTTAACACCCACCTCACACACAGCCAACACGTCCTCTCGAC  
 AAGTATCCGGTATGGAGCGTGAGCGAAAGGTCAGCATGCGACTGCACCGCGGCGCCCTG  
 TCAACGTGTCTCTCAGACCTGACAGGACGGCAGGAGAGCTCCCGCATGTCCACCTCAC  
 AGATGATGTCGGTGTACCGAACGCTGGTCTCCATCTTCTAGCTCCTCGATGAGCCCTCC  
 CCACAATGCACCCTGGCGGACAGGCCCTTTCCACTAAGAAGCAATCTTAACATCTTAC  
 TAACTACTATTCTTAACACAGCCGCTGCGGCTCACTGCTCCCTGACTGCTCTCAGTA  
 CAGCTCTCATTAGACTCTGGTCTCTCCAGGACTAAACAGTGGCCGACCTCGGGACC  
 ACTCTTTGTTTTTCAGGAGAGCTAAAAACAAAACACCACGAGCAGAGTCTGAATGGGCAGC  
 GCTTTGTCTGAGGCAACATGGCAGCCGACTCACTGAAGTGAAGACTCTTCTCTGCA  
 GAAACATCTGTCTATTGAGGACCCACATTTCCACCTCTGCTACTTCAACCTGATCAAT  
 AAAACATCTCTTTTGGAGCAGTCAAAATG

>emac\_fin\_isoseq\_HQ\_transcript/5959\_csnk1db mRNA\_complete cds  
 GTTAACTGCCAAAGTACTAACGAAGCAACAGCCTTAGCTAACCAACGAGATGGAGCTGAG  
 AGTAGGGAACCGATACAGACTGGGCAGGAAAATCGGAAGTGGATCTTTTCGGGGACATCTA  
 TTTAGGCACAGATATTTCCGTGGGTGAAGAGGTGGCCATTAAGTTGGAATGCGTGAAGAC  
 CAAACACCCCAAGCTCCACATTGAGAGCAAGATCTACAAGATGATGCAAGGAGGAGTGGG  
 CATTTCAACCATCAAGTGGTGTGGAGCAGAAGGCGACTACAACGTGATGGTGTGAGGCT  
 GCTGGGGCCAGCTCTGGAGGATCTCTTCAACTTCTGCTCTCGCAAGTTACGCTTGAAGAC  
 GGTCTGCTGCTCGTGATCAGATGATCAGTCGATTTAGTACATTCACCTCAAGAACTT  
 CATCCACAGAGATGTGAAGCCGATAAATCTCTGATGGGTCTGGGCAAAAAGGGCAACCT  
 GGTCTACATCATCGACTTTGGCTGGCTAAAAAGTACCGCGACGCCAGAACAACACAGCA  
 CATCCCCACCGAGAGAACAAGAACCTGACTGGCACC GCCCGTTACGCTCCATCAACAC  
 ACATCTGGGGATCGAACAGTCGAGACGTGACGACCTGGAGTCTTTGGGCTATGTTCTCAT  
 GTATTTTAACTCGGCTCTTTGCCCTGGCAAGGCCCTCAAGGCTGCTACCAAGAGGCAGAA  
 GTACGAGCGGATCAGTGAGAAGAAAATGTCCACCCCAATTGAGGTTCTTTGCAAGGGATA  
 CCCCTCTGAGTTTGGCAGCTACCTGAACCTCTGTGCTCCCTGCGCTTTGACGACAAGCC  
 GGACTACTGTAACCTGCGGAGCTCTTCAAGAACCTGTTCCACAGACAGGGCTTCTCTTA  
 CGACTATGTGTTGACTGGAACATGCTCAAGTTTGGAGCTAACCGTGACGTGAGGAAGC  
 AGAGAGGAGAGGCGGGACCGGGAGGACAGGCTGAGGCACGGCAGGAACCCAGGGGCCAG  
 AGGAGTCCCCTGCTGCATCAGGACGGCCCCGAGCAGCCCAAGAGGGAGCCCCACCCACCC  
 GTTAACACCCACCTCACACACAGCCAACACGTCCCCTCGACAAGTATCCGGTATGGAGCG  
 TGAGCGAAAGGTGAGCATGCGACTGCACCGCGGCGCCCTGTCAACGTGTCTCTCAGA  
 CCTGACAGGACGGCAGGAGAGCTCCCGCATGTCCACCTCACAGATGATGTCCGGTGTACC  
 GAACGTGTGCTCTCCATCTTCTAGCTCCTCGATGAGCCCTCCCGCAATGCACCTGGCGG  
 ACCAGGCCCTTTCCACTAAGAAGCAATCTTAACATCTTACTAACTACTATTCTTAAC  
 CAGCCGCTGCGGCTCACTGCTCCCTGACTGCTCTCAGTACAGCTCTCATTAGACTCT  
 GGTCTCTCCAGGACTAAACAGTGGCGCACCTCGGGACCACTCTTGTTCAGGAGA

CGTAAAAACAAAACACCACGAGCAGAGTCTGAATGGGCAGCGCTTTGTCTGAGGCAAAACA  
TGGCAGCCGGACTCACTGAAGTGAAGACTCCTTCCTCTGCAGAAACATCTGTCATTGAGG  
ACCCACATTTCCACCGTCTGCTACTTCGAACCTGATCAATAGAACATCTCTTTGAGCA  
GTCAAAATGTATAAAGATAAAGCAGCAGCTTTTCATTTTCTAAATATATGTATGGGTAGTT  
TTTGGGGTGTGATGCTTTTCACTTTTCACTCCCTCCTCCCACTGACCACTTTTCTGTTT  
TTAACTAGGGCCCCACCACGTATGGGGCTCTCTTCATTAACATATAGCCGTTTGTATT  
AAATAAAAAACAAAGTACTTCTTTGCATGTTTtagAGGTGAGTCTTACGCGCAGGCGTGG  
ACTCACTGCTAGTTGAACCCCTGCACCTACCAACCATGTGCTTTGGTGTGCTGGGTGAT  
GGAGGTTGTGATTTCACACGTTAGTTGGCAAAAAAAGTTCTGTCTTTTCATCTCCAG  
GCTCTGGGGCCCACTGAGCCCGCTTCCCTTTCTAGAGTTCCATACTAAGGAAGTCACT  
TTATGTAGGGGGCAAGGACATCAGCTAGCATATTTTACCAGGTGTCCCTTCACTGTGTAC  
AGAGAAACATCTTTCTTATTGTATCATTTTCAAGCTGTGAATTACTTGAATATTGTTG  
TAAAAATGTTTGTCTGTTGATGGGTGTGGCTTGTCTGAGGAACCTGTGAGTTTGTAG  
ATGCCATAAATGTAGTAGTGCCATCAGCCCCCGCGGAGAAATGGAGGTATCACAGA  
GCCAGCTGCTGGCAGGGAGGGTGGATGTGAAGACTTGGTGCGACCTGTTTGTGTCACT  
GCTCTTCGGTGATCTGGCATGTGACAACTGCAGTACTGCTACAGGCACTATAGTTTGT  
GAAACAATTCTTTGTGAGAGGAACCTCAACTGTACAGCAGCAGTGGGGTTTTTGT  
TTCAATCTGGACACTTCTCTGCCATGCTATCAGAATGAAATGGCCTGTTTCTTCTCCT  
GCTGCTGCTCTTCTAATATCGGATTTTGACCTTGACCTCTTCGGTCAGCCGCTTTACA  
TCGAGTAAATTATGTAAAGCAACGGATCAGCGAGATTTACTTAAATCACATTTATATTTGC  
CACTGTATTGTGTACTTAACTGTAAATAAATGAATTACTTGTACATAGTTCTTCGCGCA  
TGAATAAGTTCACTGTGACAGAGGGTAGACGCATGTGGTTTATCCACAGAAAAATATAT  
ATTTATTTTGGGAAATCAGGCATCAGGCTAGATTGTGTTGGACAACACTCAGAATA  
GCAATGTGAGGTGCACTGCATTTCTTCAACACGTACACAGTAAAGCACATGGATCACAGC  
ATCAGACATCAAAACCAACACACCCAGTGACCTTGCAGCATCAACAGTAGTAAAGGCAT  
ACAGGGACGTACATTCAGCTGAGTATACAACACCGACTGACCATTCAGTTTCCAGC  
ACACTGTATCAGGCAGCAACTGAAGAAACCTCAGTAGTAGCTCAGCTGTCACTGTACAC  
ACAAAAACAAGAAGACTAACATGGCAGCAACTAGTGAACAGCTACGGTATGACATTTAGC  
TGCCCCTTGTTTAAATAGTTTACAAGCAACTTGAATGAGAGTTGCTGTCTGTTGTGA  
ACATAAAACCAAAATACATTCAGACATTGTTGATAGTAGCTTGACAATATATTTGTAAAC  
ACGACGTCCACAAAGTCTTTGGAAGCTTTAAACCGTGTTCAGTTGTTGTTCTTGAATGA  
CATGTTCTAAGTTATCTTGTGAGATAAGCGGCAACTGGTGTGTTGTATAGGCAGTTTTT  
GTATATGTAATGATGATGCAGAACGGAGAGGAAACGTAATTAGTGCTGCTGTTCAATTGA  
AACATTTAAATCGAGTTAATCACATGATAATCTGATTAAATCATGATTACAGGCGTAGGAG  
AAGGCCTTTTCCCTGCCGGGATGTAAACGTTTGAGCTGGTATTAGCGACTTTGGGTCAA  
ACCTTCTCATGTATTAATTTGCATTAAATGTTTGTGTTTAAATGTTCAATCCCGAGCGT  
AAACTTTGACTGGCCTTTTTTTCTTTCATGTATGCATTGTAATGTTACGGGACGTTT  
GTACATACATCCCGGAAACATTTAAGAGACCATTGAGCATTATCATTGTTCTTCTTTT  
ATTAACATTTTTTATTGTATTCTATAAACTACTGACAACTTTCTCTGTGTTGAAATTCA  
ACAGACACTGGACTGGCTGCTATACATGTAGAGATAAAGATT

>emac\_fin\_isoseq\_HQ\_transcript/23750\_csnk1db mRNA\_complete cds  
ACGGAGAACATAATCTACGTTTTTACATTATCGAATGCAGTCGATATTTTAGGTGTTTCG  
TTCCTCAGAAAGGTAAGGATGGTGACATTTGTATTGTTACGGAAGGAGCTGGGAT  
TCTGGGGGGCGGGGAATGTGAAATAAGGGGTTGTATATCGCTTGTGAAAGCTGTTATC  
TGCTTGGTAAGGTAACAAAGGTTAAAGCTAAACATCAAGGATACGCAACGTTAAAC  
TGCCAAAGTAAACGAAGCAACAGCCTTAGCTAACAACGAGATGGAGCTGAGAGTAGGG  
AACCAGATACAGACTGGGCAGGAAATCGGAAGTGGATCTTTCGGGGACATCTATTTAGGC  
ACAGATATTTCCGTGGGTGAAGAGGTGGCCATTAAAGTTGGAATGCGTGAAGACCAACAC  
CCCCAGCTCCACATTGAGAGCAAGATCTACAAGATGATGCAAGGAGGAGTGGGCAATCCA  
ACCATCAAGTGGTGGAGCAGAAGGCGACTACAACGTGATGGTGTGAGCTGCTGGGG  
CCAGTCTGGAGGATCTCTTCAACTTCTGCTCTCGCAAGTTACGCTGAAGACGGTCCCTG  
CTGCTCGTGATCAGATGATCAGTCGATTTGAGTACATTCACCTCAAGAAGTTCATCCAC  
AGAGATGTGAAGCCCGATAACTTCTGATGGGTCTGGGCAAAAGGGCAACCTGGTCTAC  
ATCATCGACTTTGGCCTGGCTAAAAAGTACCGCAGCGCAGAACACACCGACATCCCC  
TACCGAGAGAACAAAGACCTGACTGGCACCGCCGCTACGCCTCCATCAACACACATCTG  
GGGATCGAACAGCTGAGACGTGACGACCTGGAGTCTTTGGGCTATGTTCTCATGTATTTT  
AACCTCGGCTCTTTGCCCTGGCAAGGCTCAAGGCTGCTACCAAGAGGCAGAAGTACGAG  
CGGATCAGTGAGAAGAAAATGTCCACCCCATTTGAGGTTCTTTGCAAGGGATACCCCTCT  
GAGTTTGCACCTACCTGAACCTTCTGTCGCTCCCTGCGCTTTGACGACAAGCCGACTAC  
TCGTACCTCGGGAGCTCTTCAAGAACCTGTTCCACAGACAGGGCTTCTCTTACGACTAT  
GTGTTTCGACTGGAACATGCTCAAGTTTGGAGCTAACCGTGACGTGAGGAAGCAGAGAGG  
GAGAGGCGGGACCGGAGGACAGGCTGAGGCACGGCAGGAACCCAGGGGCAGAGGAGTC  
CCTGCTGCATCAGGACGGGCGGAGCAGCCCAAGAGGGAGGCCCAACCCACCCGTTAAACA  
CCACCTCACACACAGCAACAGTCCCTCGACAAGTATCCGGTATGGAGCGTGAGCGA  
AAGGTGAGCATGCGACTGCACCGCGGCGCCCTGTCAACGTGTCCTCTCAGACCTGACA  
GGACGGCAGGAGACGTCCCGCATGTCCACCTCACAGATGATGTCGGTGTACCGAACGCT  
GGTCTCCATCTTCTAGCTCTTCGATGAGCCCTCCCAACATGACCTTGGCGGACAGGC  
CCTTTCCACTAAGAAGCAATCTTAACATTCTTACTAATACTATTCTAATACTACAGCCGC  
CTGCCGGCTCACTGCTCCCTGACTGCTCTCAGTACAGCTCTCATTGAGACTCTGGTCTCT  
TCCAGGACTAAACAGTGGCGCACCTCGGGACCACTCTGTTTTCAGGAGACGTAAAA



ACAAAACACCACGAGCAGAGTCTGAATGGGCAGCGCTTTGTCTGAGGCAAACATGGCAGC  
 CGGACTCACTGAAGTGAAGACTCCTTCTCTGCAGAAACATCTGTCAATTGAGGACCCAC  
 ATTTCCACCGTCTGCTACTTCGAACCTGATCAATAAACATCTCTTTTGAGCAGTCAAAT  
 GTATAAAGATAAAGCAGCAGCTTTTCATTTTCTAAATATATGATGGGTAGTTTTTGGGG  
 TGTGATGCTTTTCACTTTTCTTCCCTCCTCCCACTGACCACTTTTCTGTTTTTAATA  
 GGGCCCCCACCCTGATGGGGCTCTTTCATTAACATATAGCCGTTTGTATTAATAAA  
 AACAAAGTACTTCTTTGCAATGTTTAGAGGTGAGTCTTCAGCGGCAGGCGTGGACTCGAC  
 TGCTAGTTGAACCCCTGCACCTACCAACCATGTGCTTTGGTGTGCTGGGTGATGGAGGTT  
 GTGTATTACACAGTTAGTTGGCAAAAAAAGTTCTGTCTTTTCATCTCCAGGCTCTGG  
 GGCCCACTGAGCCCGCTTCCCTTTCTAGAGTCCATACTAAGGAAGTGCACTTTACGTA  
 GGGGGCAAGGACATCAGCTAGCATATTTTACCAGGTGTCCCTTCACTGTGTACAGAGAAA  
 CATCTTTCTTATTTGTATCATTTTCAAGCTGTGAATTACTTGTAAATATTGTTGAAAAAT  
 GTTTGCTCATCTGTTGATGGGTGTGGCTTGTCTGAGGAACCTGTGAGTTTGTAGATGCCAT  
 AAATGTAGTAGTGTCCATCAGCCCCCGCGGAGAAATGGAGGTATCACAGAGCCAGCT  
 GCTGGCAGGAGGGTGGATGTGAAAGACTTGGTGCAGCTGTTTGTGCTCACTGCTCTTC  
 GGTGATCTGGCATGTGACAACTGCAGTACTGCTACAGGCATATAGTTTTGTGAACAA  
 TTCTTTGTTGAGAGGAAACCTCAACTTGTACAGCAGCAGTGGGGTTTTTGTTCATC  
 TGGACACTTCTCTGCCATGTCTATCAGAATGAAATGGCCTGTTCACTTCTCTGCTGCTG  
 CTCCTTCTAATATCGGATTTTGACCTTGTACCTTCTCGTCAAGCGCTTTACATCGAGTG  
 AATTATGTAAGCAAACGGATCAGCGAGATTTACTTAATCACATTTATATTGCCACTGTA  
 TTTGTGACTTAACTGTAATAAATGAATTACTTGTACAT

>emac\_fin\_isoseq\_HQ\_transcript/15321\_csnk1e mRNA\_complete cds  
 GGACTATCAACAGGGAGAGCAACCGACCACAGAGCTCAGAGCTGGGGGTATGAGAGCCGC  
 CAGAATCCGCTCCCATCTCTTTACTCGGGCTTCTGTCCGACTGACAACCATCGGATCA  
 GAACCTCCACTGAACAGCTCTCGGACGAACCAATATCGGTGACAACCTCGCAACATGG  
 AGCTGAGAGTGGGGAACCAAGTACCAGGCTCGGGCGAAAGATAGGGAGTGGCTCTTTGGCG  
 ACATTTACCTTGGTGCCAACATTGCCACAGGGGAGGAGGTAGCCATCAAGCTGGAATGTG  
 TGAAGACCAACACCCACAGCTGCACATCGAGAGCAAGTTCTACAAGATGATGCAAGGAG  
 GAGTGGGCATCCGCTCGATAAAGTGGTGTGGTGCAGAGGGAGACTACAACGTGATGGTCA  
 TGGAGCTGCTCGGCCCCAGCCTGGAGGACCTTTTCAACTTCTGCTCCCGAAGTTCAAGCC  
 TGAAGACCGCTCTGCTTCTGCTGATCAGATGATCAGTCGCATCGAGTACATCCATCCA  
 AGAAGTTCATCCACCGGATGTAAAGCTGATAACTTCTGATGGGGCTCGGCAAGAAGG  
 GTAACCTGGTGTACATCATGCACTTCGGCTTGGCCAAGAAGTACCGGACGCCGCCATC  
 ACCAGCACATCCCTACAGGAGAAACAAGAACCTGACGGGCACGGCGCGCTACGCCCTTA  
 TCAACACGCACTGGGAATCGAGCAGTCCAGACGTGACGACCTGGAGTCTCTGGGTACG  
 TCCTCATGTACTTCAACCTGGGTTCCCTCCCTGGCAGGGCCTCAAGGCCGCCACCAAGA  
 GACAGAAGTACGAGCGAATCAGTGAGAAGAAATGTCCACGCCCATCGAGGTTCTCTGCA  
 AAGGATACCCCTCTGAGTTCTCCACATACCTGAACCTTCTGCCGCTCGCTCCGTTTTGACG  
 ACAAGCCCGACTACTCTTACCTACGACAGCTCTTCAGGAACCTTTCACCGCCAGGGCT  
 TCTCCTACGACTACGTCTTTGACTGGAAATGCTCAAATTTGGTGCCAGCGGAACAGCTG  
 AGGACGGAGAACGGGAGAGGAGGACGGGAGATGAGAGAGATGAGAGGGTCGACGGGTCC  
 CCAGAGGCTCGGCATCACGGGGCTCCACCGGGTCCCCCCCCGCACTGCCAACAGAG  
 TGAGGAACGGGCGGAGCAGGCCATCTCTAACCCCGCTCACGGGTGCAGCAGTCCGGGA  
 ACACGTGCGCTCGTGCCATTTCTCGCGCAGAGAGGGAAGGAAGGTGAGCATGCGGCTGC  
 ACCGCGGAGCGCCGCCAACGTGTCGTCTCTGACCTCACAGCCCGCCACGACGATCCA  
 GAATCTCCACGTACAGGTGAGCGTGCCATTGAGCACTTGGGGAAGTAGTATTTCTTTGG  
 CTCTGCATGCACATGAACTGACAGGGCTGCAAGGTATATTATCGCTCCCTTTATTTT  
 TTTCTTTTATTTTACCTTGTCTTATGAAAAGATGATTGCCAATGGACACATGGATCTT  
 TGGAAAATGGACAGTAATTTTAAAGATCCAGGGAAGTTGTGACAGTATAACAAT  
 TTGTTTCTGACGCGTGGACGCCACCACCACCACCACCACCACGATTGAGAAAG  
 CAAACACTCTGCACCATTTTACTCCATGGTTGATCATACCTGCTCCACTCCTCAAAA  
 CATTTCCCTCAGTACCTTCTGTCTGACAAATGTGAAGAGCTGTTGGCATCAAAGAAGCAA  
 AAAGTAATCGGGGACGCGCATGTTTCTCGTCAAAGGTATCCAGTGATTGATATAGGTT  
 TAGTAACGATTGCTTTTTCAGCTCGACACCGCAAAACGATTCTGTGATGTCCACATT  
 TTATCTTCTGTCAGGATATCTTAAATGGAGCTCCTGTCTTTGCTTTGTTTAGAGAGGAA  
 TAACAGCTAAGAGATTATGACATGAGGAGAGGAGGTGAGAGGTTAGTGGGACACAATGA  
 GAGGTGACTTTTAAAGAGGATCAGTAAGTGATGTTTGTGCTGCTAGAGTAATGTTTCC  
 GGTGAAGTAGCATATGGTGCTTGTGCTTCCCTTCCATCCAGTCTGTGACAACCTCGGCCACCG  
 ACACCTCCACCACCCCTTGATTTTCCAGTTTCTTTGTTTTAAATGTGAGCGGGGTAAG  
 GTGAAGAATGACCATAGATATTGCAAAGACACACTCCACGTCTTGAAGGAAGCGCTCAG  
 GAAATCTCAGCGTATTTGACCACACAGCTGCCGTTTTGGCTAACAAACAGTGGCTGCA  
 ATTTTTATGATACTTCTAAATGTTACCTTTTTTAAATATTTTTCTTATTTGAGGTCAC  
 AGGGGAGTGGGCGAGGCTCCGTTAGGATTACTCTTAAGGGTGGGGGGGGGGGTTGGACA  
 TCCAATTATGAATTTTTTTTAAATGTTTACTTCACTGTAAATATATTTTTATTTTGAT  
 GTAAAGCCAAACTGTGGTTATCTGTTTTTAAAGTAGAAATGCATACTAATGACATACCTT  
 GGGGCTGGGGGAGAAATTTAGATATTTAAAGTACTAAACCGGGGGGAGGGGCTTGTGT  
 TGCTTTGCCAGCTGGGTCAATTAATATTTTGTGTGTGTGAGACCGAGGGAATCCCTGC  
 TAAGAATTTTCACTCTGCTCTGAATGCAGACGTTATCCCACTTCTCTGCTATTTATGTT  
 AAATATTTGTACCCGTCTGCTCTTATTTGTGTGCTCTTCAACTTCTGTAACTTA  
 TTGAATAAGTGTGTGTTATGTTTTTGCCTGTCCTTTCTTTTTCTGCTTCAAA

GGTTGCTCTTATAACTTTCAATATTCCTTCCTGCAAAAAGTACATACTAATAGTTT  
TGATGTCACCTCTTGGATTTGATCCTCCAGCAACCTTAATGATGTCATTCAACAGAAAAC  
ATAACTGATGCAATCGCAGGGATGTGTAATAGCAGTGTGACTGTGTGTAATTACCTTT  
GTACAGGCCACCGTGACCCAGTGGCATCGTAACCTGTGGGGTTGGGAATGGCCTAGAAGAG  
GATGAGGCCAGGGGGTTTCACTTTATGTATTGTGACTGATATCTTGACAGTTCTTTA  
ACACACTTTATTTACAACAGTATTTGTGTATATTTATGAAGTAATAAAAATGAATAACG  
TTGCTCAC

>emac\_fin\_isoseq\_HQ\_transcript/21893\_nr1d2a mRNA\_complete cds  
ACACACAACAGGGGGAGCTCCTCGGACTCAGACGCTTGTCTCTTTACAGACTCGGAC  
CTGCAGATTATTTCCACAAATAGACTCCTGAAATGAGATTTATCTTTAAACTACTCACGC  
ACAAACAATTGTAATATCTTCTTGGGTGTTTGGGAAAGTGGCAGCAGTCTGACAGACA  
TTTTGCATTATATCTGTTTTCTTCTCGAAACGAGATGCCTGAGGACATGGGGACAG  
CCAAGCTGGAGGAGTCATAGCCTATATTTCTCCGATCTGCCTCCAGCCAGAGTCTT  
GTATGAGCACCAGCCGAGCAGAAGCTATTTGTCCACATCCAGGCCGTGTCGCCCTT  
CCCTCCCCAGCAGGGCAGTGGGCATGGTGGTGGATATCTCTCCACCCACAAAAACCAAC  
GTAGCCACGGCATGGAGAAGGCTGGGCGCTCCTCCACATCTGCCAAGAGCAACATTACCA  
AAATTAACGGCATGGTCTGTTGTGCAAGGTGTGCGGTGATGTGGCATCCGGCTTTCCT  
ATGGAGTCCATGCCTGCGAGGGCTGCAAGGGTTTCTTCAGGAGAAGCATCCAGCAAAACA  
TCCAGTACAAGAAATGTCTTAAGATGGAGAATGCACCATCATGAGAATCAACAGGAACC  
GCTGCCAGCAGTGCCGCTTCAAGAAGTGTCTGTCTGTGCGCATGTCCAGAGATGTGTCC  
GATTTGGCCGATCTCCAAAGAGGGAAAGCAAAAGGATGTCTGTGAGATGCAGAACGCCA  
TGAACAACATGATGAGCAACAACAGCCAGCTGCACAGCATGTGCACGGCCACAGAGCA  
CGTCTCCCATGGAGGCCATGACCAGCGACGCCGGCTCCTCGCCCTCTTCTCCTCTACTT  
CCGATTCCTGTCAAGTCCAAACCCCTCCTCCCGCATTGCCCCAGGACTCAGAGTCTG  
TGGTTTCAATGGACCAACTCCAGCTCCGCTCCTCCTGCGCTCAGACAGCGGCGAGG  
ACGAGGCCGTAAATGCTTTGAGCAGGCAGCACCAAGATGCCTTTGCATACAGCCAGCAGA  
AGGTGCAGAGACAGGGCCAGGCCCAACACGTCGAGCACTGTGCGCTGGAGGCGGGGT  
GTGACGGCCGGGCGGAGGAGCAGCAGCAGAAGATAGCTGGAGTGTGGAACAACAATG  
CGGTTGTGGGGGGTACCAGCAAGGATCTTACAGTAACATCCAACACGTGAGCAACACTG  
CTTACAGGGAGGAGAAGGTTTACCAGCAGCAGCCTCAGCAGCTCAACAGCACCCCTAAGT  
GTGAGCCATCAGATGACAGCGAAACAGAACATGGGTTTAAACACAAACTGCCTCAAGTG  
GTTACAATGGACCAACCAGCTGCGTGAATAATAGAGCATACTTGGTCTGTCCAATGAACA  
CATCACCTTACGTGAGCCCCACAAGCCGAGCCAGGAGATCTGGGAGGAGTTCTCCATGG  
GTTTCAACCCCGCGTGCAGGAGGTGGTGCAGTTTCCCAAGAGGATCCCGGGCTTCCGCG  
ACCTCCCGGAGCAGCAGCAGGTGCGCCTGTAAAGCTGGAACTTTTGAGGTGCTGATGG  
TCAGATTTGCCTCCCTGTTCAATGTCTGTTGAGCGGACAGTGACCTTCTGAGCGGAAAGC  
GTTACAGCCTTGACACGCTGCGGGCGCTGGGCGCTGGCGAGTTGCTTAACCTCATGTGCG  
AGTTACAGGAGAAGCTGGTGCCTGAGGCTTGACTCTGACGAAATGAGCCTCTTACAG  
CCGTGGTGTCTGCTCAGCGATCGCTCAGGGATCCAGGACCTGAACCTGGTGCAGGCCC  
TGACGAGACAACTGATCCGGGGTCTGAGGAACTTGGTGTGACAGAACACGGCGAAGAGT  
CGGCCACCACATTCACCAAGCTGCTGCTCAAACCTCCCGAGCTGCGTTCCCTCAACAACA  
TGCACTCGGAGGAACTGCTGCTTCAAAGTGACCCCGTGAAGCTTCTGAGGGGTAC  
ACCTATGCCCTCCACCTAATCCACACACCTCCACCACCCTCCACCAGGACCTGCCTCT  
TACTGCCCTCCCTCACCTCCCTGTTTCGACCAACCCAGTTGTTTGTCTAGAATGTATTGA  
AAGTTATTTTTTATTCTATTTTTGTTAAGTCGACCACGTGGGGTCTGAAGAGAGAAACAT  
ATAAAAGATGACTGTATTTATAGAAGAGATAGCTTGTGACACAAACACACGCAAGTG  
CATGTGTGTGAGGTTCTTAGTTTTGCAAACCTGGAGGCGCTTTTCTATTCTCCAGAGAAC  
CAAGAGTACTTAAGTGGCTTCTGAAAAGATATGATAAAAAACCAATTAGTCGATTCCAA  
AAGCCATTTAATTGTGTGTTCTCTGATGAGCGGGTGAATGTGAGAGACAATATGAACC  
TCACATACCGCGTGTGATTGGTCCAATATTTGACTGATACTGGCAAGGCAAGTATCA  
GAAAATGTATTGAAGAATGTGTGACGACCGCTGCTAATGCATGGCTGACCTAATGCAAAA  
CTATTATTACTTGGATCTTCTCCCTTGCTCAGAAAGCATCAGTTCAAAGTTTCAAGTGT  
ATATAGTGTCTTCTTTTATTTAATTTTTTACTTGTGTTCTGCAACTGCCTGTACACTGC  
CTGGTGATTTCTGCGGGTGTCCATGTTCTGGAGCAGAAAAACCAATAACATGTAAAGGC  
TACATGTAAACGTAGTCACACGATTTTTGCTGTTGTCCACTTTCGGGTTTTTTTTGT  
GTGTTGTTTTTAATCAAACCTTGTGTGATTGACGATAGCACTGAATTTGATGTGGTTGT  
CATATATTTTGTGAAATATCTGTTTCTCAACTGGCAACACTGCCATATGTAATATCT  
ATATAAATCAATATATATATAAATATCTGATGAACATAGAGTATAAATATGATATAGT  
ATGAATAAATACAAGTG

>emac\_fin\_isoseq\_HQ\_transcript/33623\_nr1d2b mRNA\_complete cds  
GAGACCCGCGGTTTCACTTCTGCAAGAGTAAAGCAAAAACAGCTTCCAGGACGACAAA  
CTGGCCATTTTGCTCTCGTTTCTAACTCAGATTTCTAATATCGAGTCTGTCACTGCCGCT  
GTATTTATTTCTAGTGTCTTTATTTGATTGCCTGGTTAGGTGTGGTTGATTTAAATGTTA  
TAGCGAATTTCTCCACCGGATACATCAGCGACTTCTCAGTTGCTGAACACAAACACAGA  
AAACACGGCTTCAGCACTGAGGTAGCACAGGAGGAGGAAAAACCCCGGAAATCACACAA  
AATAAAGGATATGGAGTGCAGCAAGCTGGGGCGTAATAGCCTACATCAGCTCCACCAC  
CTCCAGCCCTGAGTCTGCCACAGTGACTCCTCCAACGGCAGCTTACCCTCCTCCTC  
ACCCTCCTCTTCTTCAACCGCCGCTGCAGCTGGCAGCCCCCAGATCCTGCC  
CGGGACACCGAAGACCGGACGCTCCTCTATCTCCACCTCCACCGCAAAATGTGGCAT

CACAAAAATCAACGGCCTGGTGTGCTGTGTAAAGTCTGCGGGGACGTGGCCTCTGGGTT  
 CCACTACGGGGTTACAGCCTGCGAGGGTGCAAGGGCTTCTCCGGAGGAGCATCCAGCA  
 GAACATCCAGTACAAGAAGTGCCCTTAAGAACGAGAGCTGCCCATCATGAGGATCAACAG  
 GAACCGCTGCCAGCAGTGCCGCTTCAAGAAGTGCTGCTGGTGGGATGTCCCGGGACTC  
 GGTGCGTTTCGGCCGGATCCCAAAGCGGGAGAAGCAGCGCATGCTCCTGGAGATGCAGAG  
 CGCCATGAACAACATGATGAACAACAGCCAGCTGCAGGGCCAGTGCACGGGGGCCAGAG  
 CCAGCTGCTCGGGGGCCCCATGCTGCCTTGCCCTCTCCCGGCCACTGACGCTACCTCAGA  
 GAACGCAGGCCCTGCCCCCTCCCGCGCTCCAGCCAATCAGACGTGGGCTCTGACCCCGG  
 CGTCGCCATGGACACAGCTCGGCCTCTCCCGCTGACAGCGCGTCGTGGAGGAAGC  
 GATTGGATCCGTGACGAGGGGCCACAGGAGACCTTCATGTACAACAGGAGGCCAGCAG  
 CCTGGCCCCGAGGCCCGCCCCCGCGCCACCCCTCCTCCTCGGGAGCGGCAGGA  
 CGCCTGGAACCAACAACACCTGGTGACCATCCAGGACCCCCCTCCAGCCTGGGCAC  
 CCAGGGTCAGGAGGAGACGCCCCCCCCACCCACTGTCCCTTCAGGATGTCCAGAGGCTC  
 CGCCCCCAGCCACTGCCCCCTTACGACACAGGGGCTTCGGAGCTCAGCCCCCTGAGGG  
 CCCTGTCAACACCGCTGCAGCGCCCCCTGTGGAGAGGAGGAACAGGATGCACCTGGT  
 GTGTCCGATGAACACCTCCCTCAGTGGACCTCACAAGTCGGGCCACGAGGTTTGGGA  
 GGATTTCTCCACAGCTTACCCCTGCCGTGAGGAGGTGGTGGAGTTCGCCAAGAAGAT  
 CCGGGCTTCAGAGACCTGTGCGAGCAGGACAGGTGAGCTGCTGAAGGCCGGCACCTT  
 CGAGGTGCTGGTGGTCCGCTTGTCTCCTGTTGACGTGAAGGACCACACCGTCACCTT  
 CCTGGGGGGGAAAAAGTACAGCGTGGAGACTCTGAGGGCCATGGGGGCCGAGACCTCCT  
 GAACTCCATGTTGACTTCAGCGAGAAGCTGGTCAACCTGGGCCCTCAGCGAGGAGGAGAT  
 GAGCCTCTTACCAGCGTGGTGTGCTGCTGCGAGACCGCTCGGGCATCGAGAACGTGAA  
 CTCGGTGGAGGCGCTCGAGGAGACGCTGATCCGGACGCTGCGCAGCCTCATCACCAGGAA  
 CCACCCCAACGAGTCGGCCGTGTTACAGGCTGCTGCTGAAGTCGCCGACCTGCGCTC  
 GGTCAACAACATGCACTCCGAGGAGCTGCTGGCCTTCAAGGTCCATTCTGAACCTTCT  
 CTGATACTTGACGAAGTGTGAGCGGACACCTGCTCCTGCCTACAACCCCCACCCCCC  
 ACCCCACCTCTCAAAGCTGAAATTTGACATTCAAAGGATGGGGGGGGGGGGTGGACA  
 CTGAAATGCTGACGAGTTTAAAAAGCAGACGACAAGGAGACGTAAAGTCTTAACAAC  
 CCTGAATGTTTTAATCTGAGGGAATTAGGGACGTATCATGAGTCTTATCTGCCATGCGAG  
 TTGTCGTCCATTGCGTGTATTATTGTAATGATTGGGCATTGGGATGATTAAAGTG  
 CCACGATTGCTTGTGATTGTGCTGCTGCTCACTGAAAGAAAGGACGTATTAAAGACT  
 GTAAGGTTTTATTTCGCTCCCACTTGTGTAATAAACACGTTCTGTTTACAAAACTGTAC  
 AGACTTTAGCTGAGTAGTTGAAGTGAATAGGTGGACTATTCAGATAAAGTATGATTGT  
 AACGTCACTGAAGTGATTGTAATTTAAAGGCTGTTCTTGTTCAGAGCTTCTGTCGTGG  
 TGGTTCTGTTCTCTGTGAAAGGACAGCAGTATGTGTAGATTTCTATATGAATATAAA  
 CAACTATCAAACTACTGCATAGATGAATATATCTATATAAATACATTTTATAAATGC

>emac\_fin\_isoseq\_HQ\_transcript/42009\_nr1d2b mRNA\_complete cds  
 GAAACATAGAAAACACGGCTTCAGCACTGAGGTAGCACAGGAGGAGGAAAAACCCCCCGGA  
 AATCACACAAAAATAAGGATATGGAGTCGACCAAGCTGGGGCGTAATAGCTTACATCA  
 GCTCCACCACTCCAGCCCTGAGTCTGCGACAGTACTCTCCAACGGCAGCTTACCCT  
 CCTCCTCTCACCTCCTCTTCTTACCAGCGCTGCGAGTGGCACCCCCACCCCC  
 AGATCTGCCCCGGACACCGAAGACCGGACGCTCCTCCTCATCTCCACCTCCACCGCAA  
 AATGTGGCATCACAAAATCAACGGCCTGGTGTGCTGTGTAAGTCTGCGGGGACGTGG  
 CCTCTGGGTTCCACTACGGGTTTACGCTGCGAGGGCTGCAAGGGCTTCTTCCGGAGGA  
 GCATCCAGCAGAACATCCAGTACAAGAAGTGCTTAAGAACGAGAGCTGCCCCATCATGA  
 GGATCAACAGGAACCGTGCAGCAGTGCCGCTTCAAGAAGTGCTGCTGGTGGGATGT  
 CCGGGGACTCGGTGCGTTTCGGCCGGATCCCAAAGCGGGAGAAGCAGCGCATGCTCCTGG  
 AGATGCAGAGCGCATGAACAACATGATGAACAACAGCCAGCTGCAGGGCCAGCTGCACG  
 GGGGCCAGAGCCAGCTGCTCGGGGGCCCCATGCTGCTTGCCCTCTCCCGCCACTGACG  
 CTACCTCAGAGAACGACGGCCCTGCCCCCTCCCGCGCTCCAGCCAATCAGACGTGCGCT  
 CTGACCCCGCGCTCGCCATGACACCACTGCGCTCTCCCGCGCTGACAGCGCGTCTG  
 CGGAGGAAGCGATTGGATCCGTGACGAGGGCCACAGGAGACCTTCATGTACAACAGG  
 AGCCAGCAGCTGGGCCCCGAGGCCCGCCCCCGCCGACCCCTCACCTCGGGG  
 AGCGGCAGGACGCTGGAACCAACCAACAACCTGGTGACCATCCAGGACCCCCCTCCA  
 GCCTGGGCACCCAGGGTCAGGAGGAGACGCCCCCCCCACCCACTGTCCCTTCAGGATGT  
 CCAGAGGCTCCGCCCCAGCACTGCCCTCTACGACACAGGGGCTTCGGAGCTCAGC  
 CCCCTGAGGGCCCTGTCAACACCGCTGCGAGCGCCCCCTGTGGAGAGGAGGCAACAGGA  
 TGCACCTGGTGTGTCGATGAACACCTCCCTCAGTGGACCTCACAAGTCGGGCCACG  
 AGGTTTGGGAGGATTTCTCCACAGCTTACCCCTGCCGTGAGGAGGTGGTGGAGTTTCG  
 CCAAGAAGATCCCGGGTTTCAAGACCTGTGCGAGCATGACCAGGTGAGCTGTGAAGG  
 CCGGCACCTTCAGAGGTGCTGGTGGTCCGCTTGTCTCCCTGTTTGACGTGAAGGACCACA  
 CCGTCACCTTCTTGGGGGGGAAAAAGTACAGCGTGGAGACTTGAGGGCCATGGGGGCCG  
 GAGACCTCTGAACTCCATGTTGACTTCAGCGAGAAGTGTTCAACCTGGGCTCAGCG  
 AGGAGGAGATGAGCTTCTACCGCGTGGTGTGCTGCTGACAGCCGCTCGGGCATCG  
 AGAACGTGAACTCGGTGGAGGCGCTGACGAGACGCTGATCCGGACGCTGCGCAGCCTCA  
 TCACCAGGAACCAACCAACGAGTCGGCCGTGTTACCAAGGTGCTGCTGAAGCTGCCCG  
 ACCTGCGCTCGCTCAACAACATGCACTCCGAGGAGCTGCTGGCCTTCAAGGTCCATTCT  
 GAACCTTCTCTGATACTTGACGAAGTGTGAGCGGACCACTGCTCCTGCCTACAACCCC  
 CACCCCCCCCCACCTCTCAAAGTGAATTTGACATTCAAAGGATGGGGGGGGGG  
 GGGGGGGGCATACAAATGTTCTGTAAGTGTAGTGGGCGCCACTGCCTTGTGATGGT

GATGCATACAGACACACTGATGGACGTGTGTGTTTCTGTGTTTGTGTAGCATCCT  
 GTGTGTGGGGACAACATTAGCAGCACTTTCTGTATCGTGAAGCTGGTATTTCTGCATT  
 CATAGTGCAATATGTGACTTTTGATTTATAGCGAGGAGGAGAACTGTGTATACCTTCG  
 ACGGGAGATTTAAATGCTGTTTGATAAGCGGGAAAAAAACCTGGACACTGAAATGCTG  
 ACGAGTTTAAAAAGCAGACGACAAGGAGACGTAAAGCTGCTAAACAACCTGAATGTTT  
 TAATCTGAGGGAATTAGGGACGTATCATGAGTCTTATCTGCCATGCGAGTTGTCGTCCAT  
 TGGGTGTCATTATTTGTAATGATTTGGGCATTGGGATGATTTAAAGTGCCACGATTGCT  
 TGCTGATTTGTGCTCGTGCCTCACTGAAAGAAAGGACGTATTTAAGACTGTAAGGTTAT  
 TTCGCTCCCACTTGCTTGAATAAACACGTTCTGTTCTACAAAACCTG

>emac\_fin\_isoseq\_HQ\_transcript/29306\_nr1d2b  
 GATACATCAGCGACTTCTCAGTTGCTGAACACAAACATAGAAAAACAGGCTTCAGCACTG  
 AGGTAGCACAGGAGGAGGAAAAACCCCGGAAATCACACAAAATAAGGATATGGAGTCG  
 ACCAAAGCTGGGGGCGTAATAGCCTACATCAGCTCCACCACCTCCAGCCCTGAGTCCTGC  
 CACAGTGACTCCTCAATGGCAGCTTCCCTCCTCCTCCTCACCCTCCTCTTCTTACCC  
 AGCCGCTCGCAGCTGGACCCCCACCCCCAGATCCTGCCCGGACACCGAAGACCGGA  
 CGCTCCTCTCATCTCCACCTCCACCGCAAAATGTGGCATCACAAAATCAACGGCCTG  
 GTGCTGCTGTGTAAGTCTGCGGGGACGTGGCTCTGGGTTCCACTACGGGTTTACGCC  
 TGCGAGGGTGCAAGGGCTTCTCCGGAGGAGCATCCAGCAGAACATCCAGTACAAGAAG  
 TGCTTTAAGAACGAGAGCTGCCCCATCATGAGGATCAACAGGAACCGCTGCCAGCAGTGC  
 CGCTTCAAGAAGTGCTGCTGGTGGGGATGTCCCGGACCTCGGTGCGTTTCGGCCGGATC  
 CCGAAGCGGGAGAAGCAGCGCATGCTCCTGGAGATGCAGAGCGCATGAACAACATGATG  
 AACCAACAGCCAGCTGACAGGGCCAGCTGCACGGGGCCAGAGCCAGTGTCTCGGGGGCCCC  
 ATGCTGCTTGGCTCTCCCGGCACTGACGCTACCTCAGAGAACGACGGCCCTGCCCCC  
 TCCCCGCGCTCAGCCCAATCAGACGTTGGCTGTACCCCCGGCGTCCGCTGAGACACAGC  
 TCGGCTCTCCCGCGCTGACAGCGCTGCTCGGAGGAAGCGATTGGATCCGTGACGAGG  
 GCCCCACAGGAGACTTTCATGTACAACAGGAGCCAGCAGCCTGGCCCCGAGGCGCCG  
 CCCCCCGCGCCACCCCCCTCACCTCGGGGAGCGGACGACCTGGAACCAACACAAC  
 AACCTGGTGACCATCCAGGACCCCCCTCCAGCCTGGGCACCGAGGTGAGGAGGAGACG  
 CCCCCCCCCACCACTGTCCCTTCAAGGATGTCCAGAGGCTCCGCCCCAGCCACTGCCCC  
 TCCTACGCACACGGGCTTTCGGAGCTCAGCCCCCTGAGGGCCCTGTCAACACCGCTGC  
 AGCGGCCCCCTGTGGAGAGGAGGCAACAGGATGCACCTGGTGTGTCCGATGAACACCTCC  
 CCTCACGTGGACCTCACAAGTCGGGCCACGAGGTTGGGAGGATTTCTCCACAGCTTC  
 ACCCTTGCCGTGAGGGAGGTGGTGGAGTTCGCCAAGAAATCCCGGCTTCAAGAGCTG  
 TCGCAGCAGCAGGAGGTGAGCTGCTGAAGGCCGACCTTCGAGGTGCTGGTGGTCCGC  
 TTTGCTTCCCTGTTTGACGTGAAGGACCAACCGTCACCTTCTGGGGGGGAAAAAGTAC  
 AGCGTGAGGACTCTGAGGGCCATGGGGGCCGAGACCTCCTGAACCTCATGTTGACTTC  
 AGCGAGAAGCTGGTCAACCTGGGCTCAGCGAGGAGGAGATGAGCTCTTCAACGCCGTG  
 GTGCTGGTCTCTGCAGACCGCTCGGGCATCGAGAAGCTGAACCTGGTGGAGGCGCTGAG  
 GAGACGCTGATCCGAGCGCTGCGCAGCCTCATCACCAGGAACCAACCAACGAGTGGCC  
 GTGTTCAACAGGTGCTGCTGAAGCTGCCGACCTGCGCTCGCTCAACAACATGCACCTCC  
 GAGGAGCTGCTGGCCTTCAAGGTCCATTCTGAACCTTCTCTGATACTTGACGAACGTG  
 GAGCGGACCACTGCTCCTGCTTACAACCCCCACCCCCCAACCCCACTCTCAAGCT  
 GAAATTTGACATTCAAAGGATGGGTGGGGGGGGGGGGGGCATACAATGTTCTCGTACT  
 GTACTGTAGGGCGCCACTGCTTTGTGATGGTGTGATGCATACAGACACACTGATGGACG  
 TGTGTTTTCTGTGTTGTGTGTAGCATCCTGTGTGTGGGGACAAACATTAGCAGCACT  
 TTCTGTATCGTGAAGCTGGTATTTCTGCATTATAGTGAATATGTGACTTTTGATTTA  
 TAGCGAGGAGGAGAACTTGTGTATACCTTCAGACGGAGATTTAAATGCTGTTTGATAAG  
 CGGGAAAAAAACCTGGACACTGAAATGCTGACGAGTTTAAAAAGCAGACGACAAGGA  
 GACGTAAGCTGCTTAAACAACCTGAATGTTTAAATCTGAGGGAATTAGGACGTATCAT  
 GAGTCTTATCTGCCATGCGAGTTGTCGTCCATTGCGTGTGCTATTATTGTAATGATTTGG  
 GCATTGGGATGATTTAAAGTGCCACGATTGCTTGCTGATTGTGCTCGTGCCTCACTGAA  
 AGAAAGGACGATTTAAGACTGTAAGGTTTATTTGCTCCCACTTGCTTGAATAAACACG  
 TTCTGTTCTACAAAACCTGTACAGACTTTAGCTGAGTAGTTGAAGTGAATAGGTCGGACTA  
 TTCCAGATAAAGTATGATTGTAACGTCACTGAAGTGATTGTAATTTAAAGGCTGTTCTTG  
 TTTCCAGAGCTTCTGCTGGTGGTTCTGTTCTCTCTGTGAAAGGACAGCAGTATGTGT  
 AGATTTCTATATGAATATAAACCACTATCAACATTACTGCATAGATGAATATATCTAT  
 ATAAATACATTTTATAAATGC

>emac\_fin\_isoseq\_HQ\_transcript/19625\_nr1d2b mRNA\_complete cds  
 ACAGTCCCTCTGCACAACAGGAGCGAGCTTTTCTGCTTCAGCCTGTTTCTGTCA  
 ATGGGAAGCGGAATATCTGCATTTAAATCCTGAGAACACAGAGAGAACGACCCGCGGT  
 TTCATTTCTGCAAGAGTAAAGCAAAACAGCTTCCAGGACGACAACTGGCCATTTTG  
 CTCTCGTTTCAAACCTCAGATTTCTAATATCGAGTCTGTCACTGCCGCTGATTTATTTCT  
 AGTGTTTTATTTGATTGCTGGTTTAGGTGTGGTTGATTTAAATGTTATAGCGAATTTCT  
 CCACCGGGATACATCAGCGACTTCTCAGTTGCTGAACACAAACACAGAAAACACGGCTTC  
 AGCACTGAGGTAGCACAGGAGGAGGAAAAACCCCGGAAATCACACAAAATAAGGATAT  
 GGAGTCGACCAAGCTGGGGGCGTAATAGCCTACATCAGCTCCACCACCTCCAGCCCTGA  
 GTCCTGCCACAGTGACTCCTCAATGGCAGCTTCCCTCCTCCTCCTCACCCTCCTCTTC  
 TTCACCCAGCCGCTGACGTGGCACCCCCACCCCCAGATCCTGCCCGGACACCGAA  
 GACCGGACGCTCCTCCTCATCTCCACCTCCACCGCAAAATGTGGCATCACAAAATCAA

CGGCTGGTGTCTGTGTAAAGTCTGCGGGGACGTGGCCTCTGGGTTCCACTACGGGGT  
TACGCTCGGAGGGCTGCAAGGGCTTCTCCGGAGGAGCATCCAGCAGAACATCCAGTA  
CAAGAAGTGCCTTAAGAACGAGAGCTGCCCCATCATGAGGATCAACAGGAACCGTGCCA  
GCAGTGCCGCTTCAAGAAAGTCCCTGCTGGTGGGGATGTCCTGGGACTCGGTGCGTTTCGG  
CCGGATCCCAAAGCGGGAGAAGCAGCGCATGCTCCTGGAGATGCAGAGCGCCATGAACAA  
CATGATGAACAACAGCCAGCTGCAGGGCCAGCTGCACGGGGGCCAGAGCCAGCTGCTCGG  
GGGCCCCATGCTGCTTGGCCCTCTCCCGGCACTGACGCTACCTCAGAGAACCGAGGGCC  
TGCCCCCTCCCCGCGCTCCAGCCAATCAGACGTCGGCTCTGACCCCGGCGTCGCCATGGA  
CACCAGCTCGGCCTCTCCCGGCTGACAGCGCGTCTCGGAGGAAGCGATTGGATCCGT  
GACGAGGGCCACCAGGAGACCTTCATGTACAACCAGGAGCCAGCAGCTGGCCCCCGA  
GGCCCCGCCCCCCGCCACCCCCCTCACCCTCGGGGAGCGGACGACGCTTGAACCA  
CCACAACAACCTGGTGACCATCCAGGACCCCCCTCCAGCCTGGGACCCAGGGTCAGGA  
GGAGACGCCCCCCCCCCACCCACTGTCCTTCAGGATGTCCAGAGGCTCCGCCCCCAGCCA  
CTGCCCCCTCATCGCACACGGGGCCTTCGGAGCTCAGCCCCCTGAGGGCCCTGTCAACAC  
CGCTGCGAGCGCCCCCTGTGGAGAGGAGGCAACAGGATGCACCTGGTGTGTCGATGAA  
CACCTCCCCTCAGTGGACCTCACAAGTCGGGCCACGAGGTTTGGGAGGATTTCTCCCA  
CAGCTTCACCCCTGCGCTCAGGAGGTTGGTGGAGTTCGCCAAGAAGATCCCGGGCTTCAG  
AGACCTGTGCGCAGCAGCAGGACAGGTGAGCTGCTGAAGGCCGACCTTCGAGGTGCTGGT  
GGTCCGCTTTGCTTCCCTGTTGACGTGAAGGACCACCGTCACCTTCTGGGGGGGAA  
AAAGTACAGCGTGAGACTCTGAGGGCCATGGGGGCCGAGACCTCTGAATCCATGTT  
CGACTTCAGCGAGAAGCTGGTCAACCTGGGCTCAGCGAGGAGAGATGAGCCTTTCAC  
CGCCGTGGTGTGGTCTCTGCGAGCCGCTCGGGCATCGAGAAGTGAACCTGGTGGAGGC  
GGTGCAGGAGACGCTGATCCGGACGCTGCGCAGCCTCATCACCAGGAACACCCCCAACGA  
GTGCGCCGTGTTTACCAGGCTGCTGCTGAAGCTGCCGACCTGCGCTCGCTCAACAACAT  
GCACTCCGAGGAGCTGCTGGCCTTCAAGGTCCATTCTGAACCTTCTCTGATACCTTGAC  
GAACTGTGAGCGGACCACTGCTCCTGCCTACAACCCCCACCCCCACCCCCACCTCT  
CAAAGCTGAAATTTGACATTCAAAGGGATGGGTGGGGGGGGGGGGGGGCATACAATGTT  
CTCGTACTGTACTGTAGGGGCCACTGCCTTTGTGATGGTGTGATACAGACACACT  
GATGGACGTGTGTTTCTGTGTTGTGTGTAGCATCCTGTGTGTGGGGACAAACATTA  
GCAGCACTTCTGTATCGTGAAGCTGGTATTTCTGCATTATAGTCAATATGTGACTT  
TTGATTTATAGCGAGGAGGAGAACTTGTGTATACCTTCGACGGGAGATTTAAATGCTGT  
TTGATAAGCGGGGAAAAAACCCTGGACACTGAAATGCTGACGAGTTTAAAAAAGCAGAC  
GACAAGGAGACGTAAGCTGCTAAACAACCTGAATGTTTTAATCTGAGGGAATTAGGGA  
CGTATCATGAGTCTTATCTGCCATGCGAGTGTCTGCCATTGCGTGTCAATTATTGTAAA  
TGATTTGGGCATTGGGATGATTTAAAGTGCCACGATTGCTTGCTGATTGTGCTGTCGCG  
TCACTGAAAGAAAGGAGCTATTTAAGACTGTAAAGTTTATTTGCTCCCACTTGCTTGAA  
TAAACACGTTCTGTTTACAAAACGTGTACAGACTTTAGCTGAGTAGTTGAACTGAATAGG  
TCGGACTATTCCAGATAAAGTATGATTGTAACGTCACTGAAGTATTGTAATTTAAAGGC  
TGTTCTTGTTTCCAGAGCTTCTGCTGTTGGTGGTTCTGTTCTCCTCTGTGAAAGGACAGCA  
GTATGTGATAGTTTCTATATGAATATAAACCAACTATCAACATTACTGCATAGATGAAT  
ATATCTATATAAATACATTTTATAAATGC

>emac\_fin\_isoseq\_HQ\_transcript/29306\_csnk1db mRNA\_complete cds

GATACATCAGCGACTTCTCAGTTGCTGAACACAAACATAGAAAAACAGGCTTCAGCACTG  
AGGTAGCACAGGAGGAGGAAAAACCCCGGAAATCACACAAAATAAAGGATATGGAGTGC  
ACCAAAGCTGGGGGCGTAATAGCCTACATCAGCTCCACCACCTCCAGCCCTGAGTCTCTGC  
CACAGTGACTCTCCAATGGCAGCTTCCCCTCCTCCTCCTCACCCTCCTCTTCTTACCC  
AGCCGCTGCGAGCTGGACCCCCCACCCTCAGATCCTGCCCGGACACCGAAGACCGGA  
CGCTCCTCTCATCTCCACCTCCACGCAAAATGTGGCATCACAAAATCAACGGCCTG  
GTGCTGCTGTGTAAGTCTGCGGGGACGTGGCCTCTGGGTTCCACTACGGGGTTACGCC  
TGCGAGGGCTGCAAGGGCTTCTCCGGAGGAGCATCCAGCAGAACATCCAGTACAAGAAG  
TGCTTTAAGAACGAGAGCTGCCCCATCATGAGGATCAACAGGAACCGCTGCCAGCAGTGC  
CGCTTCAAGAAGTGCTGCTGGTGGGGATGTCCTGGGACTCGGTGCGTTTCGGCCGGATC  
CCGAAGCGGGAGAAGCAGCGCATGCTCCTGGAGATGCAGAGCGCCATGAACAACATGATG  
AACAACAGCCAGCTGCAAGGGCCAGCTGCACGGGGGCCAGAGCCAGTGTCTCGGGGGCCCC  
ATGCTGCCCTTGCCCTCTCCCGGCACTGACGCTACCTCAGAGAACGAGGCCCTGCCCCC  
TCCCCGCGCTCCAGCCAATCAGACGTGGCTCTGACCCCGGCGTCCGATGGACACCAAGC  
TCGGCCTCTCCCGCTGTGACAGCGCGTCTGCGGAGGAAGCGATTGGATCCGTGACGAGG  
GCCACACAGGAGACCTTTCATGTACAACCAGGAGCCAGCAGCCTGGCCCCGAGGCCCCG  
CCCCCGCGGCCACCCCCCTCACCTCGGGGAGCGGACGACGCTGGAACCAACCAAC  
AACCTGGTGACCATCCAGGACCCCCCTCCAGCCTGGGACCCAGGGTCAGGAGGAGACG  
CCCCCCCCACCACTGTCCCTTCAGGATGTCCAGAGGCTCCGCCCCCAGCACTGCCCC  
TCCTACGCACACGGGGCTTCGGAGCTCAGCCCCCTGAGGGCCCTGTCAACACCGCTGC  
AGCGCCCCCTGTGGAGAGGAGGCAACAGGATGCACCTGGTGTGTCGATGAACACCTCC  
CCTCACGTGGACCTCACAAGTCGGGCCACGAGGTTTGGGAGGATTTCTCCACAGCTTC  
ACCCCTGCCGTGAGGGAGGTGGTGGAGTTCGCCAAGAAGATCCCGGGCTTCAGAGACCTG  
TCGACGACGACAGGTGAGCTGCTGAAGGCCGCGACCTTCGAGGTGCTGGTGGTCCGC  
TTTGCTTCCCTGTTTACGTGAAGGACCAACCGTCACCTTCTGGGGGGGAAAAAGTAC  
AGCGTGAGGACTCTGAGGGCCATGGGGGCCGAGACCTCCTGAACTCCATGTTGACTTC  
AGCGAGAAGCTGGTCAACCTGGGCTCAGCGAGGAGGAGATGAGCTCTTACCAGCCGTG  
GTGCTGGTCTCTGCAGACCGCTCGGGCATCGAGAACGTGAACTCGGTGGAGGCGCTGCAG

GAGACGCTGATCCGGACGCTGCGCAGCCTCATCACCAGGAACCACCCCAACGAGTCGGCC  
 GTGTTACCAAGGCTGCTGCTGAAGCTGCCCCGACCTGCGCTCGCTCAACAACATGCACTCC  
 GAGGAGCTGCTGGCCTTCAAGGTCCATTCTGAACCTTCTCTGATACTTGACGAACTGT  
 GAGCGGACCACTGCTCTGCTTACAAACCCCAACCCCAACCCCACTCTCAAGCT  
 GAAATTTGACATTCAAAGGGATGGGTGGGGGGGGGGGGGCATACAATGTTCTCGTACT  
 GTACTGTAGGGCGCCACTGCCTTTGTGATGGTGATGCATACAGACACACTGATGGACG  
 TGTGTGTTTCTGTGTTGTGTGATGATCCTGTGTGTGGGGACAACATTAGCAGCACT  
 TTCTGTATCGTGTAAGCTGGTATTTCTGCATTATAGTGCAATATGTGACTTTTGATTTA  
 TAGCGAGGAGGAGAACTTGTGTATACCTTCGACGGGAGATTTAAATGCTGTTTGATAAG  
 CGGGAAAAAAAACCTGGACACTGAAATGCTGACGAGTTAAAAAGCAGACGACAAGGA  
 GACGTAAGCTGCTAAACAACCTGAATGTTTTAATCTGAGGGAATTAGGACGTATCAT  
 GAGTCTTATCTGCCATGCGAGTTGTCTGCCATTGCGTGTCTATTATTGTAATGATTGG  
 GCATTGGGATGATTTAAAGTCCACGATTGCTTGTGATTGTGCTGCTGCGTCACTGAA  
 AGAAAGGACGTATTTAAGACTGTAAGGTTTATTTCTGCTCCCACTTGCTTGAATAAACAG  
 TTCTGTTCTACAAAAGTGTACAGACTTTAGCTGAGTAGTTGAACTGAATAGGTCGGACTA  
 TTCCAGATAAAGTATGATTGTAACGTCACTGAAGTGATTGTAATTTAAAGGCTGTTCTTG  
 TTTCCAGAGCTTCTGCTGGTGGTCTGTTCTCTCTGTGAAAGGACAGCAGTATGTGT  
 AGATTTCTATATGAATATAAACCAACTATCAACATTACTGCATAGATGAATATATCTAT  
 ATAAATACATTTTATAAATGC

>emac\_fin\_isoseq\_HQ\_transcript/178\_per1b mRNA\_complete cds  
 GGTGTCCTCGCTGTAACCTACTGTAGGGGGTTCGAGCAATATTTTGAGAGCATATGCAG  
 ACAGCTGAGCAAAGGCAGTAGTTGCTACAAGGATTATGCTGTTCTTATTGACTTGCAA  
 ACACCTTACCGTGGAAATATCAAAGCTGTTGTGCTTTGAAACATATCTAAGGTGACCTTC  
 ATCTGAAGCATCACATCTCTGAAGAGGCAAGAAGACGAGATACAGAGTGTTCTCTGCTCT  
 CACCAAGAGCTGTTTTTCTCACTCTCCCTCACAATCTCTCATCCCATCTGTTGGAGCCT  
 TGTGCCAAGGCTGCTCCGTAACAGAAATTCATCTTGTGCGCATCACTTGAGTGACCT  
 TTCCAGATAATTGCACAGTTTTTGGAGCCTTCGCTTTGGTCATTTGCAAAATGTTTACA  
 ACCATTTGAATTTTCTCTGGTTTTTGACCCAGAAACAATGAATTTCTCTGTAAACGACAA  
 GCCAATAACCATGATTACCTGTCTATACATAGTAGACCCACTTAAATCAGAGTTATTGC  
 TGTTTTCACTTTGGCTGACACCTTTAAAAAGCTGCTCCAGCCTCATCTACTCTAGTAT  
 GAGTTATGACAACCTAATTATTGCCCAGCAGCAGCACTCGAGGGCGAGTGGCAAGGGC  
 CGACGAGAAAGAAAATGAACAGGAAGCAGAATCAGAGGAGTTAACTCTCTGAAACGAG  
 CAGTGTTCAAGCCAGCGCTAATGGCCCCGCTCAGGAGCAGGGGAGTGGAATGGAGGCGA  
 CTCCACTGGCGGCTCATCTCCAGTGTGGGTGCGGCTCCGAGGCTCGCCCCGAGACCG  
 CAGGGGGCCCAACTCAGATGATATGGACGGACTCTCCAGCGAAACGACTCCGGGGAGAG  
 GGAGAGCGAAGGCGGGATGGAAGAGACGGCGGTACGTGGGCGCCAGTCCGTACGCAG  
 CTCCCACAGCTCGTCAACCGAAAGGACTCTGGCATGATGCTGGAAACAGGAGAGCAA  
 CAAGAGCTCAACTCCCAGAGTCTCTCTCCCCCAGCAGCTCCCTGGCCTACAGCCTGCT  
 GTCCACAGCTCCGAGCATGACCCCCCTCCACCTCGGGCTGCAGCAGTAACCAAGTCCGG  
 GAGGGTGCAGACCCAGAAGGATCTGATGAAGGCCATCAAGGAGCTGAAGCTCCGCTCCC  
 AACCGAGCGCAAGGCCAAGGGCCACACAGCACCCTAAATGCACTCAAATACGCTCTTCA  
 GTGTGTCAAACAAGTCCGAGCCAACAAGGAGTACTATCACCAGTGGAGCGTAGAGGAGTG  
 CAGGGCTCGAGTCTGGACCTGTCTGCCCTTCACTATCGACGAGCTTGACAACATCACGT  
 AGAATACACACTCAAAAACACAGACACTTTACCATGGGCGTGTCTTCTGTGCGGGAA  
 GGTCGTGTACGTATCACCTCAGGCCTCATCCTGTTGCGCACCAAGCCAGAGCGTCTCCA  
 GGGGACTATGTTCTGTAGCTTTTGGCCCCGAGGATGTGAGCACTTCTACAGCGGTAC  
 AGCACCTGCCGCTGCCAACTGGGCTCTGTCATCGGGTCACTTCTGCTCCAGTGGA  
 CTGCACTCAGGAGAAAGTCCATGTTCTGCCGATAAGTGCCGACCGGGCGCAGGGCTGCGA  
 GATGCGCTACTACCGTTCCGCTCACGCCCTACCAGCTCACCATCAGAGACTCGGACGA  
 CGCTGAGCCACAGCCCTGCTGCCTGCTCATCGCTGAGAGGGTCACTCCGGATACGAGGC  
 TCCCCGTATCCCTCCAGACAAGAGGATCTTCACTACAAGTCAACCCCGAGCTGCATCTT  
 CCAGGAAATGACGAGAGGGCAGTGCCACTGTTGGGATACCTGCCTCAGGACTTAGTCGG  
 AACCCCGTCTGCTTACATTCACCCGGAAGATAGGCACATAATGGTGGCTATACATGA  
 GAAGATCTTTCAGTTTGCAGGGCAGCGTTTGAATTCGCCCCGAGGATGTGTACCCG  
 AAACGGGGAATATTTGACCATCGACACCAAGTGGTCTGCTTTGTCAACCCCTGGAGCGG  
 GAAGGTGGCTTTCATCGTAGGACGCCACAAAGTCCGAACGAGCCCTCTGAATGAAGACAT  
 GTTTCAGGGCCACAGGGCTGCGAGACTTGGACCAACAGGCCGACGTGGTGACGTGAG  
 CGAGCAGATCCACCGACTCTGGTGCAGCCGGTGCACAGCGGCACTCTCAGGGCTACAG  
 CTCGCTGGGCTCCAGCGCTCCCGAGGGTCCCGGGCGTCTCACCAGCAGCACCTCAGCGC  
 CGCCTCGTCCAGCGACAGCAACGGCCCCGCCACGGACAAGCGGTGCTCTGCGCAAAAC  
 TATGACTTTCCAGCAGATCTGTAAGACGTCCACATGGTCAAGACTAACGGACAGCAGGT  
 TTTCTGAGTCTGTAACAGGCCAACGCCAGGAAAACCTGCAGCATAGGCAACAACAG  
 CGTCAGAGCAATCAGCAGCGACCAATCAGAGGCTTGATAGCCGACATGACGATACCACC  
 CAAAGCTTTGCTCCTGCTCACTCGTGCCAAAGGAGCCTCCTACCGGCTACTCTACCA  
 GCAGATCAACTGTCTGGACAGCATATAAGGTACTTGGACAGCTGTAACATTCTCACAC  
 GGTCAAAAGGAAGTGTGGCTTCTCTTACACGTCTGACGAGGACAAGCAGCAAGATGG  
 CGGCAACAACAGGTGGTTCAGTTAACCTTGAAGTGAACACCTCTCTGCTCCCT  
 GACCATGGCCACAAAGGAGAGAGTGTAGCCTCAGTCACGTGCGAGTGTAGCTTACGAG  
 CACCATCGTGATGTGGGAGACAAGAAGCCTCTGAGTCAGACATCATATGGAGGAGGC

TCCCACTACTCCCAATCTGCTCTTCTACGTCCGCACCGACTGCTCTGTCGAGCGGTCT  
 GACGCTCCCGCTAACACAGCCGTGCGCTTTCTCTCTCCCTCCACCTCAAGCTCTCA  
 GCTAGAGAGGGACAGCCGAGGAGCAGCAGTGTAGGAGGGGGCGTATGGGCTCACAAA  
 GGAGGTGCTATCTGCCCCACCCAGCAGGAGGAGCAGGCGTTCTTTGACCGCTTCAAGGA  
 CCTCAGCAAGCTGCGCTCTTCGATCAGACGGCGGCATCAACTCTGCACTGTGAGAACCC  
 GGCTGCCAATCTCTGTGCGAGGAGTGCCTGTTCCCGGATTACCCCGCGCGGGCAG  
 CAGCACCAGCCACCGCGAGGTCGAGGCGGGAAGAGACTGAAACACCAGGAGTCGGCCGA  
 GCAGCACAGCTCTGCACTGAGCGGGAGCGGCATGACCCCCGAACAGCACAGCCCC  
 CATGCTGTCAACATGCCATCGGACCCCGACAACTCTCTCTGGCCTTCTGTAGG  
 CTCCAGGGCAGCATTCCCGCGCACCATTGCTCCGGGAATGCTTCCCATCTACCCCGT  
 TTACCCACCGATGGCACAGCCATACCCGTCCAGATCCATCCCGTTTCCCCCTGCCCA  
 GATGGTTCTCCCATGATGGCCCTGTTCTGCCCACTACATGTTCCCCAGATGGCAGC  
 CCCCATCGCTCAGCCGCCCCCACCACCGGACACTTCTACAACCTAACTTCACATACCC  
 CACCCAGTCGTCCAGTTATCTCCAACCCAGTGCCGATCCAGCCACCTGTGCCCGT  
 CCGCAGCAGCACCCTCAGTCTACAGCCAGCCCCCGCGACCGAGAGGGCGCAGAGTC  
 CCCCCTCTTCCAGTCCAGATGTTCTCACCCTCAACCTGTTGACGCTGGAGGAAACACC  
 GAGCAACCGGCTGGAGTGCACCGGCTGGCAGCATCACAGCAAGCCCCGCTCTGT  
 TCAGGGGGAGCGGCTGGGGACAGAGCTCAGCCAATCAGAGGAGCTGTGATGAAATATC  
 CAAGGAGAATGAGAACGGCGAGGCTAATGAGTCAACAACGATGCCATGTCCACCTCAG  
 CGACCTGTGGATATGCTGTTGACAGGAAGATGCCGCTCGGGCACCAGCTCAGCCGCTC  
 TGGTTCAGGGTCTCAGGCACGAGGTCCTCCGGCTCAGGCTCTGGATCCGGCTCAACGG  
 TTGACGCTCTTTGGCACCAGTGGCATGAGCAGCAGCCAGGGCAGCCACACAGCAAGTA  
 CTTCCGGCAGCATCGCTCATCAGAGAACGATCATTCCCGCAACAGCCAGCAGGGGGCAG  
 CAGCAGCGCAGGCGAGATGGTGCAGAGGAGCAGTTTATCAAGTGTCTCTGACGACCC  
 CATCTGGCTGCTGATGGCCAACCCGACGACAAGGTCATGATGACCTACGAGCTGCCTGT  
 CAGAGACATGGAGACTGTGCTACGAGAAGACCGGAGGCGTTGAGGAACATGCAGAAACA  
 GCAGCCACGCTTCAGTGAGGACCAAGAGGGAGCTGAGCCAGGTTACCCCTGGATCCG  
 CACAGGACGCTGCCCGAGCCATCAACATCTCTGGCTGTACAGGCTGCAAGTCCCCCCC  
 CTTGAGCCTCCCACGGCTCCATTGATGTTGTGATACAGAGATGGAGATGTGACGCG  
 GCTAAAGACGAGAAAATATTGCTGGAAAGGGCAATACAATTCATCAGAGACGCCAT  
 GGAGGAAGCTCACCAAGACGACGAAGAGGAAGCAACCAAAACGCAAGACAGCAACCAAGA  
 AATGACAACCGAGGCTCAGAAGCTGTGAAGGAAAGTCTCACATGACTCACTAAGGAGGA  
 GGCCAAAGACGAATAACGCTATGGAGACATTTCCGCTGATGTGCAGAACAGTGCACC  
 TTCCAGACTTTCTGTGCCCAAAAATAAATCACTGCACAGAGTTAAGTCGCTGAAGCGGG  
 AGGAAAAAAGGTGCATATTGATCGAGACAACCTCCGTTATTGCTGGACAGCACAAACA  
 ACTGTCATATTGAAATGCTTGGAGGACAGGACACGCACTTCTCTGTTCTTGGCATG  
 TTTATTGAAGCTGAAGGATAGACGGGAAGATGAATGTGCATCAGAACGACGCTTTATG  
 TAAAAACGGACATGCAATGTCTCGAAGTTTCGCTCAGGAGGAAAGAGGAGGTTTCA  
 GAGACTTTTCTGTTTTACAGGTCATGGAATCCTAATCCAATCTGTTCTCTCAAAGACT  
 TAATTTTGTCAATTTTGTATGTATAAAATGTGCCCTGATAGAAGAGAAACCCACGTTCTG  
 CTCATTGAAAGATATAGAGCGACAGCCAGTTTATTTGTAACTGTGTATATTTTATA  
 CTTTCTGCCACTGCGAATTGTGATAGGATAAATGTCTTAAAGAGTGTGACTGTCCCGTA  
 TCAGTTTCAGTCTTTACACAGACATGGTGTGTTCTGTTGCTTCACTTGAGGGATGTACA  
 GTGAATGTGTGGGACCGTGTGGCAATCGCCAGGAGACTGACCAAGGCTTTAAGGTCTCTC  
 CTGGGCGGGCATTAGTAGGAGCATTGGGAGGAATCCCCACAGTGAGAAACGGACAATA  
 TCTCTCTGAGAAGTGATGACAGTATTGCTGAAAACGGAGCTCTGAATCTGGAAGGGA  
 GGGTTCCTGTGTAGCAAGCGCTTGACACGCTTGCGAGAAGAGGTCGGCGACGTTTCTC  
 TCTGAGAGATTGGAATGTTAAGTATATTTCTCTCTGTCTGCTCCTATCGCTCTACCTGTG  
 ACATGTTCTGGTCAATGTGATATCTTTGCTTCACTGAGTGGTGTCCGCAACAGTTCT  
 AAATATTTTGTGAAATCTTTGTACAAAAAAGACAATAAAAAACGACTGGAAAATCCTTT

>emac\_TRINITY\_DN55851\_c0\_g1\_i4\_per2 mRNA\_partial cds

GAGATCATAGGGGATGTCCAAGGAACAGGAGAAACAGTAGAATCCAGCCAGAGCCCCGGCGCTCTCTGTGTTGTTTACCTCCCAGTCAAGAGAGGGAGTCCCT  
 ATAAGAAACTCGGGTTGACCAAGCAGGTTTGGCAGCCCATACGCAAGGAGGAGCAGACCTTTCTGTATCGCTTCAAGGAGCATCAAGGACTTACAGCGCTTAA  
 AGAAAACTGCTCTCAGTACCTGGAGCGTCAGAGGGAACAGATCGCCAGCTATGCTATACCCGCTGCTCAGTCTTCAAGCAGGATGGACCAATTGACAGAGCCACC  
 GCTCGGCGAGGTACACGGAACAAGAGGACCAAGTCAAAGCGGGCGAAGCAGATGGAGTCTCCGACAGCACAGTGTCCATCACAGACAGCAACACCTGCGGCCCTC  
 CTCTTCTAAACCACGGCCTTAACCTGACCTCTTGGTTCGAGCTCTGACACCTCGCAGTCAACGTTCCCCATGGCTTACCCCTCCGTGATGCCAGGCTACCCCTCCC  
 GGTGTACCCAGAGGAGTCTATAGCCCCCTGACACAGACGCCACTCTTCAAGGCTTGTGGACAATCAGGGTACCCAGCCCCCTCCTGCCCCCACCATCCAC  
 ACTTCTCCCTACACCGCCCCATGGTCACTCTATTGTGGCTCTCATGCTGCCCATGCCCTTCTCTCCATTGGCCCCCTCACTGCCACCTCCACAGCCCAATGTACC  
 ATGCAGCCACTGCTGGCTTCCCCACCAAAATGCAGCCTTTTGGTCAGGCTGCCTTCCAATCCAGGCCCTTTCGACGCTCTCCATCCTTCACTGTCCAGAACCA  
 GTTCAACTCACCAAAACCACTTGTCTACCGTCGAACTACATTCCTCCCTTCTGTTCTACTTCTCTCAGTCTCGGAAACCTCAAAGGCACCCATGTTGAGAGCCAG  
 TCTCGTCTTCCACGCCGAGTCTGGAGGAGGTGGAGGCCCGGCATCTCTCCCTGTTTCACTCTCGTGCAGCTCACCCTCAACCTGTGGAGCTGGAGCTGT  
 CGGTGGACCGGCAGGACAGCAGCGCTTCTCTTTGGAGGTCAAGGGAATAATATTGCAGAAAGGAGAGGAGGAGCAGTGGAACACAGGCCAAAGAGAGGGAGCT  
 GAAGCAGCCTTCACTCAGTCTCTTGGTCTCTGGACCTTGTATTGCGAGGGCTCGCCCTGTGTCTGTGATCGTTTGTCTGGGATAAAGTGTGCTCTAGAAGG  
 TCTTGCAGCAAGAGGCAAGTTCACGTGGCGATGGGAACAACAGTGTGCCAATCTTTGTCAGCGACATGTTGGACATTATCTCCACGAGGACTCAGCCGACT  
 CGGGGTCCATGGGCTCTGGATCGAATGTTGTAGTACTTCAGCCAGTGGGACCTCCAATAGCGGGACGCTAACAGTAGGACATCAGACAGTGGTACATCAAAGAG  
 CAGGACATCAGCCAGTGGGACCTCCGGCAGTGGGACAGGAAGCAACAACAGTGTAACTACTTTGGCAGCGTGGACTCGTCGAGAACAGTCAAGAGGTCAAAGGT  
 CACTGAGTGGCAGCGATGGCAGGCTTTGGAGATGGACACACAGTGAACACTTTATCACTGACATCCAGAGAGTGCTCAGAGACGACAGAGAGAAGCTGAGGATGC  
 TGCAGAAGAGCCAGCCGAGCTTTTCAAGGAGCAGAGAAGAGGAGCTGATGGAGGTGCACACCTGGATTAAAGAGAGGAGGTCTGCCAAAGGAGATAGACATCAAGGC  
 GTGCTCTGTTGAACAGCGCTCTGGAGGACGAGCGGTGGAGGAGGAACAGGCAACCTTGACATCGGTGAAACGGAGACACTGGAGGAGGGCTGTGACGCGAGG  
 CCCAGAGAGGAACCTCAACCTCAAACCTCTCTCAGATACTACCAGCTAGACAAACACTTCAAGATCTTCAAAGTGTATCAATTACCCGTGAGACTCTGTT





CCTGAGGGAGGAGCTGCAGCAGATGACCTGGCAGGCCCTTCTGCAAGAGGAGGTGGAGAG  
 CTACCAAGAGCAAGCCCCGGGAAGTCATGTGGCAGCTGTGTGCTATCAAAATAACGGAGGC  
 CATTAGATGTGGTGGAGTTCGCCAAGCGCATCGACGGCTTCATGGAGCTGTGTGAGAA  
 CGATCAGATAGTGTCTGTAAGCAGGCTCTTTGGAAGTTGTGTTTGTGCAATGTGCCG  
 TGCCCTTGACTCGCAAAACAACACCGTCTATTTTGATGGAAGTATGCCGGACCTGATGT  
 GTTCAAGTCATTAGGCTGTGACGACTTGATCAGCTCCGTCTTCGAGTTTGGGAAAACTT  
 GTGTTCTATGCACCTGTCTGAGGATGAGATCGCCCTGTTCTCCGCTTCGTGTTGATGTC  
 TGCTGACCGGTCTTGGCTCCAGGAGAAAGTGAAGGTGGAGAACTCCAGCAGAAAAATCCA  
 ACTGGCCCTCCAGCACGTCTGCAGAGAACCACAGAGAGGATGGTATTCTTACAAAGTT  
 GATATGCAAGTGTGACACTGCGAGCGCTGTGCAGTAGGCATACAGAGAAGCTTACCGC  
 TTTCAAAGCAATATACCCAGACATTGTGCGTGCCCACTTCCCTCCCTTATACAAGGAGCT  
 GTTCGGATCAGACTTTGAGCAGTCCATGCCCGTTGACGGGTAGCAGCCCTGCCAGGTGCC  
 AGTGTGCCACCGTAGGGGAATGTGGAGGAGGAATCTGAGACACTTTATTGGTGCCCTGC  
 ACACACCAGAGCGGACAGATGGCAGCTGTTCAACTTCTCTTTTACATCGGAGGGGAGG  
 GCTTAGGGAGTTGATTCTCAAGGTTTACTTTATTGAATTTAGTTCTCTTTGGAAGACTTG  
 TGGGACCCAAACAACCCATGGGACCTGAAGAGGAAATAGGGACAAATAATTTCTGTCTGGT  
 TGAACCTGACCCCTTTTGGCGCATTTCTGACATAATTACTTTATTCAATCATTTTACC  
 AGTATTTATTGCAATTTGCTTTTATTATGATTTACTATATGACTCAGTAATAGTACAACTA  
 TTACTGAGTCACCTTGGAAAGTAAAAAGCTGAAGAAGTCTTCAATTAGAAGATAAATCTGC  
 AAAAACTCAGTATTATTTTCAAATTGCATTCCCAAACGTTTAAAGTGTTCCTCTCAA  
 ACTTTGAATAGTCTTATCCCTTACCTCCCAACAACTGAACAAAGTTAAATGCGCACAT  
 TTTGGTCAAGTTGAGCCCTTTTCTCTGTGTTGAGTGAATATATTTGGACGACGATAC  
 TGGGAATGAAAACCTCAGACGACTTTGAGGGAGGGTCTGTCGGCATGGTGATGCAATCGG  
 CACCTCTATGGACAATCGTT

>emac\_TRINITY\_DN57227\_c3\_g1\_i1\_rorb mRNA\_partial cds  
 CCTGACGCCGGTGCCCAACCTGTTTCACTATGGAGGCTACCAGGACAGCCAGCTGGGACC  
 CAACAATGTCAGCATGGGAGAGCTGGACCGTATTGCTCAGAATATCATCAAGTCTCACCT  
 GGAGAGCTGTGTCAGTACACAACGGAGGAGCTGCAGCAGCTAGCCTGGCAGACGCACTCCTA  
 CGAAGAAGTCAAAATGTACCAGAGCAAGCCCCGGGACGTGTGTGGCAGCAGTGTGCCAT  
 CCAGATCACCCATGCCATACAGTACGTGGTGGAGTTTGCAAAGCGCATCTCAGGGTTTAT  
 GGAGCTGTGGCCAGAACGACAGATCCCTCTGCTCAAGTCTGGTTGTTGGAGGTAGTTTT  
 GGTGCGGATGTGACGGGCATTCAACCTCTCAACAACACTGTGCTCTTTGAAGGGAAGTA  
 CGGCGGCATGCAGATGTTCAAAGCTCTAGGTTGCGATGACTTGTGAGTGCCGTGTTTGA  
 CTTTGCCAAGAGTTTGTGTTCACTGCAGCTGACAGAGGAGGAGATCGCTCTGTCTCGGC  
 AGCTGTACTCATTTCCACAGATCGGCCTTGGTTAATGGAGCCTCGGAAAGTCCAGAAGCT  
 CCAGGAGAAGATCTACTTTGCTCTGCAGCACATTATGCAGAAGAACCACATGGACGAAGA  
 TGCATTGGCAAAGCTGATCAGCCGAATCCAAACGTTGTGAGCCCTGTGACGCTCCACAC  
 CGAGGAGCTCCAGGCCCTTCCAGCAGCTCCACCCAGAAACAGTCAACGTCCTCTCCCTCC  
 GCTCTACAAAGAACTGTTCAACCTGACCCCAACTCTGGGGTATGGCCATACCCAAGTG  
 ACTGCCGTGGTCCCAACGCAACAAACGGCATCAGCGGAGGACCAAGAAAATGAAAAGAC  
 AGCCACGTCTGACGAGACGACAGCAGCCATGTGACTATGTCTCATCGTGGCAATCACA  
 TATTCTGAGCTCCCCGAGCTTCATTATGAGCAAGGGGTGAGGAGCCATCTGCCAGGAA  
 CTCACAGTTACGCCAACAATACTAGGAATGTCCAGCACTTATTCATTCTGTTCACCGA  
 TACAGTCTGAAGAATGTATATATAAATGAAACGCGCCCGAGCCACAATTTAAGTGGGGT  
 TGCTCCCGTCTCTGAACTGAACTGAACTGACTGACCAGAAATGTACAGACTTTAAAAACA  
 TCTAGGAACAATGTTAAGCTGTCAATCTTTTTAAAAAATAGGTAAGTTAATTTGTTTTA  
 CCTTTGAACAAAATCCTATTGGTTTGTCTTTTATTTTCGAGTGAAGAAATTTGTGACGCT  
 GGACGGGGGAGGGAACCTGTGGATTTAGAGAAGCTATTGTAGATATTCTTCTAGTGCAGAG  
 CGGATTCCAGTATTACTTCTTGTCTGTTAAATAAGTTAGTCTAATTTAACTATACAG  
 CAGCCCACTGTGGCTGACTATACCTTGTCTATGTGTTTTATTTTATTTGATAGTTTCTT  
 GTGTACAGAATTTGTAAGTTGAGACATGTAAAAGAATATTGAGTAAAACGGGAGACGA  
 TTCGGGTTTTGTTGATATATAGAAGCCTTGTCTGGATTTTGTTCATATGTAAAGAAGGTA  
 CTGCATCTCTTGTATGAGAAGTTATAGAAATGTAAAGAGACATATGAAGGATTTAAAAA  
 GAAAAATAATGCCTATTACTTTTCAAGGTGAAGATATATACATAAATATTCTATTTTGCAA  
 GAAAAATAATCTGGCAGTTCTGCCATCTATCAATCATTTTCTTCTCGTGCAATAATA  
 AAGTCCAATAAAGATGGAGTGTCTTCGAACAATCAACAGAAAAAACAATCAGAAACT  
 AGGACCTCACAAATCAACCCACCCCTTCCCAAATCCCTTACCCTGCCCTTATTTCTT  
 ATGTATTGCATCCTTGACATGAGATTTTACGCCGACAGAATAGTCTAGAAATCACAATGAA  
 GAAGTGGATAAAAGTTCCACCAAAAACACTAAAGACAAGCTTGAATCAACTTTCCAATG  
 TGAAAAAACAACCTGTATGAGTGTGTATGCCCTCCCATCACTATTGTCACAAATCAG  
 TCCGTGGATGTCAATCACTCCGGGTGAGAATGAAGGACCCTTTTTCTCTAAAGAGC  
 AATAATAACTTTCACTGCTTTCCGATCTTTCTTTTCTTCTCTCTATGTCAGCT  
 GTTCAAAACAGGATAGCAGTTTAAATAGATTGCACTATATTGATCATTTATTATGTCT  
 AACAATCATCTCTATTGATGTTACTCATTTACCGCAGCATCTGAGTGTGTTTTAACGTG  
 ACGTAACAGGATCTGGGGTATGACACAAACGACAGACCTGAAAAAAGAACTTGTGAAG  
 TTATGAAGATTAGCCTCCGATGATCTTAACTTTAAATGCTGCAATATTACATTGACC  
 AGTTACACAGAGGATGTGAAAGACAATCACTTGTCTGCTTTTCTATTAGTCATTTTCA  
 AATTATTAGCACTTACAGGTTTTCTATACTAATGTTAGGTTGAATGTGATTGGCCACT  
 GTGTAAATCTGGGTATAAATCACTGTCTTTTGTGATTTCTCTATACGCTTACTTTTGTA  
 TACAGATCTTTGATGCGCTACGGAAAAATCCCTTATTACAATCTCCACTTAAAAATAGCTA

TTCACCAAAATAAGTGACCCGTTAAAAATAAGTGCACAGCATTAAATCAGCTGATTGTGC  
 TTTTACAGACTGTTATCAATTTACTTGTGTTGACATAATGATAATTTTGCAAGAGGATTT  
 TCTAATTTCTAAGACAGCACTTAGATTTTTAACTTAACCTCAATAAATGATTAGTGGAC  
 AATGATCTATTGTTGTCCGTGCACTAAAAGTGGAGATATGATTTGTCTGAGTTGCAAT  
 AAACAGTGGCCAAATCTCAATGTGCTCTAAGCATGGACACAATCAGACTAATTATCCTT  
 TCATTAACATTACCGTGTGCATCCTTTAATCTCCACATAGTCAACATAACGATGTGGACA  
 TCCTTCTCCGACCCCTGACCCGACCCAGATCAGAGGCCAGTGACTCTTAAGACAATCA  
 CTTGCTCATTAAGGCTCGATGCACTACAGCATCTCTCAGGGAGCAGCTTTTTTCTGACT  
 TTGCATTAAAAAGGGTTTAATATTTTTGCAATTTACAAAAAAAATGTAATTATAAAA  
 TA

>emac\_fin\_isoseq\_HQ\_transcript/31310\_rorc mRNA\_complete cds  
 AACTCTCTCAGCTGGACGGTAAGGGCGCACGGAGGGCGCGGGGAGGGGAGGGCGGG  
 GCGCGCGACTTGTGAACGGCGGGCGGTCAGCTGCACTCTCCCCCTCTGCTGCTG  
 CCTCGGGGGGAATTAATTTTCAAAACGACCTCACAAAAGGAGGTGACTTCGGAACA  
 AACGGGAGGCTGACAGAGAGAGGTAACACATGACGACCGAGCTGTGGCTCCCGCTGTAA  
 GGACAAGAGGGAGGCGAGATGGCAGTGCATGTTTTCAATGCCTGCGCCGGCCGGGCGC  
 TAGAGCAACCAACAGAGAGGTGAGTGTGTAGGACCACCCAGTGTGTTGACAGGAGAGTTA  
 TGGAATATGAGGAGCTCGACGTGCCCCCACTGACAACCTATCAAAAGAGAAGGAGCCA  
 TGTCCAAGAAGACTCATTTGACCCAGATTGAAGTTATTCATGTAAGATCTGTGGGGATA  
 AGTCCTCTGGAGTCCATTATGGAGTCATCACTTGTGAGGGCTGCAAGGGATTTTTCCGGC  
 GTAGCCAGCTGCCTACTGTTTCTACTCTGCTCCAGGCAGAACACTGTGATCGACC  
 GGGCCAGCCGCAACCGCTGCCAACACTGCCGCTGCAGAAAGTCTTAGCACAGGGCATGA  
 GCAGAGATGCTGTCAAGTTCGGACGGATGTCCAAACGTGAGCGGACTCCCTGATTGCTG  
 AAGTGGAGAGGACCCGACAGCAGCAGCAGCAGCTTACGGAAGACACCCCGCTCTCTCT  
 TGTCTTCCCCACCAAGGCCGCTCAAGACCGCTCAGCGCAACTCCTTCAACCCATGGCCT  
 CCACCTACTCCTTCCACCGGGAGTCCGAGCTGCTGTCTTACACGGCTGATGTCCACCTT  
 ACCTGATGTGCTCCCCGAATGAGTCCAGGTGTGGGTATGATCTACCGAGGCTCCGCTG  
 TGTCTCCACGTCGAGATCCAGGGGAGGGGCGACAACAGCGGACTCCCTGAAAGCGGAT  
 TTGACTCCAGACAGCCAACATCATGATCTGGTGGCGATTACCCCTACAGCCCTCTGGAGG  
 ATCCTTACAGCTCTATCTCACTCTTTGAGAAACATCGATGAGCTGTGTCCAGCATTG  
 TGCGCTCCACAGAGAGAGCACTCAGTACAGGGCAGAGGAGCTGCAGGCTCTCAGATGGA  
 AAGTGTCTCAGCAGAGAGGAGATCCAAGCTACCAGAGCAAACTAGTGGATGACATGTGGC  
 AGCACTGTGCCATCCGACTGACTGATGTGTCCAGTATGTGGTGGAGTTTGCGAAACACA  
 TCCCAGGTTTTCTGATGCTCAGCCAGAACGACAGATAGCTCTCTTGAAGACCGCTCTA  
 TGGAGGTGGTTCTAGTCCGGATGTGTGCTACTTCAACACAGAGAACAACACCGTCTTTT  
 TCGATGGGAAATTTGCTGGAGTTGAAGTCTTCAAGTCTCTGGCATGTGGTGATTTAATCA  
 CAGCAGTGTGTTGACTTTGCTCACAATATGTGTGCTCTCAAGCTCACTGAGCAGCAGATCG  
 CTCTCTTCAAGTGTCTGGTGTGATCAACACAGAGCGTCCATGTCTGGAGACAGAACCA  
 GAGTTCAACGAGTGCAGAAAGCGTGGAGTTTGGACTCTCACACATTCTCCACCGAGACA  
 ATCAAGAAAGTCTATTGACACAAGCTGTACCAGAGGATGGCAGTGTGCGTTCACTGTGCA  
 GTCTGCACATGGAGAAGCTGCGCTGGTTCACTCAGCGTTACCCACTCACCCTCACTCTC  
 GTTTCCTCTCTTTTACAAGGAGCTGTTTGCTGCGAGGCTGAGCAGCTGCCGGGAACCA  
 CTCCTGATGATTCACTAGATCATGCAAGACACAACTTATTTCAAGTCTTCTTTACTT  
 CCTTGACAGAATCTATTTTTCTAATAATTAAATAAATGAGAAAAAGCACTGTAATCTTA  
 ACTTGTGTTACTACTGTATTTTATGAATCCAGCAGAGCTTTTGTAGCTTGCATCAGAG  
 ATAAATATCAATATTTTACAGTTTAAAGTGTGTTGATTATTACAGGGAACGTGTGCT  
 TTTGTTGTTGTTGACAGTACATTGTAGAGGGTCCAGAATTAATTTCTGAGTTACAG  
 TGCATTCCGACACAGACATTTAAAAAGCAGAACACCTTTCATTGTTTAAATGCTAGTT  
 CAGAAGAAGGAAAGTATGACTGTTTATGTATGTGTTAAATAAGCCCGAACAGAGACACA  
 GGCACATAAGGAAGATGATGAAGTTATGTTTTTTTCAATTTTATCTGATGTTTCAAGT  
 TGACAATCAGTTGCTAATTGGCTTGTGGTGTCTCTCTCTCAGTATTTTCAAGGACCTG  
 TAAAAAATCCTACCTTACATACCATACACATTTGAAGGTTAATGTAGTGCCTAACA  
 AGTAGCCCTGCAAAATAAATAATTTGGTGTGTGACAATTACATACAGAGTGTAAACAC  
 ACCCAGAAAACCGAGACAACCTGACCTTGTGTTTGTAGAGAAATGCATCTCCTCTTCAAG  
 TAACAGATCGACCATAAGTCTCAAAAGCAGCCGTACCTCTTAAATGTTATCCTTTGTGT  
 TTGAACAGATCCTAACAGGCTTTTGGTGTGTTTAAAGCTAGAAAAGATGTTGCATTAAC  
 GTATAAATCAATTAATGTGAGCAATAAAGTAGT

>emac\_emac\_TRINITY\_DN61725\_c0\_g14\_i1\_rorca mRNA mRNA\_complete cds  
 CTGCCACACTTTCCACGACGCTGGAACCTCCTTCAAGGGCGCGCGAGGGTGGCGCGC  
 CCGTCAGATCACGGGGCAGGAGGCGGGCGGACCCGCGGGTGAGGATCATGTGTAGTCCAC  
 GCGCGAAACTGAGTTAGCTTACGCGAGCTGCAGAGCAAGAAGGAGCTGAGAGAAGTGG  
 AGCTGTGCTTTATCACCGTTTTATCACAGTAATATCGTTAGACCCGACGGAAGTGACT  
 GACAGAGATTAAGTAAACACACACCGTGTGCTTTATTTGTTTAAAGTGGTGCATG  
 CAAAGAAGGCTGGAAATCCATATGAGGATTGTGTTGTGACAGTTTTTCAAGTGTCTC  
 GTTTTGGAGCAAATAAGTGCAGCTGCTGTGTTCTGGGCTTCATTTCCACCTGGAGTTGT  
 ATGACTTGAAGAGTTTGGCTAGACTTACCGCCACCATGAGAGCTCAAATAGAGGTAATA  
 CCGTGTAAATATGTGGGGACAAATCATCTGGGATTCATATGGTGTCTTACCTGTGAA  
 GGCTGCAAGGGTTTTTCCGCCGACGAGCAGACAATGCTATGTACTCTGTCTGCGCA  
 CAGAGGAACGTGTTAATTGACAGGACCAACCGTAACCGTTGTGAGCACTGCAGGCTGCAG



GAAACAAAAAAGGAGTGACAGAGAAGGATAAAGAAAGCTCAGCAACCAGCAGTTTAGA  
 GACAATCCAGGACTAAATACTCCGTCCTCCATGATCCCAAGTAGTCTCCACTTTCCCA  
 GCAGGCAAAGCACCTTACATACAGACCACATGCTTATGGTCTCTTATATTGTAGCA  
 TTAATAACAATCGGATGGGCATCGTAATAATAAAAGCCATTAGCATGACACAGCTCCA  
 CGTTCTCAGACACTTATTTAACATCAGATCCACTGTGGATCACCCACCAGTTATGAATG  
 TACCTCATCAATAAGCACCAGTGCACAGAGTAAGAACCACCAACAGTGAATGTACAACC  
 CTGCCACTTTAATGCAGAGTTTACACATGGTATTAGTCGTGTTGATCCATAGGTCTCAC  
 TATCATTACATCTCAGAGTCAATATGTTGTGCCTGCGTATTCTTACAGACAATATCCTTG  
 TACTGACCATCACTTAGGGACCAAGATCATGAGTCTTTTTGTCTGATAT

>emac\_fin\_isoseq\_HQ\_transcript/74008\_rorcb mRNA\_complete cds  
 GAGATCATGGGAGAGTCCACCGCGCTTGAGAAAAGTGGGTTAGCAGGGTAGACTGAGAGG  
 AAAGCAGGCGGAGAATCAGAGCGCAGAGGGGGGGTCCGATCAATGGTCCACTGTGAC  
 CGTGCGACTATTCTGTGAGAAAAGTTTTGCTTCACGTTTAAACGATGCACTGAGAGATT  
 GCGATGCAATCCGTTGCGACTTTTTTCACTCTTTTATTCGCTCGGACTTGACCGAGCGA  
 TAGGGGAGAGGAGTTTCGGGTAGTTATTTTCCATAAAATTTTGGTCTGTGCTTTCGCAAG  
 GCTGTCTGCAGCCAGGACGAAGTTAATATTTACGAAGCCAGTTCACTCTGGCTCCAGCGG  
 CTTAATCTGCTCGACCGTGTCAACTACATTAACCATATGAGCCGAGTTTACCATCGTT  
 CTGCCAAGAGAAAAGAAACATCAACATGAGAGCTCAGATCGAGGTCATCCCTGTAAGAT  
 TTGTGGGGACAAGTCTCAGGAATCCACTATGGCGTCATCACCTGTGAAGGCTGCAAGGG  
 TTTTTCCGTGCGAGCCAGCAGAAACATGCCATGTACTCTTGTCCCGCCAGAGGAACGTG  
 CCTGATCGATCGAAACACCGTAACCGTCCAGCACTGTGCTTACAGAAGTGTCTGGC  
 CTTAGGCATGAGCAGATGCTGTCAAGTTTGGTCTGATGTCCAAGAGCAGCGCGACAG  
 TCTCTACGTGAAGTGCAGAAACACCAGAAGTCCAGGAGTGTGAGGCTCTGAGGCGG  
 TGGCACTACAGCTCTGTCCCAACACAAAGAGGAAGGTGTCAAAGAGACTCTGAGCCGGTC  
 CTACAGCAGCGGGGCTCCAGCTCCACCCTCAGCGACCTGGATGACATCGAAACGCTGCC  
 GGACCTGTTTGGACTGCCACTTGACCCCGAGGAGGCCAACGACTACTGTAGCATGGAAT  
 GCTCGGCGGCGGAGCCAGCGCGGGGAACACCTCCGCTCATCTCTTCTTCTTCTCTC  
 CTCCCCATCTTGTCCAATCAGAATTCCCGCAGCAGACTATGCTGGACGGGGCAGACAG  
 CAACGGAGTCCAGCTTCTGCATTCTCACACACATGCACTGCTGGACCATCTGCCTAATGA  
 CTGCTCAACAACAGAATTGAGCGCATCACTCAGAGTATTGTTAAGTCTCATTTAGAGAC  
 GTGTACGACAGCGCTGAAGACATGAAGAGATTCACTGGGTGCAATACGCGCCTGAGGA  
 AACACGTGCTTTCCAAAACAAGTCAAGCAGAGTGGATGTGGCAGCAGTGTGCCACCACAT  
 CACCAATGCCATTCAAGTATGATGAGGAGTTTGCCAAACGATTGCTGGCTTCATGGACTT  
 GTGCCAGAATGATCAGATTATTAATGAAAGCAGGCTGTCTGAAGTCTGTGATACG  
 TATGTGCCGAGCTTTCAACGTAAACAACAGCTCCATTTTCTTCAATGGAAAGTTTGCCCG  
 GGCTCAGTCTCTCAAAGCACTTGTTGTGAGGACCTGGTCAGTGCAGTGTTGACCTGGG  
 TAAAGGACTCTGTGCTACAGCTGTCTGACGAAGAGATGGCTTTGTTAGTGTGCGGT  
 TCTGCTTTCTCTGATCGACCTGGCTAACAGAAGGCCAAAGGTTGAGAAATCCAGGA  
 GAAGGTCTACCTGGCTCTGCAGCAGCTCTAAACAAGAGTGGGGCTTTTGAGGAGAACT  
 GGACAAAGATGGTTTCGAAGCTGCCCATAAATGAAGTCAATCTGTAACCTCCATGCGGATA  
 ACTGGAATTTTCCGCTTGGTCCACCCGGAGACTGCTTTCAGTTTCCACCCTGTACCG  
 GGAAGTGTGTTGGCAGCGATATGACTCTGCCTGACTCCACCAACAGCTAGACAGACACAAA  
 TAGGAGAGATGGAGAGAGTGTATTAAGAAGTAGGG

>emac\_fin\_Isoseq\_HQ\_transcript/3075\_timeless mRNA\_partial cds  
 GGTCTTGGCGGAGACTTGTCCGACAGAAGAGGGCTGAAACCACTAAACAACAATAATAA  
 CTTCTGAAAAGATTTACATTTATACACCGGAGATGAACACGGAACCTGTGGAATAACA  
 GCGTTTAAACGATCTGGCTGTCTGATGTTGTTGGACTAAGTCAGGATGAATTGCGATCT  
 TTTGGCAACGTGCACTGCTCTCGGCTATCTGGAGGAGACACCTATCACAAGGAAGCTGA  
 TTGCTTAGAGAGTGTGAAAGACTTGATCAGGTATTTACGCCATGAAGATGACACGCGTGA  
 CGTCCGCCAGCACTCGGTGCTGGCCAGATTGTACAGAATGACCTTTACCTATGATCGT  
 CCAGCATGGAGAAGACAAGGCCATTATTTGATGCCTGCATCAGGCTCATGGTCAACCTTAC  
 TCAGCCTGCCATGCTTTTGCTTCGGTAAGGTCCCCGATGACCCAGTGTTCAGACATCACTT  
 TTTGCAAGTGACTGCTCATTACAAAGCCTGTAAAGAGGCATTGCCAGTGAAGCAGTGT  
 TGGCATTTTAAAGTGAACATTATACACGCTTCTACAACGGACTGGGAGCAGAGACAGGA  
 GGAGGATAACCTGCTGATAGAAAGGATCCTGCTGCTGGTCAGAAATGTGCTTCATGTTCC  
 TGCGGACCCCTGTGAGGAGAAGAAAGTAGATGATGATGCCAGCATCCACGATAGGCTGCT  
 GTGGGCCATTACATGAGCGGATTGATGACCTCATCAAGTTCTGCGCTCGGCCACAGAG  
 TGAGCAGCAGTGGAGTATGCACGTGTAGAAATAATCTCCCTCATGTTTCAAGATCAGAC  
 GCCTGAAGCTTTGGTGAGCGCGGTGAGGCTCGCTCAGCAGAGGAGAAGCAGAGAGACGG  
 TCTGGAGCTGGAGGCACTGAGGCAGAAAGAGCACGCTGCGAAACGCTCCCGCAATTTCA  
 GAGGGGAACAGACACTCTCGCTTTGGAGGCTCCTATGTTGTGCAAGGCCCAAGGCGAT  
 TGGGGACAATGACGTGATTTATCACAGAAATATTCATAATTTCAAAAACATACTCATGA  
 CACCGGCAAGCAGTGAGACGTGTTCTTAAAGGAATCGACAGGCTCGGGAATGTAAGGA  
 CAAACGCCGCTCAGCCCTAAACGTCGACTCTTCTGCGAGAGTTCTGTGTGGACTTCTT  
 GGAGAACTGCTACAATCGCCTCATGTACCTTGTCAAGGAAGGCTAAATCAGAGCAAAAC  
 TCAGCAACAGCATGAGACGTACTACCTCTGGGCGCTCAGCTTTTTCATGGCTTTCAACCG  
 CGGCAACGTTTCCGTGACAGCTTAGTTTCTGAGACCATGTCCATCCGTGCTTTCCATTA  
 CATTGAGCGAAACATCACTAACTACTACGAGATGCTTCTTACAGACCGCAAGGAAGCCAC  
 GTCCTGGTCACGCAAGATGCACCTGGCACTTAAGGCATATCAGGAGCTGTGCTAACTGT

GAACGAGATGGACCGTTCCAGGATGAAAGCATCCGTCAGAGTTCAGTGTTATTTAAAG  
CAACATATTTTACCTGATGGAGTACAGGGAGATCTTCCTGACCCTGCTGAGGAAATATGA  
TGAAACCAAGCAGCCTCACTCCTACCTCATAGACCTAGTGGAGTCAACTCATCTCTTCAT  
GCGCATGTTGGAGCGCTTCTGCAAGGGCGCAAGAACTTGATGGTTCAGAGAAAAGAAAGT  
GAGGCGGAGAAAGTCTAACAGTAAAAAAAGCCCCGGCACCAGATACTAGTCCGGAGGC  
TCTGGCAGAGACCTGGAAGATTGTGGAGGAAGAGCTGAAGGCTTCAGGCTTTAAGTTGTC  
AGAGACTTTAACTGAAAGCATCGTGCCATTTGATGCCACATCTGAAACTCCACTCGAGGA  
CCAGAAGACGGAGACCATGGTGCGGGTGCAGGATGCGATGCTGGGTCGCATGGGACCGGA  
GGCGCTGGGGATGCTGCGAGCTGCCAGGGAGGTGTGGCCAGAGGGAGATGTGTTTGGTTC  
AGCTGACGTTGAACCTGAGGAGGAACGGAACTCCTCAAGCAGATCCTGTTTGCGAATCT  
GCCAAGGTCAGCTCCTCCTGAGCCTGTGGCAGAGGAGTATGAGGATGATGCTGAAC TAGA  
AGAAGAAGAGATGGAGTCCATCCAGGTGCTGAAAAAGAGTTTGACTTTCTAGACTTTAT  
CAAGAGGTTTTCCAGCCAGTATTGTGCGTCCATACCTCCTTTATTTAAAAACATACTC  
CAAAAACACACCTCACACAAACCACTGCATCGCCGAATGCTGCACCGCTGGCTTTCGA  
CCTCAAAATGGACGCCAGCTTTTTTCAGCTGTCAGTCTTCAACATTTTCAACAAGATCCT  
GAGTGACCCCGCTGCAGCTGCTTACACGGAACCTCGTGACCTTTGCCAAGTTTGTGCTGAA  
CCGTTTCTTTTCCCTGGCAGCAAAAAACAATAAGGCATATGTTGAGCTACTGTTCTGGAA  
AAATGTGGGCGCTGTACGTGAGATGACCGAAGGATACAGCAAAGACGGAGAGGAAACAAA  
ACCATCATGGACTGAAGAGGAGGAAGAGGAGTTACGCATCCTCTTTGAGGAGCACCGTGA  
TTCTGAAGTGCCAGATGTAGTGGAGGCGCTGCTGCCATTACTCAGCAAAAGAAACCGCAC  
CCGGCGCCAGGTGGTGACGCAGCTGGTGACATGGGTCCTGGTGGCCAATGCTAAAGAACT  
GAAGAAACAGAAGAAAGGTACCCAGATTGTTCTGTGGACTGAGGAGCAGGAGGAGGAGCT  
GCAGATGCTCCATGAGGAGTACAAAGACTCTGATGATGTGCTGGGTAACATCCTGAAGAA  
GCTCACAGCCAACGGTCCCGTGCCCGTGTGGTGGACAAGCTGCTCAGTATGGGCTTAGT  
GTCTGACAGAAGAGAACTCTATAAGAAAGAGGAGTCGCGCGCTCCAGGGAAAAGCTCTGG  
AAAAAGCTCTGGAAAAAGAATGACTGAAGAAGATTTCTTGAAGAACTAACACAAGGGTT  
CCCAGATGATCCAGTGGACAGAGATGATGAAGATGAG
