# Supplementary material for: Chromosome-Level Genome Assembly and Circadian Gene Repertoire of the Patagonia Blennie Eleginops maclovinus—The Closest Ancestral Proxy of Antarctic Cryonotothenioids
Source: Genes (Basel). 2023 May 30;14(6):1196. doi: 10.3390/genes14061196 (PMC10298351; doi:10.3390/genes14061196)
Supplement: Supplementary file 1 [file genes-14-01196-s001.zip]

Archive with 5 entries (5 files):
- Fig.S2_cry3a_maps.pdf
- Fig.S3_Palb_arntl1.pdf
- File.S1_Emac_fin_IsoSeq_RNAseq_Circadian_Transcripts.pdf
- Tables_S1_S2_S3.xlsx
- Fig.S1_Emac_Xmac_WG_synteny.pdf
